# Supplementary material for: Enantioselective one-pot synthesis of dihydroquinolones via BINOL-derived Lewis acid catalysis
Source: Royal Society of Chemistry journal article supplement (doi:10.1039/c4ob00627e), 2014-01-01
Supplement: c4ob00627e1.pdf [file c4ob00627e1.pdf]

Supporting Information

**Enantioselective one-pot synthesis of dihydroquinolones  
via BINOL-derived Lewis acid catalysis**

**Peter C. Knipe and Martin D. Smith**

*Chemistry Research Laboratory, University of Oxford, 12 Mansfield Road, Oxford, OX1 3TA, UK*

*Tel: 44 (0) 1865 285103; Fax: 44 (0) 1865 285002; E-Mail: martin.smith@chem.ox.ac.uk*

# 1. GENERAL INFORMATION

Unless otherwise indicated, all reactions were carried out under a positive pressure of argon or nitrogen (balloon pressure) in washed and oven-dried glassware.

## 1.1 Solvents and Reagents

Tetrahydrofuran, dichloromethane, diethyl ether, methanol, toluene and acetonitrile were purified by pressurized filtration through activated silica columns, employing the method of Grubbs *et al.*<sup>1</sup> Unless otherwise indicated, solvents were used as supplied (analytical or HPLC grade) without further purification. “Petrol” or “petroleum ether” refers to the fraction of petroleum ether boiling in the range 40–60 °C. Where mixtures of solvents are specified, the stated ratios are volume:volume. Triethylamine was distilled over calcium hydride and stored over potassium hydroxide under an inert argon atmosphere. Unless otherwise indicated, all aqueous solutions used were saturated. Reagents were used directly as supplied by major chemical suppliers, or purified by procedures described by Perrin and Armarego.<sup>2</sup> (R)-TRIP (**6**), (+)-2,2'-Isopropylidenebis[(4R)-4-benzyl-2-oxazoline] (**5**) and 2,6-bis[(3*aS*,8*aR*)-3*a*,8*a*-dihydro-8*H*-indeno[1,2-*d*]oxazolin-2-yl]pyridine (**4**) were purchased from the Sigma Aldrich<sup>®</sup> chemical company.

## 1.2 Chromatography

Flash column chromatography was carried out using VWR silica gel (40–63 µm particle size). Analytical thin-layer chromatography was carried out on Merck Kieselgel 60 F<sub>254</sub> 0.25 mm precoated aluminium plates. Visualization was carried out under ultra-violet irradiation (254 nm) and by appropriate heating with potassium permanganate, ammonium molybdate or ninhydrin. Potassium permanganate solution was prepared by dissolving potassium permanganate (2.5 g), potassium carbonate (13 g) and sodium hydroxide (0.63 g) in water (250 mL). Ammonium

molybdate solution was prepared by dissolving ammonium molybdate (5 g) and ceric sulfate (0.2 g) in 5% aqueous sulfuric acid (100 mL). Ninhydrin solution was prepared by dissolving ninhydrin (0.3 g) in *n*-butanol (100 mL) and adding acetic acid (3 mL).

### 1.3 NMR Spectroscopy

NMR spectra were recorded on a Bruker AV400 ( $^1\text{H}$ : 400 MHz,  $^{13}\text{C}$ : 101 MHz,  $^{19}\text{F}$ : 377 MHz), Bruker AVII Cryo 500 ( $^1\text{H}$ : 500 MHz,  $^{13}\text{C}$ : 126 MHz), Bruker AVII 500 ( $^1\text{H}$ : 500 MHz,  $^{13}\text{C}$ : 126 MHz,  $^{19}\text{F}$ : 470 MHz), Bruker DRX500 ( $^1\text{H}$ : 500 MHz,  $^{13}\text{C}$ : 126 MHz,  $^{31}\text{P}$ : 202 MHz) or Bruker DPX300 ( $^1\text{H}$ : 300 MHz,  $^{13}\text{C}$ : 75 MHz) spectrometer. Chemical shifts are quoted in ppm, and are referenced to the residual non-deuterated solvent peak.  $^1\text{H}$  spectra are reported as follows:  $^1\text{H}$  NMR (*spectrometer frequency, solvent*):  $\delta$  *chemical shift/ppm (multiplicity, number of protons, J-coupling constant(s), assignment)*.  $^{13}\text{C}$  spectra are reported as follows:  $^{13}\text{C}$  NMR (*spectrometer frequency, solvent*):  $\delta$  *chemical shift/ppm (assignment)*. Multiplets are abbreviated as follows: br – *broad*; s – *singlet*; d – *doublet*; t – *triplet*; q – *quartet*; hept – *heptet*; m – *multiplet*, and are reported based on appearance rather than interpretation. Compound multiplets are reported in the order of decreasing coupling constant magnitude. Spectral assignment was aided by the results of DEPT, COSY, HMBC, HSQC and NOESY experiments where appropriate. Unless otherwise indicated, spectra were acquired at 298 K.

### 1.4 IR Spectroscopy

Infra-red spectra were recorded on a Bruker Tensor 27 FTIR spectrometer equipped with an attenuated total reflectance attachment with internal calibration. Absorption maxima ( $\nu_{\text{max}}$ ) are reported in wavenumbers ( $\text{cm}^{-1}$ ).

## 1.5 Mass Spectrometry

Mass spectra were recorded on a Micromass LCT Premier spectrometer under conditions of electrospray ionization (ESI). Accurate masses (HRMS) were recorded on Bruker MicroTOF and Micromass GCT spectrometers under conditions of ESI and field ionization (FI) respectively. Masses are reported in daltons (Da).

## 1.6 Melting Points

All melting points were measured on a Reichert melting point stage, and are uncorrected. Solvents are reported in parentheses where solids were purified by recrystallization. Temperatures are reported in °C.

## 1.7 HPLC

Analytical chiral HPLC was performed on a Dionex Ultimate 3000 HPLC system comprising a Dionex LPG-3400A pump, WPS-3000SL autosampler, TCC-3000SD column compartment and DAD-3000 diode-array detector, equipped with the appropriate Daicel Chiralpak column (dimensions: 0.46 cm  $\phi$  x 25 cm) and corresponding guard column (0.4 cm  $\phi$  x 1 cm). Wavelengths ( $\lambda$ ) are reported in nm, retention times ( $t_R$ ) are reported in minutes and solvent flow rates are reported in mL/min.

## 1.8 Naming, Numbering and Depiction of Compounds

Where given, systematic compound names are those generated by ChemBioDraw Ultra 12.0 following IUPAC conventions. The numbering of atoms for discussion and spectral assignment purposes is arbitrary and not necessarily consistent with the IUPAC names.



## 1.9 X-ray Crystallography

Crystals were mounted using the oil technique, in perfluoropolyether oil at 150(2) K with a Cryostream N<sub>2</sub> open-flow cooling device. Single crystal X-ray diffraction data were collected using graphite monochromated Mo-K $\alpha$  radiation ( $\lambda = 0.71073$  Å) using a Nonius KappaCCD diffractometer. Series of  $\mu$ -scans were performed to provide sufficient data to a maximum resolution of 0.77 Å. Data collection and cell refinement were carried out using DENZO-SMN. Intensity data were processed and corrected for absorption effects by the multi-scan method, based on multiple scans of identical and Laue equivalent reflections using SCALEPACK (within DENZO-SMN). Structure solution was carried out with direct methods using SuperFlip within the CRYSTALS software suite. Refinement was carried out using full-matrix least-squares within the CRYSTALS suite, on either F<sup>2</sup>. In general, all non-hydrogen atoms were refined with anisotropic displacement parameters.

## 2. EXPERIMENTAL PROCEDURES AND DATA

### 2.1 Substrate Synthesis

#### *N,N*-Dimethyl-3-(2-nitrophenyl)-3-oxopropanamide (**S1**)

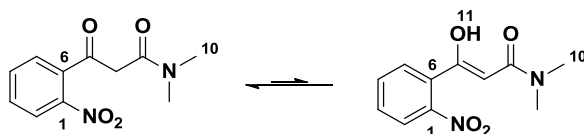

This compound was prepared by analogy to a literature procedure.<sup>3</sup> A solution of 2-nitrobenzoic acid (1.67 g, 10 mmol) in thionyl chloride (3 mL) was heated to reflux for two hours. The resulting brown solution was cooled to RT and the solvent removed *in vacuo* to afford the crude acid chloride. *n*-Butyllithium (1.6 M in hexanes, 12.5 mL, 20 mmol) was added dropwise to a solution of diisopropylamine (2.82 mL, 20 mmol) in diethyl ether (25 mL) at  $-78\text{ }^{\circ}\text{C}$  and the mixture allowed to warm to  $0\text{ }^{\circ}\text{C}$  for 15 min before cooling back to  $-78\text{ }^{\circ}\text{C}$ . *N,N*-Dimethyl acetamide (1.20 mL, 13 mmol) was added dropwise to the reaction mixture, and after 20 min a solution of the crude 2-nitrobenzoyl chloride in diethyl ether (10 mL) was added over 5 min. After a further 30 min the reaction mixture was quenched cautiously with hydrochloric acid (1 *N*, 30 mL) and the organic layer extracted with diethyl ether (2 x 10 mL), dried over anhydrous magnesium sulfate, filtered and concentrated *in vacuo*. The crude residue was purified by flash column chromatography (silica gel, petrol:ethyl acetate, 2:1  $\rightarrow$  1:1) to afford **S1** (870 mg, 38%, 10:7, *ketone:enol*) as a yellow amorphous solid.

Integrals are reported relative to the doublet corresponding to  $\text{H}_{2_{\text{ketone}}}$  at 8.11 ppm.

$\delta_{\text{H}}$  (400 MHz,  $\text{CDCl}_3$ ) 15.42 (0.70 H, s,  $\text{H}_{11_{\text{enol}}}$ ), 8.11 (1.00 H, d,  $J$  8.2,  $\text{H}_{2_{\text{ketone}}}$ ), 7.82 (0.79 H, d,  $J$  7.8,  $\text{H}_{2_{\text{enol}}}$ ), 7.75 (1.04 H, t,  $J$  7.3,  $\text{H}_{4_{\text{ketone}}}$ ), 7.68 (0.98 H, d,  $J$  7.3,  $\text{H}_{5_{\text{ketone}}}$ ), 7.66 – 7.51 (3.34 H, m,

H3<sub>ketone</sub>, H3<sub>enol</sub>, H4<sub>enol</sub> & H5<sub>enol</sub>), 5.54 (0.72 H, s, H8<sub>enol</sub>), 4.00 (2.00 H, s, H8<sub>ketone</sub>), 3.10 (3.01 H, s, H10<sub>ketone</sub>), 3.04 (4.54 H, s, H10<sub>ketone</sub>), 2.97 (2.97 H, s, H10'<sub>ketone</sub>).

$\delta_C$  (101 MHz, CDCl<sub>3</sub>) 196.3 (C7<sub>ketone</sub>), 171.6 (C9<sub>ketone</sub>), 170.1 (C9<sub>enol</sub>), 148.6 (C1<sub>enol</sub>), 145.4 (C1<sub>ketone</sub>), 137.2 (C6<sub>ketone</sub>), 134.6 (C4<sub>ketone</sub>), 132.5 (C3<sub>enol</sub>), 130.9 (C6<sub>enol</sub>), 130.8 (C3<sub>ketone</sub>), 130.6 (C4<sub>enol</sub>/C5<sub>enol</sub>), 130.0 (C4<sub>enol</sub>/C5<sub>enol</sub>), 128.7 (C5<sub>ketone</sub>), 124.1 (C2<sub>ketone</sub> & C2<sub>enol</sub>), 88.6 (C8<sub>enol</sub>), 48.7 (C8<sub>ketone</sub>), 37.9 (C10), 35.5 (C10').

$\nu_{\max}$  (neat): 2937, 1720, 1636, 1526, 1360, 1163, 800, 779 cm<sup>-1</sup>.

HRMS (ESI+): found 259.0697; C<sub>11</sub>H<sub>12</sub>N<sub>2</sub>NaO<sub>4</sub>, [M+Na]<sup>+</sup> requires 259.0689.

### 3-(2-Aminophenyl)-*N,N*-dimethyl-3-oxopropanamide (**1**)

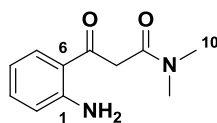

Palladium on activated carbon (10 wt%, 50 mg) was added to a stirred RT solution of nitroarene **S1** (500 mg, 2.43 mmol) in methanol (10 mL). The reaction mixture was purged under vacuum and placed under an atmosphere of hydrogen (balloon pressure). The resulting mixture was stirred vigorously for 30 min, filtered over Celite® and the solvent removed *in vacuo*. The crude residue was purified by single recrystallization from hot toluene to afford **1** as a yellow crystalline solid (394 mg, 79%).

$\delta_H$  (CDCl<sub>3</sub>, 400 MHz): 7.76 (1H, dd, *J* 8.4, 1.4, H5), 7.28 (1H, ddd, *J* 8.3, 7.0, 1.4, H3), 6.69–6.64 (2H, m, H2 & H4), 6.30 (2H, br s, NH<sub>2</sub>), 4.10 (2H, s, H8), 3.04 (3H, s, H10), 3.02 (3H, s, H10').

$\delta_{\text{C}}$  (CDCl<sub>3</sub>, 101 MHz):\* 195.8 (C7), 167.7 (C9), 150.8 (C1), 134.9 (C3), 131.7 (C5), 117.3 & 116.0 (C2 & C4), 46.6 (C8), 38.1 (C10), 35.6 (C10').

HRMS (ESI+): found 229.0954; C<sub>11</sub>H<sub>14</sub>N<sub>2</sub>NaO<sub>2</sub>, [M+Na]<sup>+</sup> requires 229.0947.

$\nu_{\text{max}}$  (neat): 3440 (NH<sub>2</sub>), 3329 (NH<sub>2</sub>), 3071 (CH), 2975 (CH), 2933 (CH), 1647 (ketone), 1614 (amide), 1393, 1145, 756 cm<sup>-1</sup>.

MP: 126–128 °C (toluene).

### ***tert*-Butyl 3-(2-nitrophenyl)-3-oxopropanoate (**S2**)**

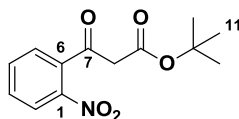

*This compound was prepared by analogy to a literature procedure.*<sup>3</sup> *n*-Butyllithium (1.6 M in hexanes, 30.3 mL, 48.5 mmol) was added to a stirred solution of diisopropylamine (6.84 mL, 48.5 mmol) in diethyl ether (60 mL) at –78 °C. The stirring solution was allowed to warm to 0 °C and was cooled to –78 °C after 15 min. *tert*-Butyl acetate (5.6 mL, 42 mmol) was added and the mixture was stirred for a further 20 min before adding 2-nitrobenzoyl chloride (4.29 mL, 32.3 mmol). The resulting turbid mixture was stirred for 30 min, hydrochloric acid (1 M aq., 100 mL) was added and the aqueous layer extracted with diethyl ether (3 x 50 mL), dried over anhydrous magnesium sulfate, filtered and concentrated *in vacuo*. The crude mixture was purified by flash column chromatography (silica gel, petrol:ethyl acetate, 20:1) to afford **S2** (4.55 g, 53%) as a viscous orange oil composed of a 7:1 mixture of ketone:enol tautomeric forms.<sup>†</sup>

\* The <sup>13</sup>C peak corresponding to C6 was not observed, and is presumed to coincide with another peak.

† The <sup>1</sup>H and <sup>13</sup>C data presented is for the major (ketone) tautomer. The presence of the enol as a minor component is asserted on the basis of characteristic OH (12.45 ppm) and C=CH (5.33) peaks in the <sup>1</sup>H spectrum.

$\delta_{\text{H}}$  (400 MHz,  $\text{CDCl}_3$ ): 8.15 (1H, dd,  $J$  8.2, 0.9, H2), 7.75 (1H, td,  $J$  7.5, 1.1, H4), 7.63 (1H, ddd,  $J$  8.2, 7.5, 1.3, H3), 7.51 (1H, dd,  $J$  7.6, 1.3, H5), 3.79 (2H, s, H8), 1.37 (9H, s, H11).

$\delta_{\text{C}}$  (101 MHz,  $\text{CDCl}_3$ ): 195.2 (C7), 165.7 (C9), 145.5 (C1), 136.9 (C6), 134.4 (C4), 130.8 (C3), 128.3 (C5), 124.2 (C2), 82.4 (C10), 50.4 (C8), 27.8 (C11).

$\nu_{\text{max}}$  (neat): 2980 (CH), 2935 (CH), 1731 (ketone), 1703 (ester), 1574 ( $\text{NO}_2$ ), 1346 ( $\text{NO}_2$ ), 1150, 853, 748  $\text{cm}^{-1}$ .

HRMS (ESI+): found 288.0843;  $\text{C}_{13}\text{H}_{15}\text{NO}_5\text{Na}$ ,  $[\text{M}+\text{Na}]^+$  requires 288.0842.

### ***tert*-Butyl 3-(2-aminophenyl)-3-oxopropanoate (S3)**

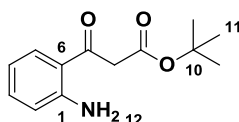

Palladium on activated carbon (10 wt%, 100 mg) was added to a stirred RT solution of nitroarene **S2** (1.0 g, 3.8 mmol) in methanol (20 mL). The reaction mixture was purged under vacuum and placed under an atmosphere of hydrogen (balloon pressure). The resulting mixture was stirred vigorously for 2.5 h, filtered over Celite® and the solvent removed *in vacuo*. The crude residue was purified flash column chromatography (silica gel, petrol:ethyl acetate, 8:2) to afford aniline **S3** (681 mg, 77%) as a pale yellow oil.\*

$\delta_{\text{H}}$  ( $\text{CDCl}_3$ , 400 MHz): 7.61 (1H, d,  $J$  7.3, H5), 7.28 (1H, td,  $J$  7.7, 0.5, H3), 6.68–6.62 (2H, m, H2 & H4), 6.28 (2H, br s, H12), 3.87 (2H, s, H8), 1.47 (9H, s, H11).

---

\* This compound is prone to RT decomposition to 4-hydroxyquinolin-2(1H)-one, and must be stored at  $-18\text{ }^{\circ}\text{C}$  under argon.

$\delta_{\text{C}}$  (CDCl<sub>3</sub>, 101 MHz):\* 195.0 (C7), 167.3 (C9), 150.7 (C1), 134.8 (C3), 131.4 (C5), 117.3 & 115.8 (C2 & C4), 81.7 (C10), 48.2 (C8), 28.0 (C11).

HRMS (ESI<sup>+</sup>): found 258.1106; C<sub>13</sub>H<sub>17</sub>NNaO<sub>3</sub>, [M+Na]<sup>+</sup> requires 258.1101.

$\nu_{\text{max}}$  (film): 3468 (NH<sub>2</sub>), 3351 (NH<sub>2</sub>), 2979 (CH), 1724 (C=O), 1646 (ester), 1616, 1368, 1138, 947, 748 cm<sup>-1</sup>.

### 3-(2-Nitrophenyl)-3-oxopropanenitrile (S4)

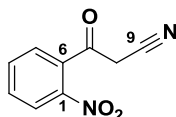

*This compound was prepared according to a literature procedure.*<sup>4</sup> Acetonitrile (1.74 mL, 33.1 mmol) was added dropwise to a stirred -78 °C solution of *n*-butyllithium (1.49 M in hexanes, 22 mL, 33.1 mmol) in tetrahydrofuran (20 mL). After 1 h methyl-2-nitrobenzoate (2.34 mL, 16.6 mmol) was added dropwise over 15 min, and the resulting mixture was stirred for a further 1 h before warming to -45 °C. After 2 h the reaction mixture was warmed to 0 °C and ammonium chloride (aq., 50 mL) was added. The aqueous layer was extracted with ethyl acetate (3 x 50 mL), dried over anhydrous sodium sulfate, filtered and concentrated *in vacuo*. The crude residue was purified by flash column chromatography (silica gel, petrol:ethyl acetate, 5:1 → 1:1) to afford nitroarene **S4** (1.34 g, 43%) as a red crystalline solid. *Data is consistent with that reported in the literature.*<sup>5</sup>

$\delta_{\text{H}}$  (CDCl<sub>3</sub>, 400 MHz): 8.26 (1H, d, *J* 8.3, H2), 7.85 (1H, td, *J* 7.5, 0.8, H4), 7.74 (1H, td, *J* 7.9, 1.9, H3), 7.48 (1H, dd, *J* 7.5, 0.9, H5), 3.91 (2H, s, H8).

---

\* The <sup>13</sup>C peak corresponding to C6 was not observed.

$\delta_{\text{C}}$  ( $\text{CDCl}_3$ , 101 MHz): 190.0 (C7), 145.1 (C1), 135.2 (C4), 134.7 (C6), 131.9 (C3), 127.6 (C5), 124.7 (C2), 113.3 (C9), 32.5 (C8).

$\nu_{\text{max}}$  (neat): 2971 (CH), 2908 (CH), 2268 ( $\text{C}\equiv\text{N}$ ), 1718 ( $\text{C}=\text{O}$ ), 1524 ( $\text{NO}_2$ ), 1340 ( $\text{NO}_2$ ), 1216, 1004, 743, 702  $\text{cm}^{-1}$ .

MP: 88–90 °C (ethyl acetate).

### 3-(2-Aminophenyl)-3-oxopropanenitrile (S5)

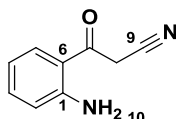

Palladium on activated carbon (10 wt%, 30 mg) was added to a stirred RT solution of nitroarene **S4** (300 mg, 1.58 mmol) in methanol (6 mL). The reaction mixture was purged under vacuum and placed under an atmosphere of hydrogen (balloon pressure). After 45 min the reaction mixture was filtered over Celite® and concentrated *in vacuo*. The crude residue was purified by passing over a short pad of silica gel, eluting with copious amounts of 1:1 petrol:ethyl acetate, and concentrated *in vacuo* to afford aniline **S5** (199 mg, 79%) as a white crystalline solid. *Data is consistent with that reported in the literature.*<sup>6</sup>

$\delta_{\text{H}}$  ( $\text{CDCl}_3$ , 400 MHz): 7.46 (1H, d,  $J$  8.2, H5), 7.34 (1H, t,  $J$  7.7, H3), 6.72–6.64 (2H, m, H2 & H4) 6.34 (2H, br s, H10), 4.07 (2H, s, H8).

$\delta_{\text{C}}$  ( $\text{CDCl}_3$ , 101 MHz): 188.1 (C7), 151.2 (C1), 135.9 (C3), 130.4 (C5), 117.7 (C2/C4), 116.2 (C2/C4), 115.2 (C6/C9), 114.4 (C6/C9), 30.1 (C8).

$\nu_{\text{max}}$  (neat): 3476 ( $\text{NH}_2$ ), 3364 ( $\text{NH}_2$ ), 2945 (CH), 2258 ( $\text{C}\equiv\text{N}$ ), 1647 ( $\text{C}=\text{O}$ ), 1617, 1544, 1451, 1208, 1158, 742  $\text{cm}^{-1}$ .

MP: 78–81 °C (dichloromethane).

**(±)-2-Benzyl-*N,N*-dimethyl-3-(2-nitrophenyl)-3-oxopropanamide (S6)**

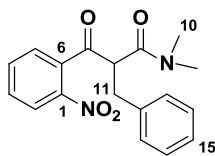

*This compound was prepared according to a modified literature procedure.*<sup>7</sup> Caesium carbonate (0.759 g, 2.66 mmol) was added to a stirred solution of nitroarene **S1** (550 mg, 2.66 mmol) in acetone (5 mL) at 0 °C and the resulting mixture allowed to warm to RT. Benzyl bromide (275  $\mu$ L, 2.66 mmol) was added dropwise and the reaction was stirred for 16 h. The reaction mixture was diluted with dichloromethane (25 mL) and ammonium chloride (aq., 15 mL) was added, and the aqueous layer was extracted with dichloromethane (3 x 10 mL). The combined organic extracts were dried over anhydrous magnesium sulfate, filtered and concentrated *in vacuo*. The crude residue was purified by flash column chromatography (silica gel, petrol:ethyl acetate, 3:1) to afford **S6** (587 mg, 77%) as a viscous yellow oil, which crystallized upon prolonged standing to a yellow solid.

$\delta_{\text{H}}$  (CDCl<sub>3</sub>, 400 MHz): 8.16 (1H, dd, *J* 8.3, 0.8, H2), 7.73 (1H, dt, *J* 7.5, 1.1, H4), 7.60 (1H, ddd, *J* 8.2, 7.5, 1.3, H3), 7.53 (1H, dd, *J* 7.6, 1.3, H5), 7.36–7.16 (5H, m, H13–H15), 4.50–4.44 (1H, m, H8), 3.31 (2H, d, *J* 7.8, H11), 2.75 (3H, s, H10), 2.44 (3H, s, H10').

$\delta_{\text{C}}$  (CDCl<sub>3</sub>, 101 MHz): 198.2 (C7), 168.8 (C9), 145.1 (C1), 138.1 (C12), 136.9 (C6), 134.6 (C4), 130.3 (C3), 129.0 (C5), 129.0 & 128.5 (C13 & C14), 126.8 (C15), 124.1 (C2), 57.3 (C8), 37.4 (C10), 35.8 (C11), 35.7 (C10').

HRMS (ESI<sup>+</sup>): found 349.1159; C<sub>18</sub>H<sub>18</sub>N<sub>2</sub>NaO<sub>4</sub>, [M+Na]<sup>+</sup> requires 349.1159.



$\nu_{\max}$  (neat): 3062 (CH), 3030 (CH), 2930 (CH), 1719 (ketone) 1626 (amide), 1526 (NO<sub>2</sub>), 1343 (NO<sub>2</sub>), 750, 692 cm<sup>-1</sup>.

MP: 62–66 °C (chloroform).

**(±)-3-(2-Aminophenyl)-2-benzyl-*N,N*-dimethyl-3-oxopropanamide (28)**

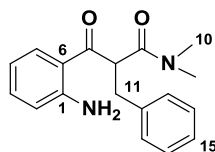

Palladium on activated carbon (10 wt%, 28 mg) was added to a stirred RT solution of nitroarene **S6** (280 mg, 0.86 mmol) in methanol (5 mL). The reaction mixture was purged under vacuum and placed under an atmosphere of hydrogen (balloon pressure). The resulting mixture was stirred vigorously for two hours, filtered over Celite® and the solvent removed *in vacuo*. The crude residue was purified by flash column chromatography (silica gel, petrol:ethyl acetate, 3:2) to afford **28** as a yellow crystalline solid (180 mg, 71%).

$\delta_{\text{H}}$  (CDCl<sub>3</sub>, 400 MHz): 7.58 (1H, d, *J* 8.2, H5), 7.30–7.18 (6H, m, H3, H13–H15), 6.67 (1H, d, *J* 8.3, H2), 6.60 (1H, t, *J* 7.5, H4), 6.33 (2H, br s, NH<sub>2</sub>), 4.68 (1H, dd, *J* 8.6, 5.3, H8), 3.45 (1H, dd, *J* 13.9, 8.5, H11), 3.22 (1H, dd, *J* 13.9, 5.2, H11'), 2.93 (3H, s, H10), 2.78 (3H, s, H10').

$\delta_{\text{C}}$  (CDCl<sub>3</sub>, 101 MHz): 197.4 (C7), 169.6 (C9), 151.3 (C1), 139.6 (C12), 134.6 (C3), 130.0 (C5), 129.1 & 129.1 (C13 & C14), 126.5 (C15), 117.7 (C2), 116.6 (C6), 115.8 (C4), 54.5 (C8), 37.1 (C10), 35.9 (C10'), 35.8 (C11).

HRMS (ESI<sup>+</sup>): found 319.1413; C<sub>18</sub>H<sub>20</sub>N<sub>2</sub>NaO<sub>2</sub>, [M+Na]<sup>+</sup> requires 319.1417.

$\nu_{\max}$  (neat): 3433 (NH<sub>2</sub>), 3314 (NH<sub>2</sub>), 3032 (CH), 2934 (CH), 1651 (ketone), 1614 (amide), 1484, 1257, 749, 696 cm<sup>-1</sup>.

MP: 103–109 °C (chloroform).

## 2.2 Synthesis of Catalysts

### 2,6-Bis(4-(*R*)-phenyloxazolin-2-yl)pyridine (**3**)

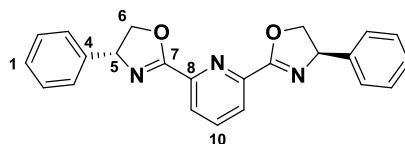

*This compound was prepared according to a literature procedure.*<sup>8</sup> A stirred neat mixture of (*R*)-phenylglycinol (4.85 g, 35.4 mmol) and dimethyl-2,6-pyridine dicarboxylate (3.45 g, 17.7 mmol) was heated to 120 °C. After 16 h the crude mixture was allowed to cool to RT and dissolved in dichloromethane (20 mL). Triethylamine (10 mL) and *para*-toluenesulfonyl chloride (6.80 g, 35.4 mmol) were added, and the mixture was heated to reflux. After 20 h the reaction mixture was allowed to cool to RT, and water (20 mL) was added. The aqueous layer was extracted with dichloromethane (3 x 10 mL) and the combined organic extracts dried over anhydrous magnesium sulfate, filtered and concentrated *in vacuo*. The crude solid residue obtained was purified by single recrystallization (ethanol) to afford (*R*)-phenyl PyBOX **3** (4.63 g, 71%) as a white crystalline solid. *Data is consistent with that reported in the literature.*<sup>9</sup>

$\delta_{\text{H}}$  (400 MHz,  $\text{CDCl}_3$ ): 8.36 (2H, d,  $J$  7.9, H9), 7.93 (1H, t,  $J$  7.8, H10), 7.41–7.28 (10H, m, H1, H2 & H3), 5.47 (2H, dd,  $J$  10.3, 8.6, H5), 4.94 (2H, dd,  $J$  10.3, 8.7, H6), 4.44 (2H, t,  $J$  8.6, H6').

$\delta_{\text{C}}$  (101 MHz,  $\text{CDCl}_3$ ): 163.5 (C7), 146.8 (C8), 141.7 (C4), 137.5 (C10), 128.8 (C2/C3), 127.8 (C1), 126.8 (C2/C3), 126.3 (C9), 75.5 (C6), 70.4 (C5).

MP: 153–156 °C (ethanol).

**(R)-Dimethyl BINOL (S7)**

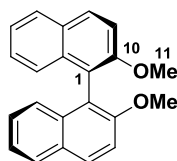

*This compound was prepared according to a literature procedure.*<sup>10</sup> Acetone (200 mL) was added to a flask containing (R)-BINOL\* (14 g, 49 mmol) and warmed until all of the diol was dissolved. Potassium carbonate (22.8 g, 166 mmol) and iodomethane (18.4 mL, 293 mmol) were added, and the resulting mixture was heated under reflux for 24 h. The mixture was allowed to cool to RT and concentrated *in vacuo* to a volume of approximately 50 mL. Water (500 mL) was added, and the mixture stirred for 8 h at RT. The solid residue was obtained by filtration, and washed with water (3 x 200 mL) to afford **S7** (15.3 g, 99%) as a white powder. *Data is consistent with that reported in the literature.*<sup>10</sup>

$\delta_{\text{H}}$  (400 MHz,  $\text{CDCl}_3$ ): 8.00 (2H, d,  $J$  9.0, H8), 7.89 (2H, d,  $J$  8.1, H3), 7.48 (2H, d,  $J$  9.1, H9), 7.34 (2H, ddd,  $J$  8.1, 6.8, 1.2, H4), 7.23 (2H, ddd,  $J$  8.4, 6.8, 1.4, H5), 7.13 (2H, d,  $J$  8.2, H6), 3.78 (6H, s, H11).

$\delta_{\text{C}}$  (101 MHz,  $\text{CDCl}_3$ ): 155.0 (C10), 134.0 (C2), 129.4 (C8), 129.2 (C7), 127.9 (C3), 126.3 (C5), 125.3 (C6), 123.5 (C4), 119.6 (C1), 114.3 (C9), 56.9 (C11).

MP = 230–235 °C (diethyl ether/petrol).

$[\alpha]_{\text{D}}^{20.0} +56.6$  ( $c$  = 1.0,  $\text{CHCl}_3$ ).

$\nu_{\text{max}}$  (neat): 3048 (CH), 3021 (CH), 2956 (CH), 2933 (CH), 1619, 1591, 1250, 1065, 811  $\text{cm}^{-1}$ .

---

\* (R)-BINOL was purchased from AK Scientific, Union City, CA, USA.

**(R)-3,3'-Dibromo-dimethyl BINOL (S8)**

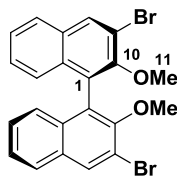

*This compound was prepared according to a literature procedure.*<sup>10</sup> *n*-Butyllithium (1.6 M in hexanes, 35 mL, 56 mmol) was slowly added to a stirred RT solution of tetramethylenediamine (5.21 mL, 35 mmol) in diethyl ether (250 mL). After 1 h (R)-dimethyl BINOL **S7** (5.0 g, 16 mmol) was added, and the mixture was stirred for a further 3.5 h before cooling to  $-78^{\circ}\text{C}$ . Bromine (4.1 mL, 80 mmol) was added, and the mixture was allowed to warm to RT and stirred for a further 20 h. Sodium sulfite (aq., 80 mL) was added, and the biphasic mixture stirred for 1 h, before the aqueous phase was extracted with diethyl ether (3 x 100 mL). The combined organic extracts were washed with brine (100 mL), dried over anhydrous magnesium sulfate, filtered and concentrated *in vacuo*. The crude residue was purified by flash column chromatography (silica gel, petrol:ethyl acetate, 1:0  $\rightarrow$  20:1) and subsequent recrystallization (dichloromethane/petrol), affording (R)-3,3'-dibromo-dimethyl BINOL **S8** as a white crystalline solid (3.33 g, 44%). *Data is consistent with that reported in the literature.*<sup>10</sup>

$\delta_{\text{H}}$  (400 MHz,  $\text{CDCl}_3$ ): 8.28 (2H, s, H8), 7.83 (2H, d,  $J$  8.2, H3), 7.43 (2H, ddd,  $J$  8.0, 7.1, 1.0, H4), 7.28 (2H, ddd,  $J$  8.4, 7.0, 1.3, H5), 7.09 (2H, d,  $J$  8.5, H6), 3.52 (6H, s, H11).

$\delta_{\text{C}}$  (101 MHz,  $\text{CDCl}_3$ ): 152.5 (C10), 133.1 (C2), 133.0 (C8), 131.4 (C7), 127.1 (C3), 126.9 (C5), 126.5 (C1), 125.9 (C4), 125.8 (C6), 117.5 (C9), 61.1 (C11).

MP: 182-187  $^{\circ}\text{C}$  (dichloromethane/petrol).

$[\alpha]_{\text{D}}^{20.0}$  -14.0 ( $c$  = 1.0,  $\text{CHCl}_3$ ).

$\nu_{\text{max}}$  (neat): 3056 (CH), 1575, 1493, 1328, 1043, 750  $\text{cm}^{-1}$ .

**(*R*)-3,3'-Bis(2,4,6-triisopropylphenyl)-BINOL (S9)**

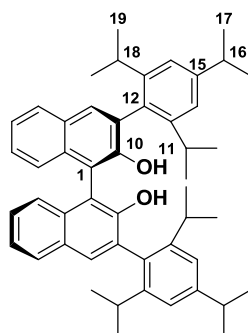

*This compound was prepared according to a literature procedure.*<sup>11</sup> Mechanically-activated magnesium turnings (1.26 g, 52 mmol) were covered with diethyl ether (~ 3 mL) and further activated by the addition of a single crystal of iodine. 2-Bromo-1,3,5-triisopropylbenzene (6.86 mL, 26 mmol), diethyl ether (35 mL) and 1,2-dibromoethane (0.1 mL) were added separately and simultaneously *via* syringe in a manner that maintained the exothermic reaction, and the grey solution was heated to reflux for a further 24 h. The resulting Grignard solution was filtered over a pad of cotton wool and used without further purification in the subsequent step.

In a separate flask, dibromoarene **S8** (2.00 g, 4.26 mmol) and bis(triphenylphosphine)nickel(II) chloride\* (277 mg, 0.42 mmol) were suspended in diethyl ether (25 mL). The Grignard solution was added dropwise to the suspension, and the mixture heated to reflux for 6 h. The resulting brown solution was allowed to cool to RT and hydrochloric acid (1.0 M aq., 30 mL), and the aqueous layer was extracted with diethyl ether (3 x 25 mL), dried over anhydrous magnesium sulfate, filtered and concentrated *in vacuo*.

The crude product of the Kumada coupling was dissolved in anhydrous dichloromethane (100 mL) and cooled to 0 °C. Boron tribromide (1.0 M in dichloromethane, 29.7 mL,

---

\* *This compound was prepared according to* L. M. Venanzi, *J. Chem. Soc.*, **1958**, 719.

29.7 mmol) was added dropwise, and the resulting clear solution allowed to warm to RT and stirred for a further 24 h. Water (40 mL) was added, and the aqueous layer extracted with dichloromethane (3 x 25 mL). The combined organic extracts were dried over anhydrous magnesium sulfate, filtered and concentrated *in vacuo*. The crude brown residue was purified by flash column chromatography (silica gel, petrol:ethyl acetate, 100:1), and the resulting yellow solid was triturated with hexanes, affording diol **S9** (1.26 g, 43% over two steps) as a white powder. *Data is consistent with that reported in the literature.*<sup>11</sup>

$\delta_{\text{H}}$  (400 MHz,  $\text{CDCl}_3$ ): 7.89 (2H, d,  $J$  7.9, H3), 7.79 (2H, s, H8), 7.42–7.37 (2H, m, H4), 7.36–7.29 (4H, m, H5 & H6), 7.16 (2H, s, H14), 7.14 (2H, s, H14'), 4.94 (2H, s, H11), 2.98 (2H, septet,  $J$  6.9, H16), 2.86 (2H, septet,  $J$  6.8, H18), 2.71 (2H, septet,  $J$  6.8, H18'), 1.33 (12H, d,  $J$  6.9, H17), 1.22 (6H, d,  $J$  6.8, H19) 1.13 (6H, d,  $J$  7.0, H19), 1.11 (6H, d,  $J$  7.0, H19'), 1.05 (6H, d,  $J$  6.8, H19').

$\delta_{\text{C}}$  (101 MHz,  $\text{CDCl}_3$ ): 150.6 (C10), 149.1 (C15), 147.8 (C13), 147.7 (C13'), 133.4 (Ar C), 130.6 (C8), 130.4 (Ar C), 129.1 (Ar C), 129.0 (Ar C), 128.2 (C3), 126.6 (C5/C6), 124.5 (C5/C6), 123.8 (C4), 121.2 (C14), 121.2 (C14'), 113.1 (C1), 34.3 (C16), 30.9 (C18), 30.8 (C18'), 24.3 (C17/C19), 24.3 (C17/C19), 24.1 (C17/C19), 24.0 (C17/C19), 23.9 (C17/C19), 23.7 (C17/C19).

MP: 268–274 °C (ethyl acetate/hexanes).

$[\alpha]_{\text{D}}^{20.0} +68.9$  ( $c = 1.0$ ,  $\text{CHCl}_3$ ).

$\nu_{\text{max}}$  (neat): 3524 (OH), 2960 (CH), 2928 (CH), 2869 (CH), 1739, 1364, 1230, 1217, 749  $\text{cm}^{-1}$ .

### *N*-Triflylphosphoramidate S10

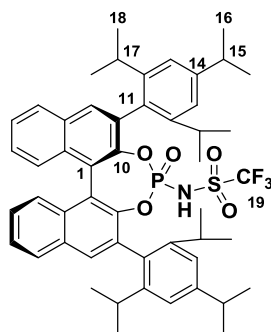

*This compound was prepared according to a literature procedure.*<sup>12</sup> Triethylamine (707  $\mu$ L, 5.07 mmol), phosphoryl chloride (81  $\mu$ L, 0.87 mmol) and 4-dimethylaminopyridine (177 mg, 1.45 mmol) were added to a stirred RT solution of bis(aryl) BINOL **S9** (500 mg, 0.72 mmol) in dichloromethane (3.5 mL). After 1 h propionitrile (3.5 mL) and trifluoromethanesulfonamide (216 mg, 1.45 mmol) were added, and the mixture heated to 100  $^{\circ}$ C. After 12 h water (5 mL) was added, and the aqueous layer extracted with diethyl ether (3 x 5 mL). The combined organic extracts were washed with sodium bicarbonate solution (aq., 5 mL) and hydrochloric acid (4 M, 2 x 5 mL), dried over anhydrous sodium sulfate, filtered and concentrated *in vacuo*. The solid residue was purified by flash column chromatography (silica gel, hexanes: dichloromethane:diethyl ether, 1:1:1), to afford the product as a mixture of the free acid and calcium salt. This residue was dissolved in dichloromethane (25 mL), washed with hydrochloric acid (4.0 M aq., 2 x 10 mL), dried over anhydrous sodium sulfate, filtered and concentrated *in vacuo* to afford triflamide **S10** (545 mg, 86%) as a pale orange powder. *Data is consistent with that reported in the literature.*<sup>12</sup> *This compound was obtained as a 10:1 inseparable mixture of the desired NTPA and phosphoric acid TRIP.*

$\delta_{\text{H}}$  (500 MHz,  $\text{CDCl}_3$ ): 8.00–7.95 (4H, m, H3 & H8), 7.57 (2H, t,  $J$  7.4, H4), 7.39–7.27 (4H, m, H5 & H6), 7.18 (1H, d,  $J$  1.6, H13), 7.13 (2H, d,  $J$  0.9, 2 x H13), 7.06 (1H, d,  $J$  1.6, H13), 3.00–2.90 (2H, m, 2 x H15), 2.80–2.69 (2H, m, 2 x H17), 2.66 (1H, septet,  $J$  6.9, H17), 2.58 (1H,

septet,  $J$  6.7, H17), 1.32–1.24 (15H, m, 12 x H16 & 3 x H18), 1.24–1.13 (12H, m, 12 x H18), 1.11 (3H, d,  $J$  6.8, 3 x H18), 1.00 (3H, d,  $J$  6.8, 3 x H18), 0.96 (3H, d,  $J$  6.8, 3 x H18).

$\delta_{\text{C}}$  (126 MHz,  $\text{CDCl}_3$ ): 149.7 (C14), 149.1 (C14'), 147.9 (C12), 147.8 (C12), 147.1 (C12), 146.6 (C12), 145.4 (d,  $J$  11.0, C10), 144.7 (d,  $J$  9.0, C10'), 133.2 (C8), 133.0 (C8'), 132.3 (d,  $J$  2.9, C9), 132.1 (C7), 131.6 (C2), 131.2 (C2'), 130.5 (d,  $J$  4.4, C9'), 130.1 (C11), 129.9 (C11), 128.4(1) (C3), 128.3(6) (C3'), 127.3 (C6), 126.8 (C5), 126.7 (C5'), 126.4(0) (C4), 126.3(5) (C4'), 121.8 (C13), 121.2 (2 x C13), 121.1 (C1), 120.4 (C13), 118.8 (q,  $J$  322, C19), 34.5 (C15), 34.3 (C15'), 31.4 (C17), 31.0(4) (C17), 30.9(7) (C17), 30.5 (C17), 26.9 (C16/C18), 26.7 (C16/C18), 25.4 (C16/C18), 25.1 (C16/C18), 24.1 (C16/C18), 24.0 (C16/C18), 23.9(1) (C16/C18), 23.8(7) (C16/C18), 23.0 (C16/C18), 22.9 (C16/C18), 22.8 (C16/C18), 22.6 (C16/C18).

$\delta_{\text{F}}$  (470 MHz,  $\text{CDCl}_3$ ): 77.4.

$\delta_{\text{P}}$  (202 MHz,  $\text{CDCl}_3$ ): -1.98.

MP: 170–175 °C (dichloromethane).

$[\alpha]_{\text{D}}^{20.0}$  -24.1 ( $c$  = 1.0,  $\text{CHCl}_3$ ).

$\nu_{\text{max}}$  (neat): 2961 (CH), 2870 (CH), 1738, 1364, 1227, 975, 751  $\text{cm}^{-1}$ .

HRMS (ES-): found 882.3572;  $\text{C}_{51}\text{H}_{56}\text{F}_3\text{NO}_5\text{PS}$ ,  $[\text{M}-\text{H}]^-$  requires 882.3574.



### Silver(I) NTPA (**S11**)

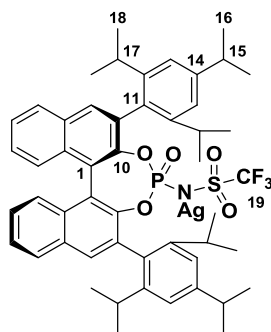

This compound was prepared by analogy to a literature procedure.<sup>13</sup> Where possible, all steps of this procedure were carried out in the dark. Silver(I) carbonate (31.2 mg, 0.113 mmol) and water (2 mL) were added to a stirred solution of triflamide **S10** (200 mg, 0.226 mmol) in dichloromethane (2 mL). The resulting biphasic solution was stirred vigorously for 1 h, diluted with dichloromethane (5 mL) and water (5 mL) and the organic layer extracted with dichloromethane (3 x 5 mL). The organic extracts were filtered over Celite® and concentrated *in vacuo* to afford silver salt **S11** (214 mg, 96%) as a pale grey powder which was stored in the dark.

$\delta_{\text{H}}$  (500 MHz,  $\text{CDCl}_3$ ): 7.97 (1H, d,  $J$  8.3, H3), 7.95 (1H, s, H8), 7.91 (1H, d,  $J$  7.9, H3'), 7.90 (1H, s, H8'), 7.53 (1H, t,  $J$  7.4, H4), 7.49 (1H, ddd,  $J$  8.0, 5.8, 2.2, H4'), 7.36–7.27 (5H, m, 2 x H5, 2 x H6, H13), 7.14 (1H, s, H13), 7.06 (1H, s, H13), 7.03 (1H, s, H13), 3.04–2.94 (1H, m, H15), 2.94–2.85 (2H, m, 2 x H15/H17), 2.85–2.77 (2H, m, 2 x H15/H17), 2.67 (1H, septet,  $J$  6.7, H15/H17), 1.34–1.22 (24H, m, 24 x H16/H18), 1.20 (3H, d,  $J$  6.7, 3 x H16/H18), 1.15 (3H, d,  $J$  6.8, 3 x H16/H18), 1.02 (3H, d,  $J$  6.7, 3 x H16/H18), 0.91 (3H, d,  $J$  6.8, 3 x H16/H18).

$\delta_{\text{C}}$  (126 MHz,  $\text{CDCl}_3$ ): 151.4 (C14), 148.5 (C14'), 148.4 (C12), 147.6 (2 x C12), 147.2 (C12), 146.9 (d,  $J$  11.0, C10), 145.4 (d,  $J$  9.0, C10'), 132.9 (C8), 132.7 (Ar C), 132.3 (Ar C), 132.1 (Ar C), 132.1 (C11), 131.5 (C8'), 131.3 (Ar C), 131.3 (C11'), 130.8 (Ar C), 130.7 (Ar C), 128.3 (C3), 128.1 (C3'), 127.5 (C5), 127.4 (C5'), 126.4 (C6), 126.0 (C6'), 125.8 (C4), 125.5 (C4'), 123.0 (C1), 121.7(3) (C13), 121.6(6) (C13), 121.2 (C1'), 120.4 (2 x C13'), 34.3 (C15), 34.2 (C15'), 31.6 (C17), 31.0

(C17), 30.8 (2 x C17), 26.9 (C16/C18), 26.6 (C16/C18), 25.2 (C16/C18), 25.2 (2 x C16/C18), 24.8 (C16/C18), 24.3 (C16/C18), 24.1 (C16/C18), 24.8 (C16/C18), 23.3 (2 x C16/C18), 22.2 (C16/C18).

$\delta_p$  (202 MHz, CDCl<sub>3</sub>): 6.81.

$\delta_F$  (470 MHz, CDCl<sub>3</sub>): -77.87.

MP: 236–242 °C (dichloromethane).

$[\alpha]_D^{20.0}$  -38.9 ( $c$  = 0.61, CHCl<sub>3</sub>).

$\nu_{\max}$  (neat): 2962 (CH), 1364, 1314, 1194, 974 cm<sup>-1</sup>.

HRMS (MALDI+): found 1010.12; C<sub>51</sub>H<sub>58</sub>AgF<sub>3</sub>NO<sub>6</sub>PS, [M+H<sub>3</sub>O]<sup>+</sup> requires 1010.28; *isotope pattern consistent with Ag(I) salt*.

### Copper(II) NTPA Salt (7)

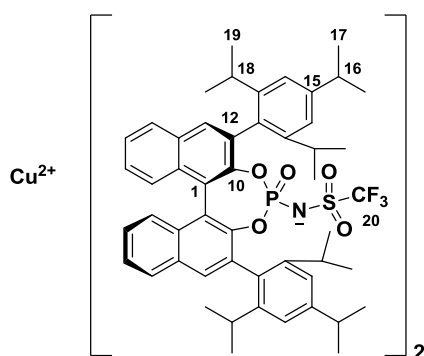

*This compound was prepared by analogy to a literature procedure.<sup>14</sup> Where possible, all steps of this procedure were carried out in the dark.* Copper(II) chloride dihydrate (9.5 mg, 0.056 mmol) was added to a stirred RT solution of silver salt **S11** (100 mg, 0.101 mmol) in acetonitrile:dichloromethane (1:1 v/v, 2 mL). After 16 h the reaction mixture was filtered over Celite® and concentrated *in vacuo*. The solid residue was redissolved in dichloromethane (5 mL) and filtered over Celite®, washing

with dichloromethane (1 mL), and the solvent removed *in vacuo* to afford **7** (72 mg, 78%) as a green/grey solid. *Note that due to the paramagnetic nature of the copper(II) ion it was not possible to carry out NMR analysis of this compound.*

MP: 241–244 °C (dichloromethane).

$[\alpha]_{\text{D}}^{20.0}$  -33.8 ( $c = 0.29$ ,  $\text{CHCl}_3$ ).

$\nu_{\text{max}}$  (neat): 2961 (CH), 2871 (CH), 1196, 1146, 999, 751  $\text{cm}^{-1}$ .

$m/z$  ( $\text{ESI}^+$ ):\* 1850 ( $[\text{M}+\text{Na}]^+$ , 71%), 1828 ( $[\text{M}+\text{H}]^+$ , 53%), 928.3 ( $[\text{NTPA}^-+2\text{Na}]^+$ , 100%).

## 2.3 Synthesis of Dihydroquinolones

### ***General Procedure 1 – Asymmetric Synthesis of Dihydroquinolones***

The appropriate aldehyde (2.0 eq.) was added to a stirred -30 °C suspension of the appropriate aniline (1.0 eq.), oven-dried 4 Å molecular sieves (1 mg / 1 mg aniline) and copper catalyst **7** (0.01 eq.) in 1:1 tetrahydrofuran:toluene (v:v, 0.2 M concentration of aniline). After 48 h the product dihydroquinolone was obtained by work-up procedure A or B.<sup>†</sup>

Work-up procedure A. The solvent was removed *in vacuo*, and the residue purified by flash column chromatography on silica gel.

Work-up procedure B. The reaction mixture was poured into dichloromethane (200 mL / mmol aniline) and passed over a short plug of silica gel to remove the catalyst. The solvent was removed *in vacuo*, and the residue purified by flash column chromatography on silica gel.

### ***General Procedure 2– Racemic Synthesis of Dihydroquinolones***

---

\* “NTPA<sup>-</sup>” refers to the conjugate base anion of the neutral N-triylphosphoramidate **S10**.

<sup>†</sup> Work-up procedure A should be employed where TLC and MS indicate that the reaction has gone to completion, with no residual aniline remaining. Otherwise, work-up procedure B is necessary to prevent further reaction at RT, which would give mis-representative yields and enantioselectivities. Quenching these reactions with acid or base is not possible, since both the free acid and salt forms of the catalyst are active.

***N,N*-Dimethyl-4-oxo-2-phenyl-1,2,3,4-tetrahydroquinoline-3-carboxamide (2)**

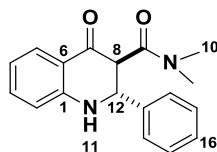

***Asymmetric:*** prepared according to ***general procedure 1***. Aniline **1** (50 mg, 0.24 mmol), benzaldehyde (49  $\mu$ L, 0.48 mmol). *Work-up procedure A* was employed: chromatography (silica gel, dichloromethane:methanol, 100:1). The product dihydroquinolone **2** (64 mg, 90%, 83:17 e.r., >20:1 dr) was obtained as a yellow foam.

***Racemic:*** prepared according to ***general procedure 2***.

$\delta_{\text{H}}$  ( $\text{CDCl}_3$ , 400 MHz): 7.89 (1H, dd,  $J$  7.9, 1.5, H5), 7.55 (2H, dd,  $J$  7.7, 1.7, H14), 7.39–7.33 (4H, m, H3, H15, H16), 6.79 (1H, t,  $J$  7.5, H4), 6.70 (1H, d,  $J$  8.2, H2), 5.25 (1H, d,  $J$  12.9, H12), 4.50 (1H, br s, H11), 4.15 (1H, d,  $J$  13.1, H8), 2.87 (3H, s, H10), 2.85 (3H, s, H10').

$\delta_{\text{C}}$  ( $\text{CDCl}_3$ , 101 MHz): 189.6 (C7), 167.9 (C9), 151.2 (C1), 139.7 (C13), 135.7 (C3), 128.7 (C14), 128.6 (C16), 128.0 (C5), 127.6 (C15), 118.6 (C6), 118.5 (C4), 115.8 (C2), 60.7 (C12), 57.6 (C8), 37.5 (C10), 35.5 (C10').

HRMS (ESI+): found 317.1261;  $\text{C}_{18}\text{H}_{18}\text{N}_2\text{NaO}_2$ ,  $[\text{M}+\text{Na}]^+$  requires 317.1260.

$\nu_{\text{max}}$  (neat): 3282 (NH), 3034 (CH), 2940 (CH), 1659 (ketone), 1632 (amide), 1510, 1481, 1331, 1303, 760, 662  $\text{cm}^{-1}$ .

MP: 203–208  $^{\circ}\text{C}$  (dichloromethane).

HPLC (Chiralpak OD-H, 30% IPA, 70% hexane, 1.0  $\text{mL}\cdot\text{min}^{-1}$ ,  $\lambda = 245$ ):  $t_{\text{R}}$  (major) = 8.1,  $t_{\text{R}}$  (minor) = 14.4.

$[\alpha]_{\text{D}}^{20.0} +60.4$  ( $c = 1$ ,  $\text{CHCl}_3$ ).

**4-Oxo-2-phenyl-1,2,3,4-tetrahydroquinoline-3-carbonitrile (8)**

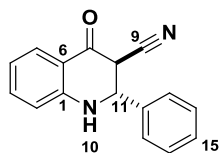

**Attempted asymmetric synthesis:** prepared according to *general procedure 1*. Aniline **S5** (50 mg, 0.31 mmol), benzaldehyde (64  $\mu\text{L}$ , 0.62 mmol). *Work-up procedure B* was employed: chromatography (silica gel, petrol:ethyl acetate, 4:1). The product dihydroquinolone **8** (49 mg, 63%, *racemic*, 4:1 dr) was obtained as a yellow crystalline solid. *Although the diastereomers were inseparable by column chromatography, a pure sample of the major diastereomer was obtained by single recrystallization (dichloromethane/petrol).*

*Major (as drawn):*  $\delta_{\text{H}}$  (400 MHz,  $\text{d}_6$ -acetone): 7.78 (1H, d,  $J$  7.6, H5), 7.68 (2H, d,  $J$  6.5, H13), 7.52–7.41 (4H, m, H3, H14, H15), 7.02 (1H, d,  $J$  8.3, H2), 6.81 (1H, t,  $J$  7.6, H4), 6.59 (1H, br s, H10), 4.99 (1H, d,  $J$  13.1, H11), 4.55 (1H, d,  $J$  13.2, H8).

$\delta_{\text{C}}$  (101 MHz,  $\text{d}_6$ -acetone): 184.4 (C7), 152.2 (C1), 138.6 (C12), 136.5 (C3), 129.6 (C15), 129.2 (C14), 128.3 (C13), 127.8 (C5), 118.5 (C4), 117.0 (C6/C9), 116.9 (C2), 115.5 (C6/C9), 60.9 (C11), 48.1 (C8).

HRMS (ESI<sup>+</sup>): found 271.0839;  $\text{C}_{16}\text{H}_{12}\text{N}_2\text{NaO}$ ,  $[\text{M}+\text{Na}]^+$  requires 271.0842.

$\nu_{\text{max}}$  (film): 3350 (NH), 2891 (CH), 2252 ( $\text{C}\equiv\text{N}$ ), 1661, 1609, 1481, 1455, 1335, 752, 705  $\text{cm}^{-1}$ .

MP: 164–168  $^{\circ}\text{C}$  (dichloromethane/petrol).

HPLC (Chiralpak AS, 50% IPA, 50% hexane, 1.0  $\text{mL}\cdot\text{min}^{-1}$ ,  $\lambda = 245$ ):  $t_{\text{R}}(1) = 8.6$ ,  $t_{\text{R}}(2) = 11.4$ .

***tert*-Butyl 4-oxo-2-phenyl-1,2,3,4-tetrahydroquinoline-3-carboxylate (**9**)**

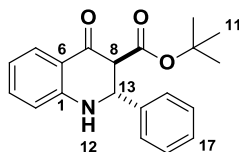

**Asymmetric:** prepared according to *general procedure 5*. Aniline **S3** (100 mg, 0.42 mmol), benzaldehyde (86  $\mu$ L, 0.84 mmol). *Work-up procedure B* was employed: chromatography (silica gel, petrol:ethyl acetate, 20:1). The product dihydroquinolone **9** (47 mg, 34%, 32:68 e.r., >20:1 dr, ~10:1 *ketone:enol*) was obtained as a yellow oil.

**Racemic:** prepared according to *general procedure 2*.

$\delta_{\text{H}}$  (400 MHz,  $\text{CDCl}_3$ ): 7.88 (1H, d,  $J$  8.0, 1.2, H5), 7.51 (2H, dd,  $J$  7.6, 1.7, H15), 7.42–7.31 (4H, m, H3, H16 & H17), 6.80 (1H, td,  $J$  7.2, 0.7, H4), 6.69 (1H, d,  $J$  8.1, H2), 4.97 (1H, d,  $J$  13.1, H13), 4.54 (1H, br s, H12), 3.76 (1H, d,  $J$  13.1, H8), 1.29 (9H, s, H11).

$\delta_{\text{C}}$  (101 MHz,  $\text{CDCl}_3$ ): 189.2 (C7), 167.2 (C9), 150.8 (C1), 138.5 (C14), 135.7 (C3), 128.9 (C17), 128.7 (C16), 127.9 (C5), 127.8 (C15), 118.6 (C4), 118.4 (C6), 115.7 (C2), 81.8 (C10), 61.8 (C8), 60.6 (C13), 27.8 (C11).

HRMS (ESI<sup>+</sup>): found 346.1402;  $\text{C}_{20}\text{H}_{21}\text{NNaO}_3$ ,  $[\text{M}+\text{Na}]^+$  requires 346.1414.

$\nu_{\text{max}}$  (film): 3342 (NH), 2979 (CH), 2932 (CH), 1725 (C=O), 1665, 1611, 1482, 1334, 1296, 1148, 910, 730  $\text{cm}^{-1}$ .

$[\alpha]_{\text{D}}^{20.0} +35.4$  ( $c$  = 1,  $\text{CHCl}_3$ ).

HPLC (Chiralpak ADH, 5% IPA, 95% hexane, 1.0  $\text{mL}\cdot\text{min}^{-1}$ ,  $\lambda$  = 245):  $t_{\text{R}}(\text{minor})$  = 8.2,  $t_{\text{R}}(\text{major})$  = 15.4.

2-(2-Chlorophenyl)-*N,N*-dimethyl-4-oxo-1,2,3,4-tetrahydroquinoline-3-carboxamide

(10)

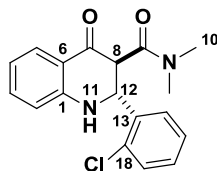

**Asymmetric:** prepared according to *general procedure 1*. Aniline **1** (50 mg, 0.24 mmol), 2-chlorobenzaldehyde (54  $\mu$ L, 0.48 mmol). After 48 h incomplete conversion was observed by TLC analysis. An additional aliquot of *o*-chlorobenzaldehyde (54  $\mu$ L, 0.48 mmol) and catalyst **7** (4.4 mg, 2.4  $\mu$ mol) was added, and the reaction stirred for a further 24 h. Work-up procedure A was employed: chromatography (silica gel, dichloromethane:methanol, 100:1). The product dihydroquinolone **10** (71 mg, 90%, 61:38 e.r., >20:1 dr) was obtained as a yellow foam.

**Racemic:** Scandium(III) triflate (6 mg, 0.012 mmol) was added to a stirred RT solution of aniline **1** (25 mg, 0.12 mmol) and 2-chlorobenzaldehyde (27  $\mu$ L, 0.24 mmol) in dichloromethane (1 mL). After 1 h the solvent was removed *in vacuo* and the crude product purified by flash column chromatography (silica gel, petrol:ethyl acetate, 1:1) to afford **10** (34 mg, 86%) as a yellow foam.

$\delta_{\text{H}}$  (400 MHz,  $\text{CDCl}_3$ ): 7.85 (1H, dd,  $J$  8.0, 1.0, H5), 7.48–7.43 (1H, m, H15), 7.43–7.38 (1H, m, H16), 7.34 (1H, ddd,  $J$  8.3, 7.1, 1.4, H3), 7.29–7.23 (2H, m, H14 & H17), 6.77 (1H, t,  $J$  7.6, H4), 6.69 (1H, d,  $J$  8.3, H2), 5.63 (1H, d,  $J$  11.6, H12), 4.58 (1H, s, H11), 4.44 (1H, d,  $J$  11.6, H8), 3.07 (3H, s, H10), 2.89 (3H, s, H10').

$\delta_{\text{C}}$  (101 MHz,  $\text{CDCl}_3$ ):\* 189.4 (C7), 167.4 (C9), 150.9 (C1), 136.6 (C13), 135.8 (C3), 133.9 (C18), 130.6 (C16), 129.6 (C17), 128.7 (C15), 128.0 (C5), 127.2 (C14), 118.3 (C4), 115.8 (C2), 56.5 (C12), 54.5 (C8), 37.7 (C10), 35.7 (C10').

HRMS (ESI+): found 351.0874;  $\text{C}_{18}\text{H}_{17}^{35}\text{ClN}_2\text{NaO}_2$ ,  $[\text{M}(^{35}\text{Cl})+\text{Na}]^+$  requires 351.0871.

$\nu_{\text{max}}$  (neat): 3328 (NH), 2924 (CH), 2854 (CH), 1639 (ketone), 1608 (amide), 1479, 1324, 1057, 757  $\text{cm}^{-1}$ .

MP: 173-175 °C (dichloromethane).

HPLC (Chiralpak OD-H, 30% IPA, 70% hexane, 1.0  $\text{mL}\cdot\text{min}^{-1}$ ,  $\lambda = 245$ ):  $t_{\text{R}}$  (major) = 7.1,  $t_{\text{R}}$  (minor) = 11.0.

$[\alpha]_{\text{D}}^{20.0} +69.2$  ( $c = 1$ ,  $\text{CHCl}_3$ ).

### 2-(3-Chlorophenyl)-*N,N*-dimethyl-4-oxo-1,2,3,4-tetrahydroquinoline-3-carboxamide

(11)

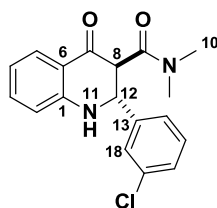

**Asymmetric:** prepared according to *general procedure 1*. Aniline **1** (50 mg, 0.24 mmol), 3-chlorobenzaldehyde (54  $\mu\text{L}$ , 0.48 mmol). *Work-up procedure A* was employed: chromatography (silica gel, 0.75% methanol in dichloromethane). The product dihydroquinolone **11** (66 mg, 83%, 78:22 e.r., >20:1 dr) was obtained as a yellow foam.

---

\* The  $^{13}\text{C}$  peak corresponding to C6 was not observed.



***Racemic:*** Scandium(III) triflate (6 mg, 0.012 mmol) was added to a stirred RT solution of aniline **1** (25 mg, 0.12 mmol) and 3-chlorobenzaldehyde (27  $\mu$ L, 0.24 mmol) in dichloromethane (1 mL). After 1 h the solvent was removed *in vacuo* and the crude product purified by flash column chromatography (silica gel, petrol:ethyl acetate, 1:1) to afford **11** (28 mg, 71%) as a yellow crystalline solid.

$\delta_{\text{H}}$  (400 MHz,  $\text{CDCl}_3$ ): 7.87 (1H, dd,  $J$  8.0, 1.1, H5), 7.59 (1H, s, H18), 7.42 (1H, dt,  $J$  6.7, 1.7, H16), 7.36 (1H, ddd,  $J$  8.3, 7.0, 1.4, H3), 7.33–7.28 (2H, m, H14 & H15), 6.80 (1H, t,  $J$  7.5, H4), 6.72 (1H, d,  $J$  8.4, H2), 5.23 (1H, d,  $J$  13.0, H12), 4.51 (1H, s, H11), 4.10 (1H, d,  $J$  12.9, H8), 2.87 (6H, s, H10).

$\delta_{\text{C}}$  (101 MHz,  $\text{CDCl}_3$ ): 189.2 (C7), 167.6 (C9), 150.9 (C1), 141.9 (C13), 135.8 (C3), 134.5 (C17), 130.0 (C14/C15), 128.8 (C14/C15), 128.0 (C5), 127.5 (C18), 126.3 (C16), 118.7 (C4), 118.6 (C6), 115.9 (C2), 60.1 (C12), 57.4 (C8), 37.6 (C10), 35.6 (C10').

HRMS (ESI+): found 351.0871;  $\text{C}_{18}\text{H}_{17}^{35}\text{ClN}_2\text{NaO}_2$ ,  $[\text{M}(^{35}\text{Cl})+\text{Na}]^+$  requires 351.0871.

$\nu_{\text{max}}$  (neat): 3282 (NH), 2924 (CH), 2854 (CH), 1632 (ketone), 1608 (amide), 1327, 1162, 747  $\text{cm}^{-1}$ .

MP: 232–235  $^{\circ}\text{C}$  (dichloromethane).

HPLC (Chiralpak OD-H, 30% IPA, 70% hexane, 1.0  $\text{mL}\cdot\text{min}^{-1}$ ,  $\lambda = 245$ ):  $t_{\text{R}}$  (major) = 7.9,  $t_{\text{R}}$  (minor) = 14.2.

$[\alpha]_{\text{D}}^{20.0} +80.0$  ( $c = 1$ ,  $\text{CHCl}_3$ ).

2-(4-Chlorophenyl)-*N,N*-dimethyl-4-oxo-1,2,3,4-tetrahydroquinoline-3-carboxamide

(12)

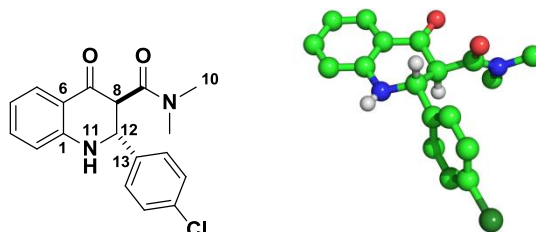

**Asymmetric:** prepared according to *general procedure 1*. Aniline **1** (50 mg, 0.24 mmol), 4-chlorobenzaldehyde (72 mg, 0.48 mmol). *Work-up procedure A* was employed: chromatography (silica gel, 0.75% methanol in dichloromethane). The product dihydroquinolone **12** (71 mg, 90%, 68:32 e.r., >20:1 dr) was obtained as a yellow foam.

**Racemic:** Scandium(III) triflate (6 mg, 0.012 mmol) was added to a stirred RT solution of aniline **1** (25 mg, 0.12 mmol) and 4-chlorobenzaldehyde (27  $\mu$ L, 0.24 mmol) in dichloromethane (1 mL). After 1 h the solvent was removed *in vacuo* and the crude product purified by flash column chromatography (silica gel, petrol:ethyl acetate, 1:1) to afford **12** (31 mg, 79%) as a yellow crystalline solid.

$\delta_{\text{H}}$  (400 MHz,  $\text{CDCl}_3$ ): 7.86 (1H, d,  $J$  8.0, H5), 7.49 (2H, d,  $J$  7.8, H14), 7.35 (1H, t,  $J$  7.7, H3), 7.32 (2H, d,  $J$  7.8, H15), 6.80 (1H, t,  $J$  7.6, H4), 6.72 (1H, d,  $J$  8.2, H2), 5.20 (1H, d,  $J$  12.9, H12), 4.53 (1H, s, H11), 4.07 (1H, d,  $J$  13.1, H8), 2.86 (6H, s, H10).

$\delta_{\text{C}}$  (101 MHz,  $\text{CDCl}_3$ ): 189.3 (C7), 167.6 (C9), 151.1 (C1), 138.4 (C13), 135.8 (C3), 134.3 (C16), 129.1 (C14), 128.8 (C15), 128.0 (C5), 118.7 (C4), 118.6 (C6), 115.9 (C2), 60.0 (C12), 57.6 (C8), 37.5 (C10), 35.6 (C10').

HRMS (ESI<sup>+</sup>): found 351.0866;  $\text{C}_{18}\text{H}_{17}^{35}\text{ClN}_2\text{NaO}_2$ ,  $[\text{M}(^{35}\text{Cl})+\text{Na}]^+$  requires 351.0871.

$\nu_{\text{max}}$  (neat): 3328 (NH), 2924 (CH), 2855 (CH), 1662 (ketone), 1628, 1607 (amide), 1507, 1484, 1134, 1107, 765  $\text{cm}^{-1}$ .

MP: 198–200 °C (dichloromethane).

HPLC (Chiralpak OD-H, 30% IPA, 70% hexane, 1.0  $\text{mL}\cdot\text{min}^{-1}$ ,  $\lambda = 245$ ):  $t_{\text{R}}$  (major) = 7.5,  $t_{\text{R}}$  (minor) = 17.8.

$[\alpha]_{\text{D}}^{20.0} +51.4$  ( $c = 0.5$ ,  $\text{CHCl}_3$ ).

***N,N*-Dimethyl-2-(2-nitrophenyl)-4-oxo-1,2,3,4-tetrahydroquinoline-3-carboxamide (13)**

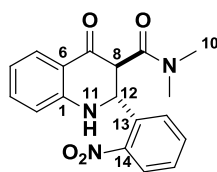

**Asymmetric:** prepared according to *general procedure 1*. Aniline **1** (50 mg, 0.24 mmol), 2-nitrobenzaldehyde (72 mg, 0.48 mmol). *Work-up procedure B* was employed: chromatography (silica gel, 0.5% methanol in dichloromethane). The product dihydroquinolone **13** (14 mg, 17%, 71:29 e.r., >20:1 dr) was obtained as a yellow foam.

**Racemic:** prepared according to *general procedure 6*.

$\delta_{\text{H}}$  (400 MHz,  $\text{CDCl}_3$ ): 7.85 (1H, d,  $J$  8.0, H5), 7.80 (1H, d,  $J$  8.1, H15), 7.71 (1H, d,  $J$  7.8, H18), 7.59 (1H, t,  $J$  7.6, H17), 7.47 (1H, t,  $J$  7.7, H16), 7.38 (1H, t,  $J$  7.8, H3), 6.82 (1H, t,  $J$  7.6, H4), 6.75 (1H, d,  $J$  8.2, H2), 5.66 (1H, d,  $J$  11.6, H12), 4.80 (1H, d,  $J$  11.4, H8), 3.05 (3H, s, H10), 2.88 (3H, s, H10').

$\delta_{\text{C}}$  (101 MHz,  $\text{CDCl}_3$ ): 188.6 (C7), 167.0 (C9), 150.8 & 150.4 (C1 & C14), 135.9 (C3), 133.8 (C13), 132.7 (C17), 129.2 (C18), 129.0 (C16), 127.9 (C5), 124.6 (C15), 119.0 (C4), 118.5 (C6), 116.1 (C2), 55.6 (C8), 55.1 (C12), 37.6 (C10), 35.7 (C10').

HRMS (ESI+): found 362.1120;  $\text{C}_{18}\text{H}_{17}\text{N}_3\text{NaO}_4$ ,  $[\text{M}+\text{Na}]^+$  requires 362.1111.

$\nu_{\text{max}}$  (neat): 3361 (NH), 2930 (CH), 1640 (ketone), 1611 (amide), 1528 ( $\text{NO}_2$ ), 1355 ( $\text{NO}_2$ ), 1155, 762  $\text{cm}^{-1}$ .

MP: 202–204 °C (dichloromethane).

$[\alpha]_{\text{D}}^{20.0} +61.8$  ( $c = 1$ ,  $\text{CHCl}_3$ ).

HPLC (Chiralpak ODH, 30% IPA, 70% hexane, 1.0  $\text{mL}\cdot\text{min}^{-1}$ ,  $\lambda = 246$ ):  $t_{\text{R}}(\text{major}) = 9.5$ ,  $t_{\text{R}}(\text{minor}) = 13.7$ .

***N,N*-Dimethyl-2-(3-nitrophenyl)-4-oxo-1,2,3,4-tetrahydroquinoline-3-carboxamide (14)**

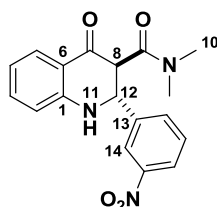

**Asymmetric:** prepared according to *general procedure 1*. Aniline **1** (50 mg, 0.24 mmol), 3-nitrobenzaldehyde (72 mg, 0.48 mmol). *Work-up procedure A* was employed: chromatography (silica gel, 0.5% methanol in dichloromethane). The product dihydroquinolone **14** (53 mg, 64%, 71:29 e.r., >20:1 dr) was obtained as a yellow foam.

**Racemic:** prepared according to *general procedure 2*.

$\delta_{\text{H}}$  (400 MHz,  $d_6$ -DMSO): 8.43 (1H, t,  $J$  1.9, H14), 8.20 (1H, ddd,  $J$  8.3, 2.3, 0.9, H16), 8.00 (1H, d,  $J$  7.7, H18), 7.71–7.63 (2H, m, H5 & H17), 7.37 (1H, ddd,  $J$  8.4, 7.0, 1.5, H3), 7.22 (1H, br s, H11), 6.87 (1H, d,  $J$  8.3, H2), 6.70 (1H, t,  $J$  7.6, H4), 5.13 (1H, d,  $J$  13.2, H12), 4.70 (1H, d,  $J$  13.3, H8), 2.84 (3H, s, H10), 2.67 (3H, s, H10').

$\delta_{\text{C}}$  (101 MHz,  $d_6$ -DMSO): 190.2 (C7), 168.4 (C9), 152.7 (C1), 148.4 (C15), 143.3 (C13), 136.3 (C3), 136.0 (C18), 130.7 (C17), 127.6 (C5), 123.9 (C16), 123.9 (C14), 118.2 (C6), 117.8 (C4), 117.1 (C2), 59.8 (C12), 56.2 (C8), 37.8 (C10), 35.7 (C10').

HRMS (ESI+): found 362.1107;  $\text{C}_{18}\text{H}_{17}\text{N}_3\text{NaO}_4$ ,  $[\text{M}+\text{Na}]^+$  requires 362.1111.

$\nu_{\text{max}}$  (neat): 3262 (NH), 2922 (CH), 2853 (CH), 1664 (ketone), 1625 (amide), 1531 ( $\text{NO}_2$ ), 1347 ( $\text{NO}_2$ ), 766, 731, 705  $\text{cm}^{-1}$ .

MP: 231–234 °C (dichloromethane).

$[\alpha]_{\text{D}}^{20.0} +65.5$  ( $c = 1$ ,  $\text{CHCl}_3$ ).

HPLC (Chiralpak ODH, 30% IPA, 70% hexane, 1.0 mL.min<sup>-1</sup>,  $\lambda = 245$ ):  $t_{\text{R}}$ (major) = 12.9,  $t_{\text{R}}$ (minor) = 21.2.

***N,N*-Dimethyl-2-(4-nitrophenyl)-4-oxo-1,2,3,4-tetrahydroquinoline-3-carboxamide (15)**

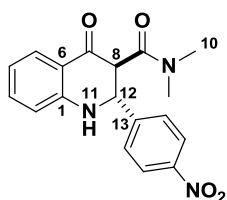

**Asymmetric:** prepared according to *general procedure 1*. Aniline **1** (50 mg, 0.24 mmol), 4-nitrobenzaldehyde (72 mg, 0.48 mmol). *Work-up procedure A* was employed: chromatography

(silica gel, 0.5% methanol in dichloromethane). The product dihydroquinolone **15** (60 mg, 73%, 62:38 e.r., >20:1 dr) was obtained as a yellow foam.

***Racemic:*** prepared according to ***general procedure 2***.

$\delta_{\text{H}}$  (400 MHz,  $\text{CDCl}_3$ ): 8.21 (2H, d,  $J$  8.8, H15), 7.89 (1H, dd,  $J$  8.0, 1.4, H5), 7.78 (2H, d,  $J$  8.7, H14), 7.40 (1H, ddd,  $J$  8.2, 7.2, 1.5, H3), 6.85 (1H, t,  $J$  7.2, H4), 6.75 (1H, d,  $J$  8.2, H2), 5.39 (1H, d,  $J$  12.9, H12), 4.51 (1H, br s, H11), 4.11 (1H, d,  $J$  12.9, H8), 2.89 (3H, s, H10), 2.87 (3H, s, H10').

$\delta_{\text{C}}$  (101 MHz,  $\text{CDCl}_3$ ): 188.5 (C7), 167.1 (C9), 150.7 (C1), 148.0 (C16), 147.1 (C13), 136.0 (C3), 128.9 (C14), 128.0 (C5), 123.9 (C15), 119.2 (C4), 118.7 (C6), 116.0 (C2), 60.0 (C12), 57.5 (C8), 37.6 (C10), 35.6 (C10').

HRMS (ESI+): found 362.1115;  $\text{C}_{18}\text{H}_{17}\text{N}_3\text{NaO}_4$ ,  $[\text{M}+\text{Na}]^+$  requires 362.1111.

$\nu_{\text{max}}$  (neat): 3245 (NH), 3058 (CH), 2923 (CH), 2854 (CH), 1665 (ketone), 1630 (amide), 1513 ( $\text{NO}_2$ ), 1480, 1344 ( $\text{NO}_2$ ), 858, 745, 662  $\text{cm}^{-1}$ .

MP: 248–253 °C (dichloromethane).

$[\alpha]_{\text{D}}^{20.0} +30.3$  ( $c = 1$ ,  $\text{CHCl}_3$ ).

HPLC (Chiralpak ODH, 30% IPA, 70% hexane, 1.0  $\text{mL}\cdot\text{min}^{-1}$ ,  $\lambda = 245$ ):  $t_{\text{R}}(\text{major}) = 12.3$ ,  $t_{\text{R}}(\text{minor}) = 31.6$ .

**2-(2-Methoxyphenyl)-*N,N*-dimethyl-4-oxo-1,2,3,4-tetrahydroquinoline-3-carboxamide**

**(16)**

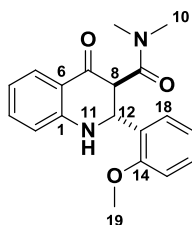

**Asymmetric:** prepared according to *general procedure 1*. Aniline **1** (50 mg, 0.24 mmol), 2-methoxybenzaldehyde (65 mg, 0.48 mmol). *Work-up procedure B* was employed: chromatography (silica gel, 0.5% methanol in dichloromethane). The product dihydroquinolone **16** (56 mg, 72%, 56:44 e.r., >20:1 dr) was obtained as a yellow foam.

**Racemic:** prepared according to *general procedure 2*.

$\delta_{\text{H}}$  (400 MHz,  $\text{CDCl}_3$ ) 7.78 (1 H, dd,  $J$  8.0, 1.4, H5), 7.28 – 7.18 (3 H, m, H3, H16 & H18), 6.91 – 6.83 (2 H, m, H15 & H17), 6.67 (1 H, t,  $J$  7.5, H4), 6.59 (1 H, d,  $J$  8.2, H2), 5.42 (1 H, d,  $J$  11.5, H12), 4.50 (1 H, s, H11), 4.43 (1 H, d,  $J$  11.5, H8), 3.79 (3 H, s, H19), 3.01 (3 H, s, H10), 2.83 (3 H, s, H10').

$\delta_{\text{C}}$  (101 MHz,  $\text{CDCl}_3$ ) 190.3 (C7), 168.3 (C9), 157.5 (C14), 151.3 (C1), 135.5 (C3), 129.6 (C16/C18), 128.3 (C16/C18), 127.9 (C5), 127.1 (C12), 120.9 (C17), 118.6 (C6), 117.9 (C4), 115.8 (C2), 111.5 (C15), 55.6 (C19), 54.8 (C12), 53.9 (C8), 37.6 (C10), 35.6 (C10).

$\nu_{\text{max}}$  (neat): 3312, 2933, 1634, 1610, 1494, 1483, 1248, 756, 731  $\text{cm}^{-1}$ .

HRMS (ESI): found 347.1354;  $\text{C}_{19}\text{H}_{20}\text{N}_2\text{NaO}_3$   $[\text{M}+\text{Na}]^+$  requires 347.1366.

MP: 214–216 °C (dichloromethane).

HPLC (Chiralpak OD-H, 50% IPA, 50% hexane, 1.0 mL.min<sup>-1</sup>,  $\lambda$  = 245):  $t_R$  (major) = 5.5,  $t_R$  (minor) = 9.5.

$[\alpha]_D^{20.0} + 38.4$  ( $c$  = 1, CHCl<sub>3</sub>).

**2-(4-Methoxyphenyl)-*N,N*-dimethyl-4-oxo-1,2,3,4-tetrahydroquinoline-3-carboxamide**

(17)

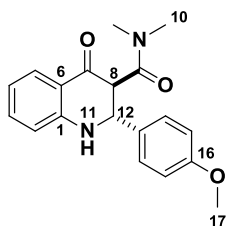

**Asymmetric:** prepared according to *general procedure 1*. Aniline **1** (50 mg, 0.24 mmol), 4-methoxybenzaldehyde (65 mg, 0.48 mmol). *Work-up procedure B* was employed: chromatography (silica gel, 0.5% methanol in dichloromethane). The product dihydroquinolone **17** (66 mg, 85%, 59:41 e.r., >20:1 dr) was obtained as a yellow foam.

**Racemic:** prepared according to *general procedure 2*.

$\delta_H$  (400 MHz, CDCl<sub>3</sub>) 7.87 (1 H, dd,  $J$  8.0, 1.3, H5), 7.49 – 7.43 (2 H, m, H14), 7.35 (1 H, ddd,  $J$  8.5, 7.1, 1.6, H3), 6.92 – 6.84 (2 H, m, H15), 6.78 (1 H, t,  $J$  7.5, H4), 6.69 (1 H, d,  $J$  8.2, H2), 5.18 (1 H, d,  $J$  13.0, H12), 4.48 (1 H, br s, H11), 4.11 (1 H, d,  $J$  13.0, H8), 3.82 (3 H, s, H17), 2.85 (6 H, s, H10).

$\delta_C$  (101 MHz, CDCl<sub>3</sub>) 189.9 (C7), 168.1 (C9), 159.6 (C16), 151.3 (C1), 135.7 (C3), 131.8 (C13), 128.8 (C14), 128.0 (C5), 118.6 (C6), 118.3 (C4), 115.8 (C2), 114.0 (C15), 60.1 (C12), 57.7 (C8), 55.3 (C17), 37.6 (C10), 35.6 (C10').

$\nu_{\max}$  (neat): 2206, 2934, 1634, 1610, 1509, 1248, 762, 735 cm<sup>-1</sup>.



HRMS (ESI): found 347.1356;  $C_{19}H_{20}N_2NaO_3$   $[M+Na]^+$  requires 347.1366.

MP: 160–164 °C (dichloromethane).

HPLC (Chiralpak OD-H, 50% IPA, 50% hexane, 1.0 mL.min<sup>-1</sup>,  $\lambda$  = 245):  $t_R$  (major) = 6.1,  $t_R$  (minor) = 11.1.

$[\alpha]_D^{20.0} +19.0$  ( $c$  = 1, CHCl<sub>3</sub>).

**2-(3-Methoxyphenyl)-*N,N*-dimethyl-4-oxo-1,2,3,4-tetrahydroquinoline-3-carboxamide**

**(18)**

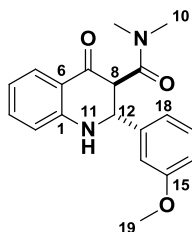

**Asymmetric:** prepared according to *general procedure 1*. Aniline **1** (50 mg, 0.24 mmol), 3-methoxybenzaldehyde (65 mg, 0.48 mmol). *Work-up procedure B* was employed: chromatography (silica gel, 0.5% methanol in dichloromethane). The product dihydroquinolone **18** (58 mg, 75%, 63:37 e.r., >20:1 dr) was obtained as a yellow foam.

**Racemic:** prepared according to *general procedure 2*.

$\delta_H$  (400 MHz, CDCl<sub>3</sub>) 7.89 (1 H, dd,  $J$  8.0, 1.2, H5), 7.37 (1 H, ddd,  $J$  8.5, 7.2, 1.6, H3), 7.32 – 7.26 (1 H, m, H17), 7.16 – 7.08 (2 H, m, H, H14 & H18), 6.89 (1 H, dd,  $J$  7.9, 2.2, H16), 6.80 (1 H, t,  $J$  7.5, H4), 6.72 (1 H, d,  $J$  8.2, H2), 5.23 (1 H, d,  $J$  13.0, H12), 4.54 (1 H, s, H11), 4.16 (1 H, d,  $J$  13.0, H8), 3.83 (3 H, s, H19), 2.88 (3 H, s, H10), 2.86 (3 H, s, H10').

$\delta_c$  (101 MHz,  $\text{CDCl}_3$ ) 189.7 (C5), 168.0 (C9), 159.8 (C15), 151.1 (C1), 141.4 (C13), 135.7 (C3), 129.8 (C17), 128.0 (C5), 120.0 (C18), 118.5 (C4), 118.5 (C4), 115.8 (C2), 114.1 (C16), 113.0 (C14), 60.6 (C12), 57.5 (C8), 55.3 (C19), 37.6 (C10), 35.6 (C10').

$$\nu_{\max}(\text{neat}): 3305, 2936, 1633, 1609, 1484, 1260, 1156, 1041, 760, 729 \text{ cm}^{-1}.$$

HRMS (ESI): found 347.1355;  $C_{19}H_{20}N_2NaO_3$   $[M+Na]^+$  requires 347.1366.

HPLC (Chiralpak OD-H, 50% IPA, 50% hexane, 1.0 mL.min<sup>-1</sup>,  $\lambda$  = 245):  $t_R$  (major) = 6.5,  $t_R$  (minor) = 12.1.

$$[\alpha]_{\text{D}}^{20.0} + 31.1 \text{ } (c = 1, \text{CHCl}_3).$$

**2-Ethyl-*N,N*-dimethyl-4-oxo-1,2,3,4-tetrahydroquinoline-3-carboxamide (19)**

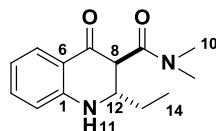

**Asymmetric:** prepared according to *general procedure 1*. Aniline **1** (50 mg, 0.24 mmol), *n*-butyraldehyde (34  $\mu$ L, 0.48 mmol). *Work-up procedure A* was employed: chromatography (silica gel, 1% methanol in dichloromethane). The product dihydroquinolone **19** (60 mg, 100%, 82:18 e.r., >20:1 dr) was obtained as a yellow foam.

**Racemic:** prepared according to *general procedure 2*..

$\delta_{\text{H}}$  (400 MHz,  $\text{CDCl}_3$ ) 7.85 – 7.73 (1 H, dd,  $J$  7.9, 1.4, H5), 7.33 – 7.27 (1 H, ddd,  $J$  8.3, 7.1, 1.4, H3), 6.75 – 6.67 (2 H, m, H2 & H4), 4.44 (1 H, s, H11), 4.09 (1 H, ddd,  $J$  12.6, 7.3, 3.1, H12), 3.73 (1 H, d,  $J$  12.7, H8), 3.07 (3 H, s, H10), 3.06 (3 H, s, H10'), 1.75 (1 H, dqd,  $J$  15.2, 7.6, 3.1, H13), 1.62 (1 H, dp,  $J$  14.6, 7.4, H13'), 1.03 (3 H, t,  $J$  7.5, H14).

$\delta_{\text{H}}$  (400 MHz,  $\text{CDCl}_3$ ): 7.80 (1H, dd,  $J$  7.9, 1.4, H5), 7.30 (1H, ddd,  $J$  8.3, 7.1, 1.4, H3), 6.74–6.68 (2H, m, H2 & H4), 4.44 (1H, br s, H11), 4.09 (1H, ddd,  $J$  12.6, 7.3, 3.1, H12), 3.73 (1H, d,  $J$  12.6, H8), 3.07 (3H, s, H10), 3.06 (3H, s, H10'), 1.75 (1H, dqd,  $J$  14.7, 7.3, 3.2, H13), 1.62 (1H, ddq,  $J$  14.4, 7.2, 7.2, H13'), 1.03 (3H, t,  $J$  7.5, H14).  $\delta_{\text{C}}$  (101 MHz,  $\text{CDCl}_3$ ):

$\nu_{\text{max}}$  (neat): 3288, 2970, 2875, 1660, 1625, 1610, 1517, 1483, 1155, 1046, 767  $\text{cm}^{-1}$ .

MP: 124–128 °C (dichloromethane).

HRMS (ESI+): found 269.1262;  $\text{C}_{14}\text{H}_{18}\text{N}_2\text{NaO}_2$ ,  $[\text{M}+\text{Na}]^+$  requires 269.1260.

HPLC (Chiralpak OD-H, 30% IPA, 70% hexane, 1.0  $\text{mL}\cdot\text{min}^{-1}$ ,  $\lambda = 245$ ):  $t_{\text{R}}$  (major) = 5.7,  $t_{\text{R}}$  (minor) = 9.8.

$[\alpha]_{\text{D}}^{20.0} +278.8$  ( $c = 1$ ,  $\text{CHCl}_3$ ).

#### ***N,N*-Dimethyl-4-oxo-2-propyl-1,2,3,4-tetrahydroquinoline-3-carboxamide (20)**

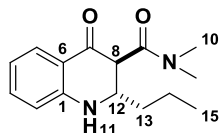

***Asymmetric***: prepared according to ***general procedure 1***. Aniline **1** (50 mg, 0.24 mmol), *n*-butyraldehyde (43  $\mu\text{L}$ , 0.48 mmol). *Work-up procedure A* was employed: chromatography (silica gel, 1% methanol in dichloromethane). The product dihydroquinolone **20** (64 mg, 100%, 88:12 e.r., >20:1 dr) was obtained as a yellow foam.

***Racemic***: prepared according to ***general procedure 2***.

$\delta_{\text{H}}$  (400 MHz,  $\text{CDCl}_3$ ) 7.82 (1 H, dd,  $J$  8.0, 1.2, H5), 7.35 – 7.28 (1 H, m, H3), 6.73 (1 H, t,  $J$  7.5, H4), 6.69 (1 H, d,  $J$  8.3, H2), 4.39 (1 H, s, H11), 4.13 (1 H, ddd,  $J$  12.5, 7.7, 3.9, H12), 3.72 (1 H,

d,  $J$  12.6, H8), 3.08(4) (3 H, s, H10), 3.07(6) (3 H, s, H10'), 1.70 – 1.54 (2 H, m, H13), 1.54 – 1.42 (2 H, m, H14), 0.99 (3 H, t,  $J$  7.2, H15).

$\delta_c$  (101 MHz,  $CDCl_3$ ) 190.2 (C7), 168.6 (C9), 151.1 (C1), 135.5 (C3), 127.9 (C5), 118.6 (C6), 118.0 (C4), 115.9 (C2), 55.4 (C8), 55.1 (C12), 37.7 (C10), 35.7 (C10' & C11), 18.4 (C13), 14.0 (C14).

$\nu_{max}$  (neat): 3284, 2959, 2873, 1664, 1611, 1519, 1484, 1198, 1154, 772  $cm^{-1}$ .

HRMS (ESI+): found 283.1416;  $C_{15}H_{20}N_2NaO_2$ ,  $[M+Na]^+$  requires 283.1417.

MP: 106–108 °C (dichloromethane).

HPLC (Chiralpak OD-H, 30% IPA, 70% hexane, 1.0 mL.min<sup>-1</sup>,  $\lambda$  = 237):  $t_R$  (major) = 5.4,  $t_R$  (minor) = 10.0.

$[\alpha]_D^{20.0} +280.3$  ( $c$  = 1,  $CHCl_3$ ).

### ***N,N*-Dimethyl-4-oxo-2-phenethyl-1,2,3,4-tetrahydroquinoline-3-carboxamide (21)**

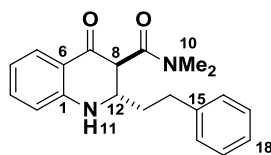

***Asymmetric:*** prepared according to ***general procedure 1***. Aniline **1** (50 mg, 0.24 mmol), 3-phenylpropionaldehyde (64  $\mu$ L, 0.48 mmol). *Work-up procedure A* was employed: chromatography (silica gel, 1% methanol in dichloromethane). The product dihydroquinolone **21** (72 mg, 92%, 79:21 e.r., >20:1 dr) was obtained as a yellow foam.

***Racemic:*** prepared according to ***general procedure 2***.

$\delta_{\text{H}}$  (400 MHz,  $\text{CDCl}_3$ ): 7.81 (1H, dd,  $J$  8.0, 1.4, H5), 7.28–7.37 (3H, m, H3 & H17), 7.27–7.22 (3H, m, H16 & H18), 6.73 (1H, t,  $J$  7.5, H4), 6.55 (1H, d,  $J$  8.3, H2), 4.32–4.19 (2H, m, H11 & H12, *H12 appears as a ddd,  $J$  12.4, 7.8, 3.0*), 3.74 (1H, d,  $J$  12.5, H8), 3.06 (3H, s, H10), 3.03 (3H, s, H10'), 2.85 (1H, ddd,  $J$  14.0, 8.8, 5.5, H14), 2.79 (1H, ddd,  $J$  13.8, 9.0, 7.2, H14'), 2.09–1.90 (2H, m, H13 & H13').

$\delta_{\text{C}}$  (101 MHz,  $\text{CDCl}_3$ ): 190.0 (C7), 168.4 (C9), 151.0 (C1), 141.0 (C15), 135.5 (C3), 128.7 (C16), 128.4 (C17), 127.8 (C5), 126.4 (C18), 118.6 (C6), 118.1 (C4), 115.7 (C2), 55.6 (C12), 55.4 (C8), 37.6 (C10), 35.7 (C10'), 35.0 (C13), 32.1 (C14).

$\nu_{\text{max}}$  (neat): 3325 (NH), 3026 (CH), 2929 (CH), 1629, 1609 (amide), 1483, 1343, 1153, 1114, 754, 699  $\text{cm}^{-1}$ .

HRMS (ESI+): found 345.1573;  $\text{C}_{20}\text{H}_{22}\text{N}_2\text{NaO}_2$ ,  $[\text{M}+\text{Na}]^+$  requires 345.1573.

MP: 54–56 °C (dichloromethane).

HPLC (Chiralpak OD-H, 30% IPA, 70% hexane, 1.0  $\text{mL}\cdot\text{min}^{-1}$ ,  $\lambda = 245$ ):  $t_{\text{R}}$  (major) = 27.4,  $t_{\text{R}}$  (minor) = 18.0.

$[\alpha]_{\text{D}}^{20.0} +187.7$  ( $c = 1$ ,  $\text{CHCl}_3$ ).

## 2-(But-3-en-1-yl)-*N,N*-dimethyl-4-oxo-1,2,3,4-tetrahydroquinoline-3-carboxamide (22)

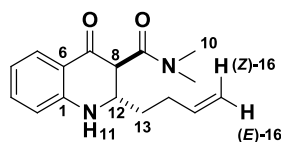

**Asymmetric:** prepared according to *general procedure 1*. Aniline **1** (50 mg, 0.24 mmol), 4-pentenal (57  $\mu\text{L}$ , 0.48 mmol). *Work-up procedure A* was employed: chromatography (silica gel,

0.5% methanol in dichloromethane). The product dihydroquinolone **22** (65 mg, 98%, 68:32 e.r., >20:1 dr) was obtained as a yellow foam.

**Racemic:** prepared according to *general procedure 2*.

$\delta_{\text{H}}$  (400 MHz,  $\text{CDCl}_3$ ): 7.82 (1H, d,  $J$  8.0, H5), 7.3 (1H, ddd,  $J$  8.9, 6.6, 1.2, H3), 6.73 (1H, ddt,  $J$  8.9, 6.6, 1.2, H3), 6.73 (1H, ddt,  $J$  8.0, 7.2, 0.7, H4), 6.78 (1H, d,  $J$  8.3, H2), 5.86 (1H, ddt,  $J$  17.0, 10.3, 6.7, H15), 5.12 (1H, d,  $J$  17.1, (*Z*)-H16), 5.04 (1H, d,  $J$  10.1, (*E*)-H16), 4.50 (1H, br s, H11), 4.17 (1H, ddd,  $J$  12.1, 8.5, 3.3, H12), 3.73 (1H, d,  $J$  12.5, H8), 3.08 (3H, s, H10), 3.07 (3H, s, H10'), 2.31–2.19 (2H, m, H14), 1.86–1.77 (1H, m, H13), 1.76–1.65 (1H, m, H13').

$\delta_{\text{C}}$  (101 MHz,  $\text{CDCl}_3$ ): 190.0 (C7), 168.5 (C9), 151.1 (C1), 137.6 (C15), 135.5 (C3), 127.9 (C5), 118.6 (C6), 118.1 (C4), 115.8 (C2/C16), 115.7 (C2/C16), 55.3 (C8), 55.2 (C12), 37.7 (C10), 35.7 (C10'), 32.4 (C13), 29.7 (C14).

HRMS (ESI+): found 295.1412;  $\text{C}_{16}\text{H}_{20}\text{N}_2\text{NaO}_2$ ,  $[\text{M}+\text{Na}]^+$  requires 295.1417.

MP: 146–150 °C (dichloromethane).

$\nu_{\text{max}}$  (neat): 3325 (NH), 3075 (CH), 2927 (CH), 1631, 1610 (amide), 1483, 1346, 1154, 912, 759  $\text{cm}^{-1}$ .

$[\alpha]_{\text{D}}^{20.0} +143.7$  ( $c = 1$ ,  $\text{CHCl}_3$ ).

HPLC (Chiralpak ODH, 30% IPA, 70% hexane, 1.0 mL.min<sup>-1</sup>,  $\lambda = 245$ ):  $t_{\text{R}}(\text{major}) = 5.5$ ,  $t_{\text{R}}(\text{minor}) = 9.6$ .

**2-iso-Propyl-*N,N*-dimethyl-4-oxo-1,2,3,4-tetrahydroquinoline-3-carboxamide (23)**

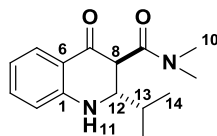

**Asymmetric:** prepared according to *general procedure 1*. Aniline **1** (50 mg, 0.24 mmol), *n*-butyraldehyde (44  $\mu$ L, 0.48 mmol). *Work-up procedure A* was employed: chromatography (silica gel, 0.5% methanol in dichloromethane). The product dihydroquinolone **23** (64 mg, 100%, 59:41 e.r., >20:1 dr) was obtained as a yellow foam.

**Racemic:** prepared according to *general procedure 2*.

$\delta_{\text{H}}$  (400 MHz,  $\text{CDCl}_3$ ): 7.81 (1H, d,  $J$  7.9, H5), 7.31 (1H, t,  $J$  8.1, H3), 6.74–6.68 (2H, m, H2 & H4), 4.26 (1H, br s, H11), 4.07 (1H, dd,  $J$  12.5, 2.8, H12), 3.84 (1H, d,  $J$  12.4, H8), 3.10 (3H, s, H10), 3.07 (3H, s, H10'), 2.04 (1H, septet of doublets,  $J$  6.9, 2.8, H13), 1.10 (3H, d,  $J$  7.1, H14), 0.95 (3H, d,  $J$  6.9, H14').

$\delta_{\text{C}}$  (101 MHz,  $\text{CDCl}_3$ ): 190.5 (C7), 168.6 (C9), 151.4 (C1), 135.5 (C3), 127.8 (C5), 118.4 (C6), 117.8 (C4), 115.9 (C2), 59.7 (C12), 53.2 (C8), 37.6 (C10), 35.7 (C10'), 28.9 (C13), 19.7 (C14), 15.7 (C14').

$\nu_{\text{max}}$  (neat): 3319 (NH), 2959 (CH), 2934 (CH), 1663 (ketone), 1631 (amide), 1514, 1484, 1302, 1146, 1094, 769, 755  $\text{cm}^{-1}$ .

HRMS (ESI<sup>+</sup>): found 283.1418;  $\text{C}_{15}\text{H}_{20}\text{N}_2\text{NaO}_2$ ,  $[\text{M}+\text{Na}]^+$  requires 283.1417.

MP: 130–136  $^{\circ}\text{C}$  (dichloromethane).

HPLC (Chiralpak OD-H, 30% IPA, 70% hexane, 1.0  $\text{mL}\cdot\text{min}^{-1}$ ,  $\lambda = 245$ ):  $t_{\text{R}}$  (major) = 5.5,  $t_{\text{R}}$  (minor) = 9.7.

$[\alpha]_{\text{D}}^{20.0} +36.5$  ( $c = 1$ ,  $\text{CHCl}_3$ ).

**2-Cyclohexyl-*N,N*-dimethyl-4-oxo-1,2,3,4-tetrahydroquinoline-3-carboxamide (24)**

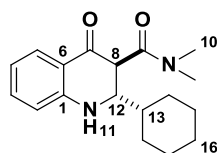

**Asymmetric:** prepared according to *general procedure 1*. Aniline **1** (50 mg, 0.24 mmol), cyclohexanecarboxaldehyde (58  $\mu\text{L}$ , 0.48 mmol). *Work-up procedure A* was employed: chromatography (silica gel, 0.5% methanol in dichloromethane). The product dihydroquinolone **24** (63 mg, 87%, 90:10 e.r., >20:1 dr) was obtained as a yellow foam.

**Racemic:** prepared according to *general procedure 2*.

$\delta_{\text{H}}$  (400 MHz,  $\text{CDCl}_3$ ): 7.81 (1H, dd,  $J$  7.9, 1.1, H5), 7.31 (1H, t,  $J$  7.6, H3), 6.74–6.66 (2H, m, H2 & H4), 4.31 (1H, br s, H11), 4.03 (1H, d,  $J$  11.1, H12), 3.89 (1H, d,  $J$  11.9, H8), 3.10 (3H, s, H10), 3.07 (3H, s, H10'), 1.90–1.57 (6H, m, H13 & 5 x H14/H15/H16), 1.41–1.11 (5H, m, 5 x H14/H15/H16).

$\delta_{\text{C}}$  (126 MHz,  $\text{CDCl}_3$ ): 190.7 (C7), 168.7 (C9), 151.2 (C1), 135.4 (C3), 127.7 (C5), 118.4 (C6), 117.8 (C4), 115.8 (C2), 59.5 (C12), 52.5 (C8), 39.2 (C13), 37.7 (C10), 35.7 (C10'), 30.4 (C14/C15/C16), 26.7 (C14/C15/C16), 26.4 (C14/C15/C16), 26.3(5) (C14/C15/C16), 26.2(9) (C14/C15/C16).

$\nu_{\text{max}}$  (neat): 3339 (NH), 2927 (CH), 2853 (CH), 1634, 1612 (amide), 1484, 1398, 759, 731  $\text{cm}^{-1}$ .

HRMS (ESI<sup>+</sup>): found 323.1731;  $\text{C}_{18}\text{H}_{24}\text{N}_2\text{NaO}_2$ ,  $[\text{M}+\text{Na}]^+$  requires 323.1731.

MP: 140–142  $^{\circ}\text{C}$  (dichloromethane).



$[\alpha]_{\text{D}}^{20.0} + 334.0$  ( $c = 1$ ,  $\text{CHCl}_3$ ).

HPLC (Chiralpak ODH, 30% IPA, 70% hexane,  $1.0 \text{ mL} \cdot \text{min}^{-1}$ ,  $\lambda = 245$ ):  $t_{\text{R}}(\text{major}) = 5.3$ ,  $t_{\text{R}}(\text{minor}) = 9.8$ .

***N,N*-Dimethyl-4-oxo-2-(pentan-3-yl)-1,2,3,4-tetrahydroquinoline-3-carboxamide (25)**

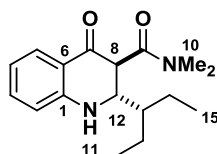

***Asymmetric:*** prepared according to ***general procedure 1***. Aniline **1** (50 mg, 0.24 mmol), cyclohexanecarboxaldehyde (59  $\mu\text{L}$ , 0.48 mmol). *Work-up procedure A* was employed: chromatography (silica gel, 0.5% methanol in dichloromethane). The product dihydroquinolone **25** (69 mg, 99%, 77% ee, >20:1 dr) was obtained as a yellow foam.

***Racemic:*** prepared according to ***general procedure 2***.

$\delta_{\text{H}}$  (400 MHz,  $\text{CDCl}_3$ ) 7.81 (1 H, dd,  $J$  7.9, 1.3, H5), 7.30 (1 H, ddd,  $J$  8.4, 7.0, 1.5, H3), 6.74 – 6.66 (2 H, m, H2 & H4), 4.26 (1 H, dd,  $J$  12.8, 2.1, H12), 4.22 (1 H, br s, H11), 3.93 (1 H, d,  $J$  12.7, H8), 3.09 (3 H, s, H10), 3.07 (3 H, s, H10'), 1.69 – 1.44 (3 H, m, H13 & 2 x H14), 1.40 – 1.15 (2 H, m, 2 x H14), 1.01 (3 H, t,  $J$  7.4, H15), 0.95 (3 H, t,  $J$  7.4, H15').

$\delta_{\text{C}}$  (101 MHz,  $\text{CDCl}_3$ ) 190.7 (C7), 168.6 (C9), 151.4 (C1), 135.4 (C3), 127.9 (C5), 118.3 (C6), 117.7 (C4), 115.8 (C2), 56.5 (C12), 52.8 (C8), 42.2 (C13), 37.7 (C10), 35.7 (C10'), 23.4 (C14), 21.7 (C14'), 12.7 (C15), 11.8 (C15').

$\nu_{\text{max}}$  (neat): 3339, 2961, 2874, 1634, 1612, 1509, 1484, 1259, 1150, 758  $\text{cm}^{-1}$ .

HRMS (ESI): found 311.1721;  $\text{C}_{17}\text{H}_{14}\text{N}_2\text{NaO}_2$   $[\text{M}+\text{Na}]^+$  requires 311.1730.

MP: 96–98 °C (dichloromethane).

HPLC (Chiralpak IC, 50% IPA, 50% hexane, 1.0 mL.min<sup>-1</sup>,  $\lambda$  = 245):  $t_R$  (major) = 10.0,  $t_R$  (minor) = 13.6.

$[\alpha]_D^{20.0} +219.8$  ( $c$  = 1, CHCl<sub>3</sub>).

## 2-Cyclopropyl-*N,N*-dimethyl-4-oxo-1,2,3,4-tetrahydroquinoline-3-carboxamide (26)

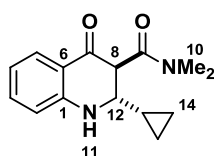

**Asymmetric:** prepared according to *general procedure 1*. Aniline **1** (50 mg, 0.24 mmol), cyclopropanecarboxaldehyde (36  $\mu$ L, 0.48 mmol). *Work-up procedure A* was employed: chromatography (silica gel, 0.5% methanol in dichloromethane). The product dihydroquinolone **26** (60 mg, 97%, 65:35 e.r., >20:1 dr) was obtained as a yellow foam.

**Racemic:** prepared according to *general procedure 2*.

$\delta_H$  (400 MHz, CDCl<sub>3</sub>) 7.81 (1 H, dd,  $J$  8.0, 1.6, H5), 7.30 (1 H, ddd,  $J$  8.3, 7.0, 1.5, H3), 6.77 – 6.55 (2 H, m, H2 & H4), 4.48 (1 H, s, H11), 3.92 (1 H, d,  $J$  12.4, H8), 3.38 (1 H, dd,  $J$  12.3, 9.0, H12), 3.14 (3 H, s, H10), 3.07 (3 H, s, H10'), 1.09 – 0.89 (1 H, m, H13), 0.64 – 0.51 (3 H, m 3 x H14), 0.39 – 0.26 (1 H, m, H14).

$\delta_C$  (101 MHz, CDCl<sub>3</sub>) 188.3 (C7), 166.6 (C9), 148.9 (C1), 133.4 (C5), 125.8 (C3), 116.3 (C6), 115.8 (C4), 113.5 (C2), 58.0 (C12), 54.3 (C8), 35.8 (C10), 33.6 (C10'), 13.7 (C13), 1.1 (C14), 0.0 (C14').

HRMS (ESI<sup>+</sup>): found 281.1266; C<sub>15</sub>H<sub>18</sub>N<sub>2</sub>NaO<sub>2</sub>, [M+Na]<sup>+</sup> requires 281.1260.

$\nu_{\text{max}}$  (neat): 3324, 3005, 1637, 1612, 1505, 1483, 757  $\text{cm}^{-1}$ .

HPLC (Chiralpak IC, 50% IPA, 50% hexane, 1.0  $\text{mL}\cdot\text{min}^{-1}$ ,  $\lambda = 245$ ):  $t_{\text{R}}$  (major) = 14.2,  $t_{\text{R}}$  (minor) = 18.5.

$[\alpha]_{\text{D}}^{20.0} +88.8$  ( $c = 1$ ,  $\text{CHCl}_3$ ).

**2-(*Tert*-butyl)-*N,N*-dimethyl-4-oxo-1,2,3,4-tetrahydroquinoline-3-carboxamide (27)**

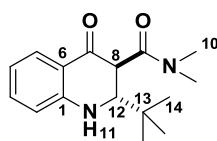

**Asymmetric:** prepared according to *general procedure 1*. Aniline **1** (50 mg, 0.24 mmol), pivaldehyde (52  $\mu\text{L}$ , 0.48 mmol). *Work-up procedure A* was employed: chromatography (silica gel, 1% methanol in dichloromethane). The product dihydroquinolone **27** (62 mg, 94%, 90:10 e.r., >20:1 dr) was obtained as a yellow solid.

**Racemic:** prepared according to *general procedure 2*.

$\delta_{\text{H}}$  (400 MHz,  $\text{CDCl}_3$ ): 7.67 (1H, dd,  $J$  8.3, 1.4, H5), 7.24 (1H, ddd,  $J$  8.2, 7.2, 1.3, H3), 6.62–6.56 (2H, m, H2 & H4), 4.60 (1H, br s, H11), 3.96 (1H, d,  $J$  5.4, H8), 3.76 (1H, dd,  $J$  5.2, 2.1, H12), 3.25 (3H, s, H10), 2.97 (3H, s, H10'), 0.98 (9H, s, H14).

$\delta_{\text{C}}$  (101 MHz,  $\text{CDCl}_3$ ): 190.1 (C7), 169.4 (C9), 150.9 (C1), 135.9 (C3), 127.4 (C5), 116.7 (C4), 116.5 (C6), 115.2 (C2), 62.3 (C12), 49.6 (C8), 38.1 (C10), 36.2 (C10'), 29.7 (C13), 26.4 (C14).

$\nu_{\text{max}}$  (neat): 3343 (NH), 2918 (CH), 1613 (amide), 1529, 1485, 1445, 1143, 1054, 906, 758  $\text{cm}^{-1}$ .

HRMS (ESI<sup>+</sup>): found 297.1572;  $\text{C}_{16}\text{H}_{22}\text{N}_2\text{NaO}_2$ ,  $[\text{M}+\text{Na}]^+$  requires 297.1573.

MP: 124–128  $^{\circ}\text{C}$  (dichloromethane).

HPLC (Chiralpak IA, 30% IPA, 70% hexane, 1.0 mL.min<sup>-1</sup>,  $\lambda$  = 245):  $t_R$  (major) = 7.7,  $t_R$  (minor) = 5.6.

$[\alpha]_D^{20.0} +616.6$  ( $c$  = 0.11, CHCl<sub>3</sub>).

**(±)-3-Benzyl-*N,N*-dimethyl-4-oxo-2-phenyl-1,2,3,4-tetrahydroquinoline-3-carboxamide (29)**

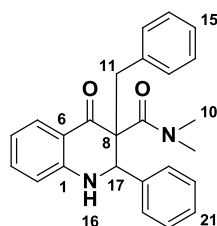

Benzaldehyde (7  $\mu$ L, 0.07 mmol) was added to a stirred RT solution of aniline **28** (10 mg, 0.033 mmol) and scandium(III) trifluoromethanesulfonate (2 mg, 4  $\mu$ mol) in dichloromethane (0.5 mL). After 16 h the solvent was removed *in vacuo* and the residue was purified by flash column chromatography (silica gel, petrol:ethyl acetate, 4:1) to afford dihydroquinolone **29** (9 mg, 69%) as a yellow solid.

$\delta_H$  (CDCl<sub>3</sub>, 500 MHz): 7.74 (1H, dd,  $J$  7.9, 1.3, H5), 7.40–7.34 (4H, m, H3, H13 & H21), 7.34–7.30 (2H, m, H14), 7.16–7.10 (5H, m, H15, H19, H20), 6.79 (1H, t,  $J$  7.6, H4), 6.71 (1H, d,  $J$  8.2, H2), 5.37 (1H, s, H17), 4.72 (1H, br s, H16), 3.21 (1H, d,  $J$  13.3, H11), 3.14 (1H, d,  $J$  13.2 H11'), 2.88 (3H, br s, H10), 2.68 (3H, br s, H10).

$\delta_C$  (CDCl<sub>3</sub>, 126 MHz):\* 168.5 (C9), 149.7 (C1), 137.2 (C12/C18), 137.1 (C12/C18), 135.5 (C3), 131.4 (C19), 128.9 (C21), 128.7 (C13), 128.2 (C5), 127.9 (C14), 127.5 (C20), 126.4 (C15), 118.8 (C6), 118.3 (C4), 115.4 (C2), 63.9 (C8), 63.7 (C17), 38.6 (C10), 37.6 (C10'), 34.8 (C11).

MP: 214–220 °C (ethyl acetate/petrol).

\* The <sup>13</sup>C peak corresponding to C7 was not observed.

HRMS (ESI+): found 407.1714;  $C_{25}H_{24}N_2NaO_2$ ,  $[M+Na]^+$  requires 407.1730.

$\nu_{\max}$  (neat): 3328 (NH), 2924 (CH), 2853 (CH), 1738, 1636, 1609, 1154, 728, 697  $cm^{-1}$ .

### 3. SCREENING ASYMMETRIC CONDITIONS

#### 3.1 Asymmetric Lewis Acidic Conditions

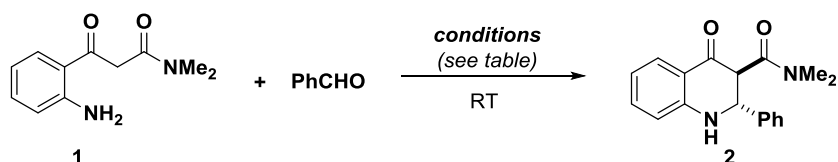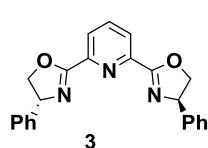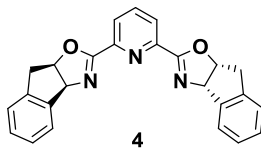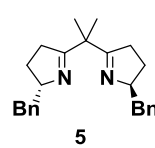

| Entry <sup>i</sup> | Solvent <sup>ii</sup>           | Catalyst <sup>iii</sup>         | Ligand (eq.)     | Conversion (time) <sup>iv</sup> | e.r. <sup>v</sup> |
|--------------------|---------------------------------|---------------------------------|------------------|---------------------------------|-------------------|
| 1 <sup>15</sup>    | 1:1 THF:PhMe                    | Sc(OTf) <sub>3</sub>            | <b>5</b> (0.11)  | 100% (2 h)                      | 50:50             |
| 2 <sup>15</sup>    | 1:1 THF:PhMe                    | Sc(OTf) <sub>3</sub>            | <b>3</b> (0.11)  | 100% (2 h)                      | 50:50             |
| 3 <sup>15</sup>    | 1:1 THF:PhMe                    | Cu(OTf) <sub>2</sub>            | <b>5</b> (0.11)  | 56% (16 h)                      | 50:50             |
| 4 <sup>15</sup>    | 1:1 THF:PhMe                    | Cu(OTf) <sub>2</sub>            | <b>3</b> (0.11)  | 49% (16 h)                      | 50:50             |
| 5 <sup>15</sup>    | 1:1 THF:PhMe                    | Zn(OTf) <sub>2</sub>            | <b>5</b> (0.11)  | 0% (16 h)                       | -                 |
| 6 <sup>15</sup>    | 1:1 THF:PhMe                    | Zn(OTf) <sub>2</sub>            | <b>3</b> (0.11)  | 0% (16 h)                       | -                 |
| 7 <sup>16</sup>    | MeCN                            | Sc(OTf) <sub>3</sub>            | <b>3</b> (0.2)   | 100% (20 min)                   | 54:46             |
| 8 <sup>17</sup>    | CH <sub>2</sub> Cl <sub>2</sub> | Sc(OTf) <sub>3</sub> (0.01 eq.) | <b>3</b> (0.025) | 100% (3 h)                      | 50:50             |
| 9 <sup>17</sup>    | CH <sub>2</sub> Cl <sub>2</sub> | Sc(OTf) <sub>3</sub> (0.01 eq.) | <b>4</b> (0.025) | 100% (3 h)                      | 52:48             |

[i] References given where literature procedures were followed. [ii] All reactions were carried out on 25–50 mg scale (aniline) with 2.0 eq. aldehyde at RT. Unless stated otherwise, all reactions were carried out using 0.1 eq. catalyst. [iii] In all cases the catalyst and ligand were stirred for 1–3 h in the presence of powdered 3 or 4 Å molecular sieves prior to adding the aniline and aldehyde. [iv] Values determined by <sup>1</sup>H NMR analysis after reaction reached completeness (TLC) or after 16 h. [v] Determined by chiral HPLC.

Entries 1–6. These reactions were carried out by analogy to a literature protocol, according to the following general procedure:<sup>15</sup>

A suspension of *the appropriate metal triflate* (0.012 mmol), *the appropriate ligand* (0.013 mmol) and 4 Å powdered molecular sieves (30 mg) in tetrahydrofuran (1 mL) was stirred for 2 h at RT. Amine **1** (25 mg, 0.12 mmol) in toluene (1 mL) and benzaldehyde (24 µL, 0.24 mmol) were added. *Reaction completeness was monitored approximately by TLC and conversion was determined by <sup>1</sup>H NMR analysis. HPLC analysis was carried out on pure samples of the product **2** isolated by small-scale preparative TLC.*

Entry 7. *This reaction was carried out by analogy to a literature procedure.*<sup>16</sup>

A suspension of scandium(III) triflate (12 mg, 0.024 mmol), (R)-phenylpybox **3** (18 mg, 0.049 mmol) and 3 Å powdered molecular sieves (150 mg) in acetonitrile (3 mL) was stirred vigorously for 80 min. Aniline **1** (50 mg, 0.24 mmol) and benzaldehyde (49 µL, 0.48 mmol) were added, and the reaction was monitored by TLC. After 20 min TLC indicated consumption of the starting material; the reaction mixture was concentrated *in vacuo* and <sup>1</sup>H NMR analysis of the crude material indicated complete conversion to the product. The crude residue was purified by column chromatography (silica gel, 99:1, dichloromethane:methanol) to afford dihydroquinolone **2** (66 mg, 93%, 54:46 e.r.) as a yellow crystalline solid.

Entries 8 & 9. *These reactions were carried out by analogy to a literature protocol, according to the following general procedure:*<sup>17</sup>

A suspension of scandium(III) triflate (1.2 mg, 0.0024 mmol), *the appropriate ligand* (0.060 mmol) and 4 Å powdered molecular sieves (25 mg) in dichloromethane (1 mL) was stirred for 3 h at RT. Aniline **1** (50 mg, 0.24 mmol) and benzaldehyde (49 µL, 0.48 mmol) were added. *Reaction completeness was monitored approximately by TLC and conversion was determined by <sup>1</sup>H NMR analysis.. HPLC analysis was carried out on pure samples of the product **2** isolated by small-scale preparative TLC.*

## 3.2 Asymmetric Brønsted Acidic Conditions

### 3.2.1 Catalyst Screening

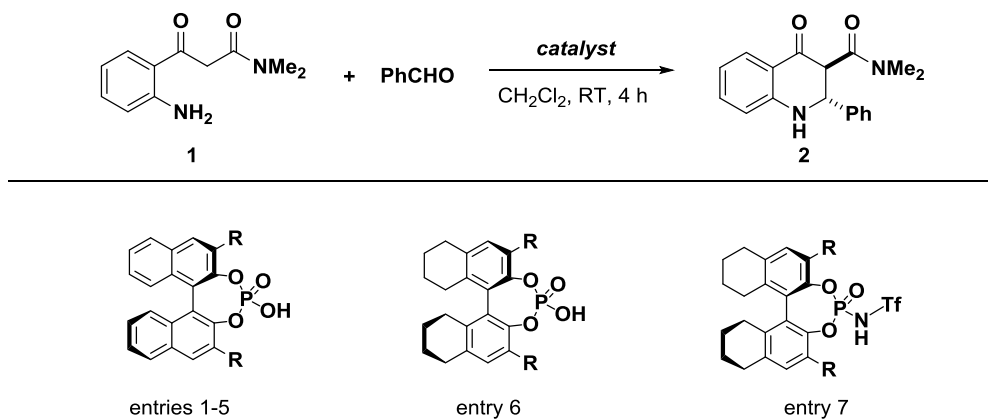

| Entry | R | e.r. <sup>ii</sup> |
|-------|---|--------------------|
| 1     |   | 67:33              |
| 2     |   | 47:53              |
| 3     |   | 46:54              |
| 4     |   | 53:47              |
| 5     |   | 54:46              |
| 6     |   | 41:59              |
| 7     |   | 51:49              |

[i] All reactions were carried out at RT on a 10 mg scale (aniline) with 2.0 eq. benzaldehyde and 5 mol% catalyst in dichloromethane at an aniline concentration of 0.1 M. All reactions went to completion (TLC) after 4 h. Yields not determined. [ii] Determined by chiral HPLC.



### 3.2.2 Solvent Screen

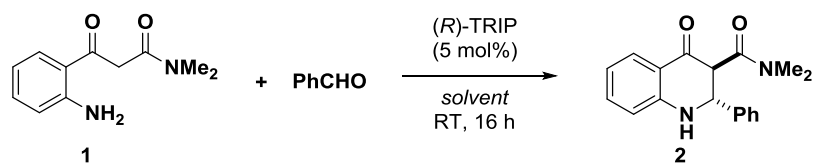

| Entry <sup>i</sup> | Solvent                         | Aniline conc. / M | e.r. <sup>ii</sup>   |
|--------------------|---------------------------------|-------------------|----------------------|
| 1                  | CH <sub>2</sub> Cl <sub>2</sub> | 0.05              | 57:43                |
| 2                  | CH <sub>2</sub> Cl <sub>2</sub> | 0.10              | 67:33                |
| 3                  | CH <sub>2</sub> Cl <sub>2</sub> | 0.20              | 56:44                |
| 4                  | MeCN                            | 0.10              | 54:46                |
| 5                  | MeOH                            | 0.10              | 47:53 <sup>iii</sup> |
| 6                  | THF                             | 0.10              | 51:49                |
| 7                  | Et <sub>2</sub> O               | 0.10              | 64:46                |
| 8                  | iPr <sub>2</sub> O              | 0.10              | ~60:40 <sup>iv</sup> |
| 9                  | PhMe                            | 0.10              | 70:30                |
| 10                 | PhCl                            | 0.10              | 70:30                |

[i] All reactions were carried out at RT on a 10 mg scale (aniline) with 2.0 eq. benzaldehyde and 5 mol% catalyst, and were analysed after 16 h. Yields not determined. [ii] Determined by chiral HPLC. [iii] Unidentified contaminant present in HPLC trace; ee value may be inaccurate. [iv] ee value approximate due to poor conversion leading to high noise/signal ratio in HPLC trace.

### 3.3 Optimization of Reaction Conditions for use of Catalyst 7

#### 3.3.1 Temperature Screen

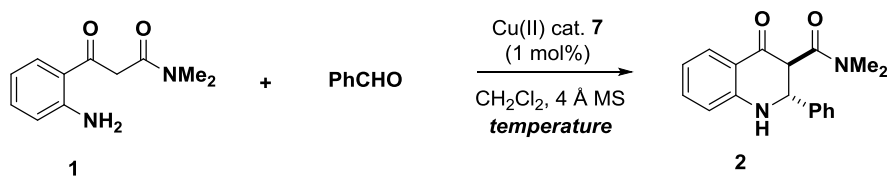

| Entry <sup>i</sup> | Temp. / °C | Conv. / % (time) <sup>ii</sup> | e.r. <sup>iii</sup> |
|--------------------|------------|--------------------------------|---------------------|
| 1                  | RT         | 100 (1 h)                      | 70:30               |
| 2                  | −30        | 84 (16 h)                      | 70:30               |
| 3                  | −50        | 25 (16 h)                      | 69:31               |
| 4                  | −78        | ~5 (48 h)                      | 63:37               |

[i] All reactions were carried out on a 25 mg scale (aniline) with 2.0 eq. aldehyde and 1 mol% catalyst **7** at an aniline concentration of 0.1 M. Yields not determined. [ii] Determined by <sup>1</sup>H NMR analysis of the crude reaction mixture. [iii] Determined by chiral HPLC.

#### Procedure:

Benzaldehyde (25 µL, 0.25 mmol) was added to a stirred suspension of aniline **1** (25 mg, 0.12 mmol), oven-dried 4 Å molecular sieves (25 mg) and copper catalyst **7** (2.2 mg, 1.2 µmol) in dichloromethane (1.25 mL) at the appropriate temperature. After the indicated time period the reaction was diluted with dichloromethane (100 mL) and filtered over a short plug of silica to remove the catalyst, and the solvents removed *in vacuo*. <sup>1</sup>H NMR analysis was carried out on the crude material. HPLC analysis was carried out on pure samples of the product **2** isolated by small-scale preparative TLC.

### 3.3.2 Solvent Screen

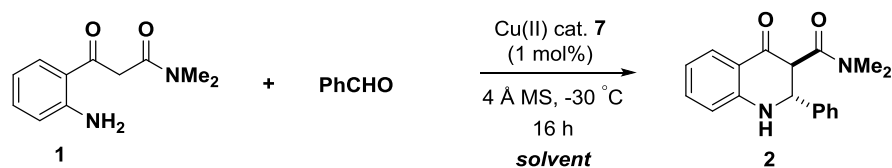

| Entry <sup>i</sup> | Solvent                         | Conv. / % <sup>ii</sup> | e.r. <sup>iii</sup> |
|--------------------|---------------------------------|-------------------------|---------------------|
| 1                  | CH <sub>2</sub> Cl <sub>2</sub> | 84                      | 70:30               |
| 2                  | MeCN                            | NR                      | -                   |
| 3                  | PhCl                            | 55                      | 52:48               |
| 4                  | MeOH                            | NR                      | -                   |
| 5                  | THF                             | 70                      | 76:24               |

[i] All reactions were carried out on a 25 mg scale (aniline) with 2.0 eq. aldehyde and 1 mol% catalyst **7** at an aniline concentration of 0.1 M in the presence of 4 Å MS, and were analysed after 16 h. Yields not determined. [ii] Determined by <sup>1</sup>H NMR analysis of the crude reaction mixture. [iii] Determined by chiral HPLC.

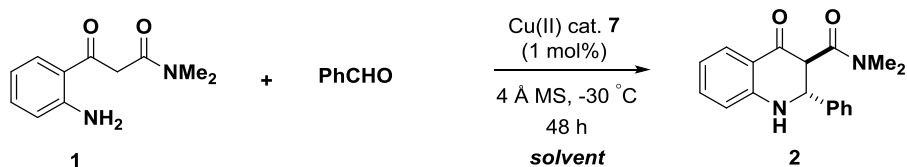

| Entry <sup>i</sup> | Solvent ratio THF:PhMe v/v | Aniline conc. / M | e.r. <sup>iii</sup> |
|--------------------|----------------------------|-------------------|---------------------|
| 1                  | 1:0                        | 0.1               | 76:24               |
| 2                  | 10:1                       | 0.1               | 77:23               |
| 3                  | 1:1                        | 0.1               | 80:20               |
| 4                  | 1:10                       | 0.1               | 64:36               |
| 5                  | 1:0                        | 0.05              | 76:24               |

[i] All reactions were carried out on a 25 mg (aniline) scale with 2.0 eq. aldehyde and 1 mol% catalyst **7** in the presence of 4 Å MS, and were analysed after 48 h. Yields not determined. All reactions went to completion (TLC, <sup>1</sup>H NMR). [iii] Determined by chiral HPLC.

#### Procedure

Benzaldehyde (25  $\mu$ L, 0.25 mmol) was added to a stirred  $-30\text{ }^{\circ}\text{C}$  suspension of aniline **1** (25 mg, 0.12 mmol), oven-dried 4 Å molecular sieves (25 mg) and copper catalyst **7** (2.2 mg, 1.2  $\mu$ mol) in *the appropriate solvent at the indicated concentration*. After *the indicated time period* the reaction was diluted with dichloromethane (100 mL) and filtered over a short plug of silica to remove the catalyst, and the solvents removed *in vacuo*.  *$^1\text{H}$  NMR analysis was carried out on the crude material. HPLC analysis was carried out on pure samples of the product **2** isolated by small-scale preparative TLC.*

## 4. NMR SPECTRA

## 4.1 Substrates and Precursors

S1

Mar18-2013-4  
Instrument AVN400  
Chemist pck  
Group MDS  
18.21  
h1acq.crl CDCl3 {C:\NMR} mdsgrp 4

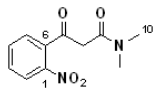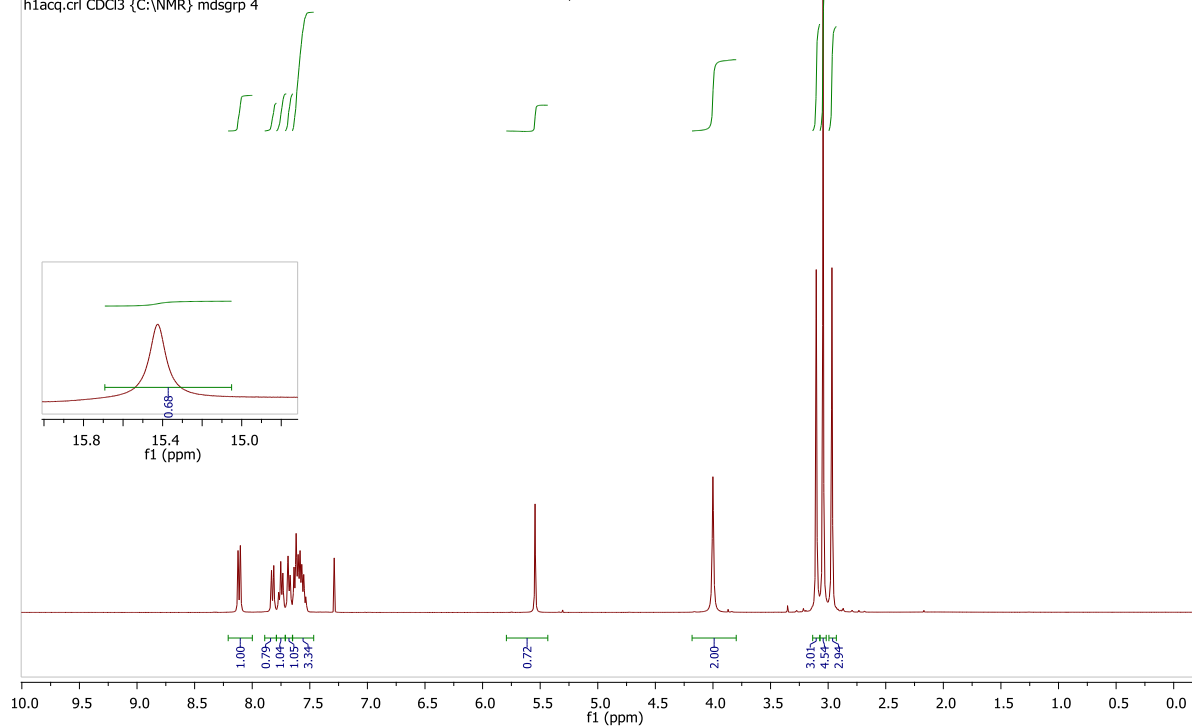

Mar18-2013-4  
Instrument AVN400  
Chemist pck  
Group MDS  
18.21  
DEPTQ.crl CDCl3 {C:\NMR} mdsgrp 4

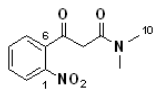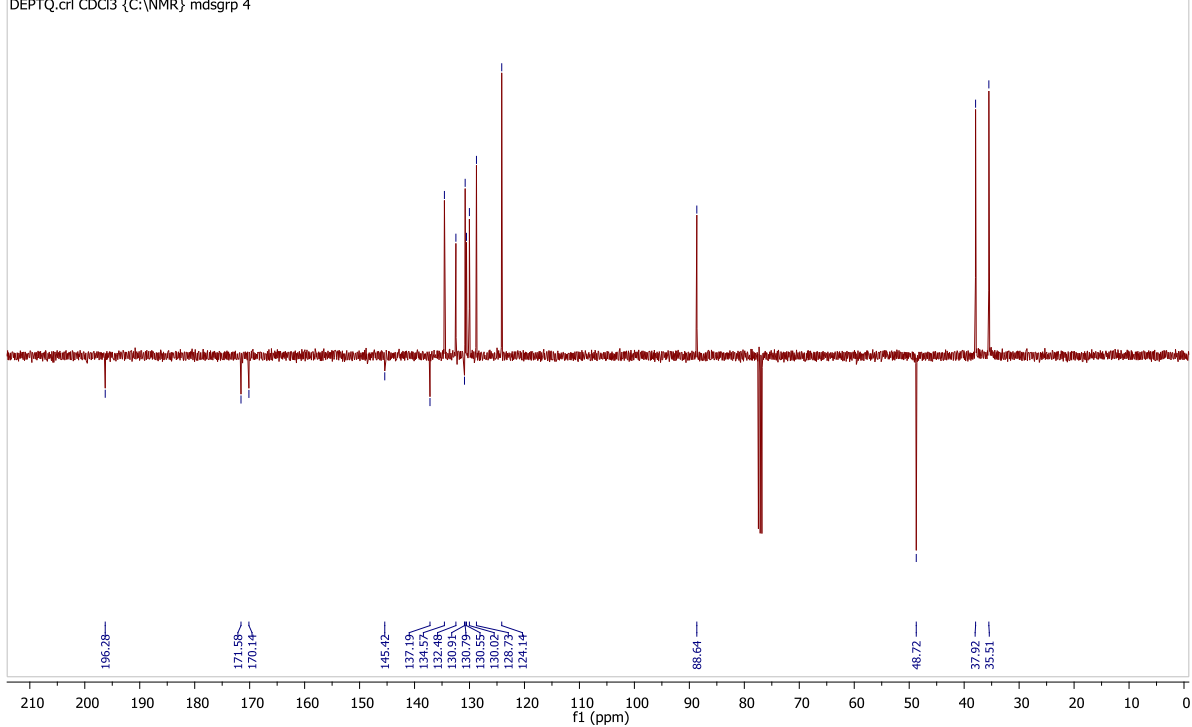

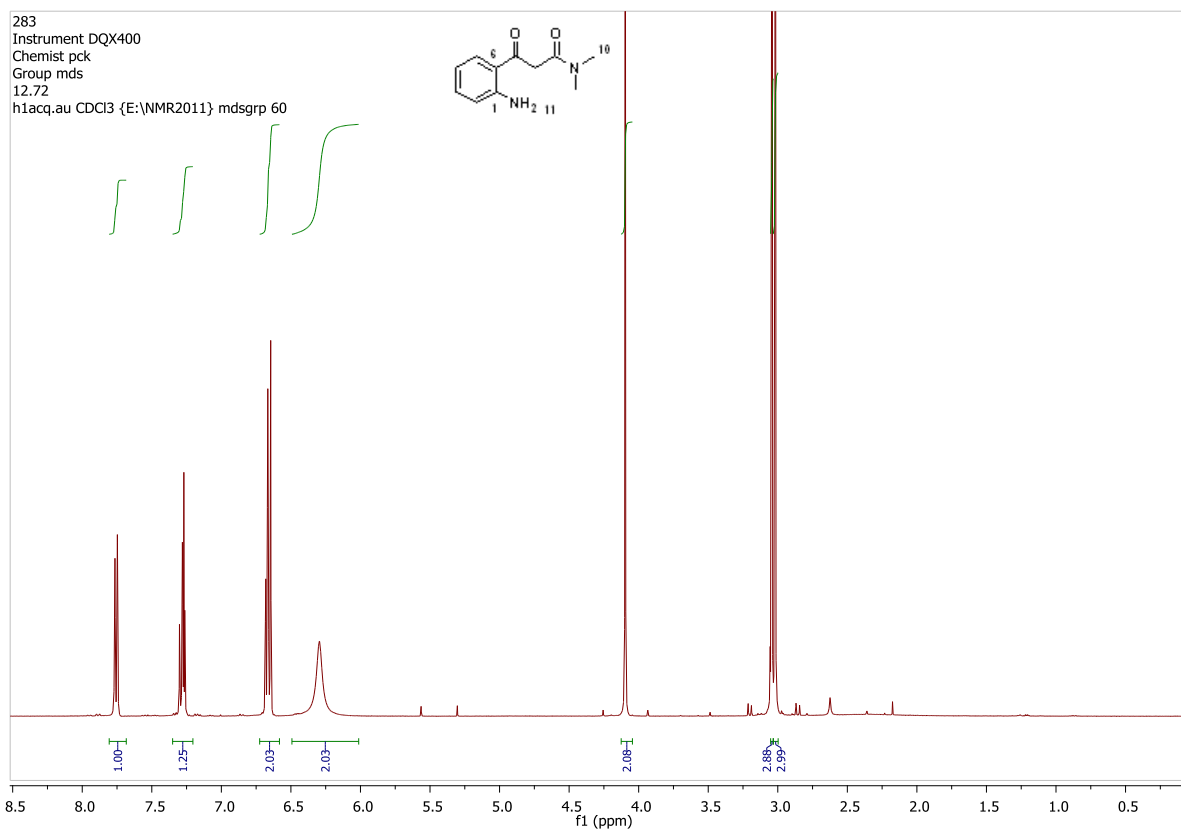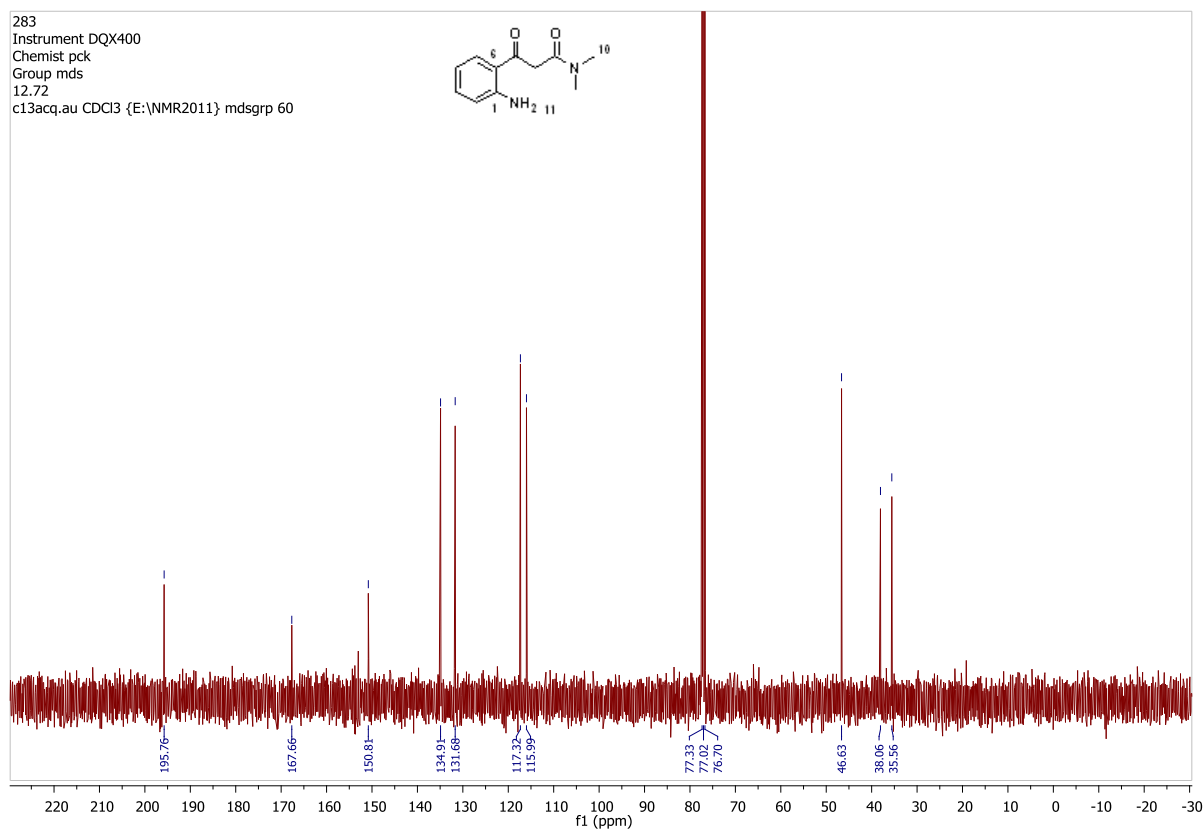



S2

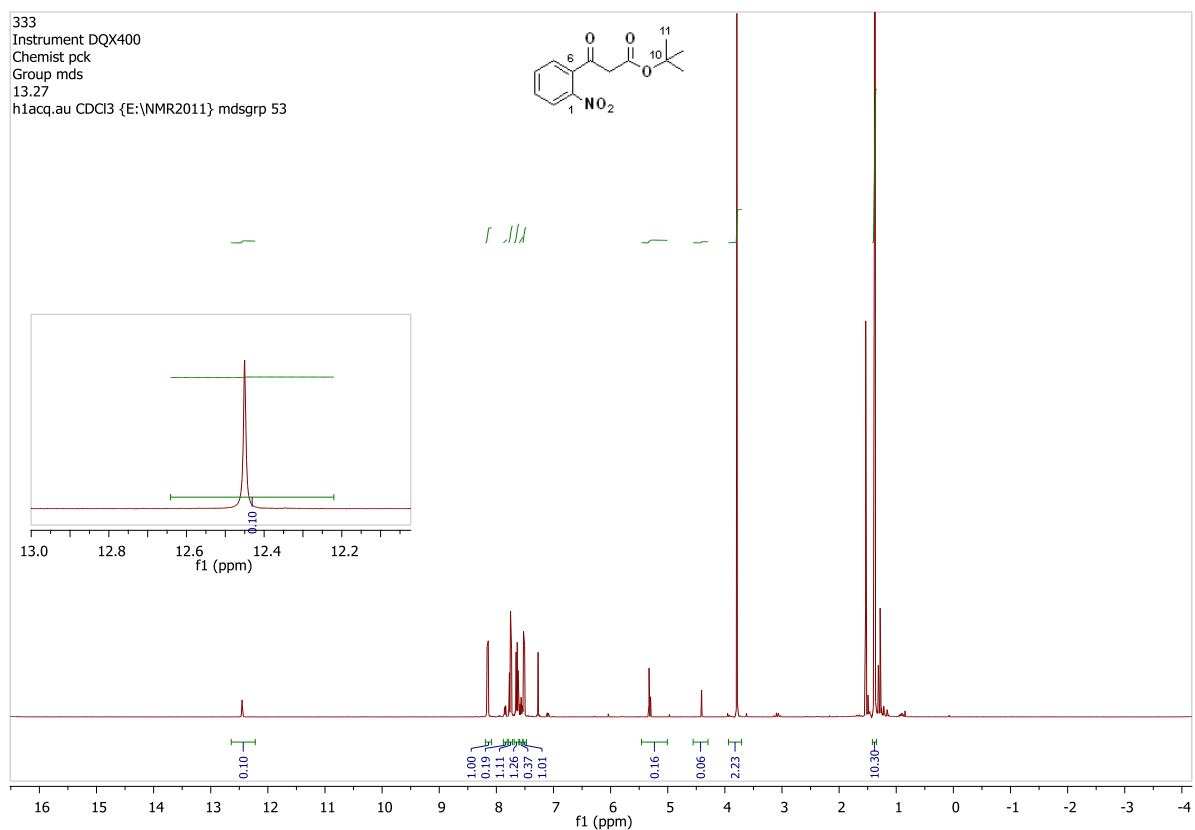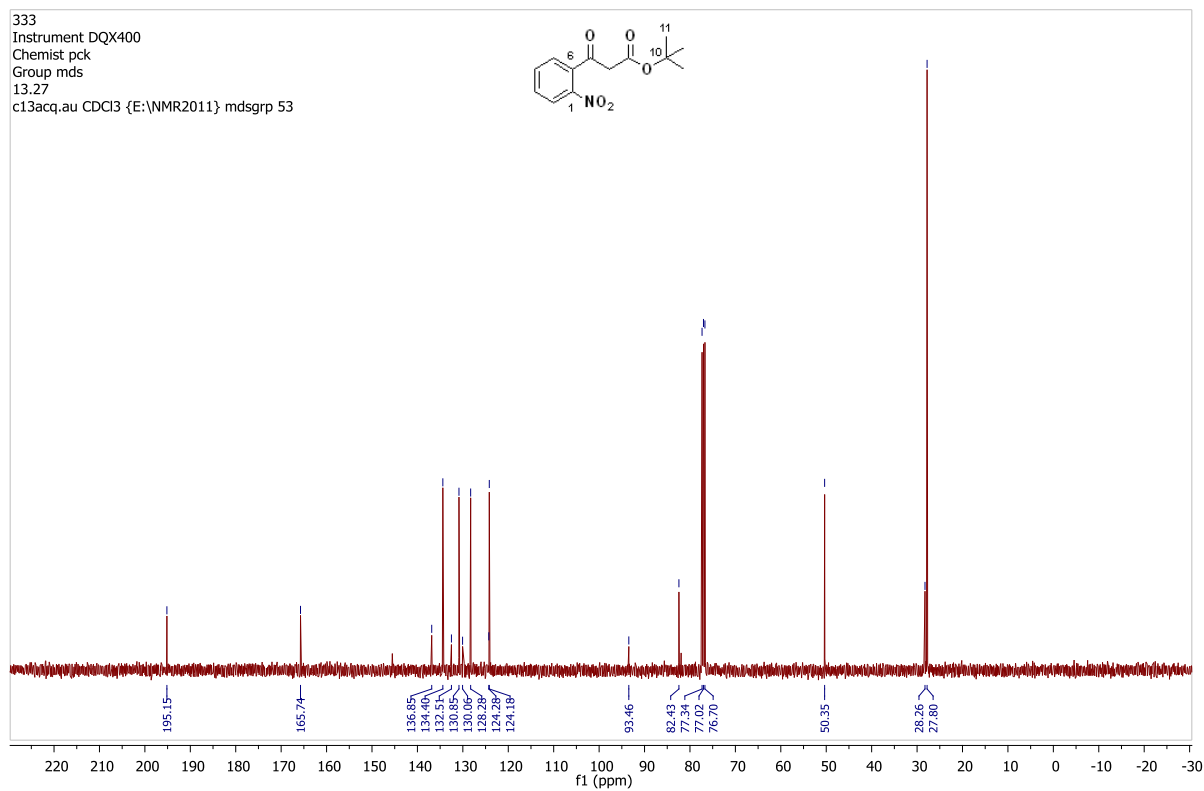

# S3

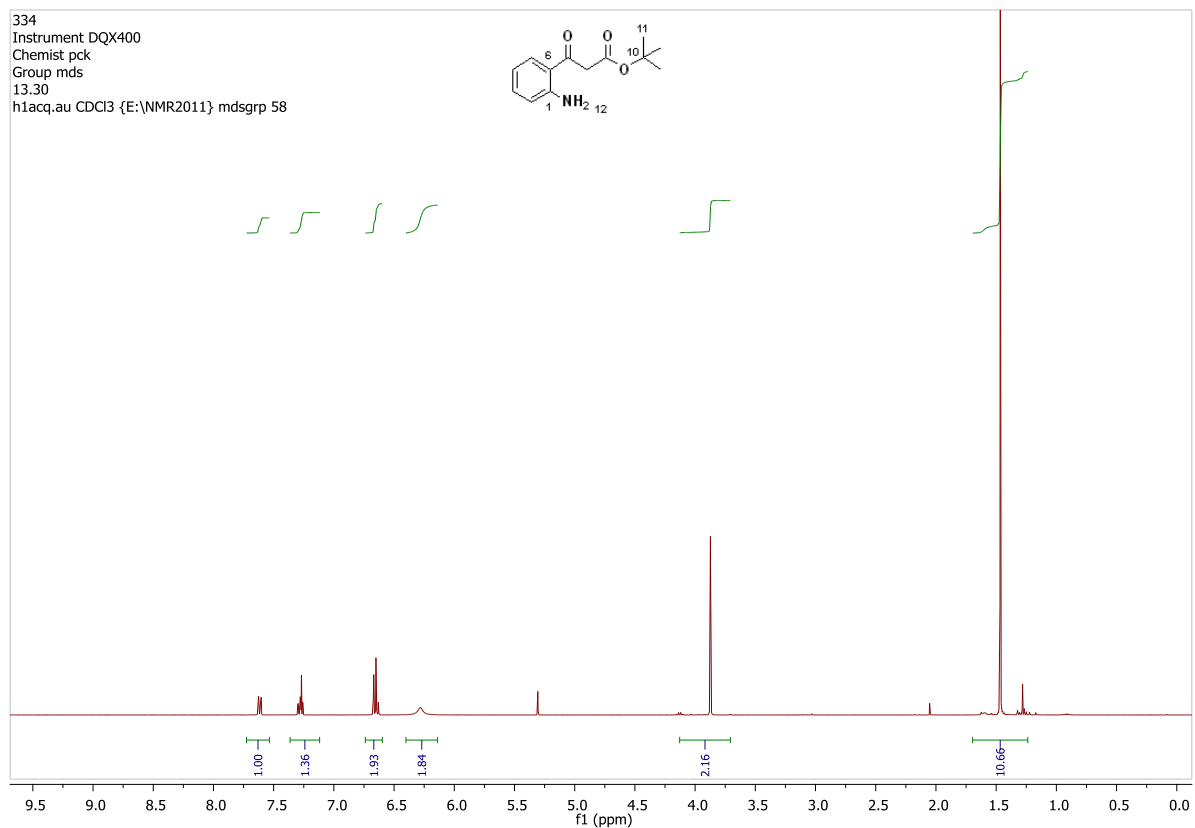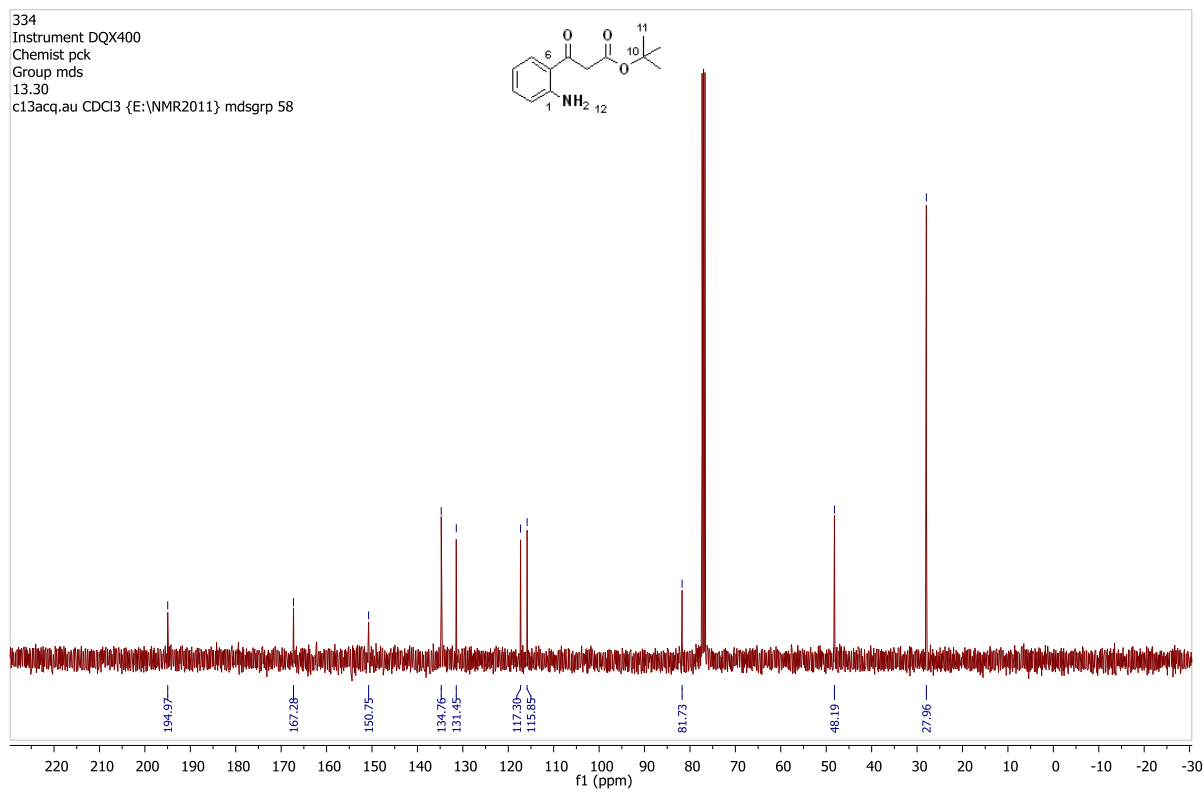

S4

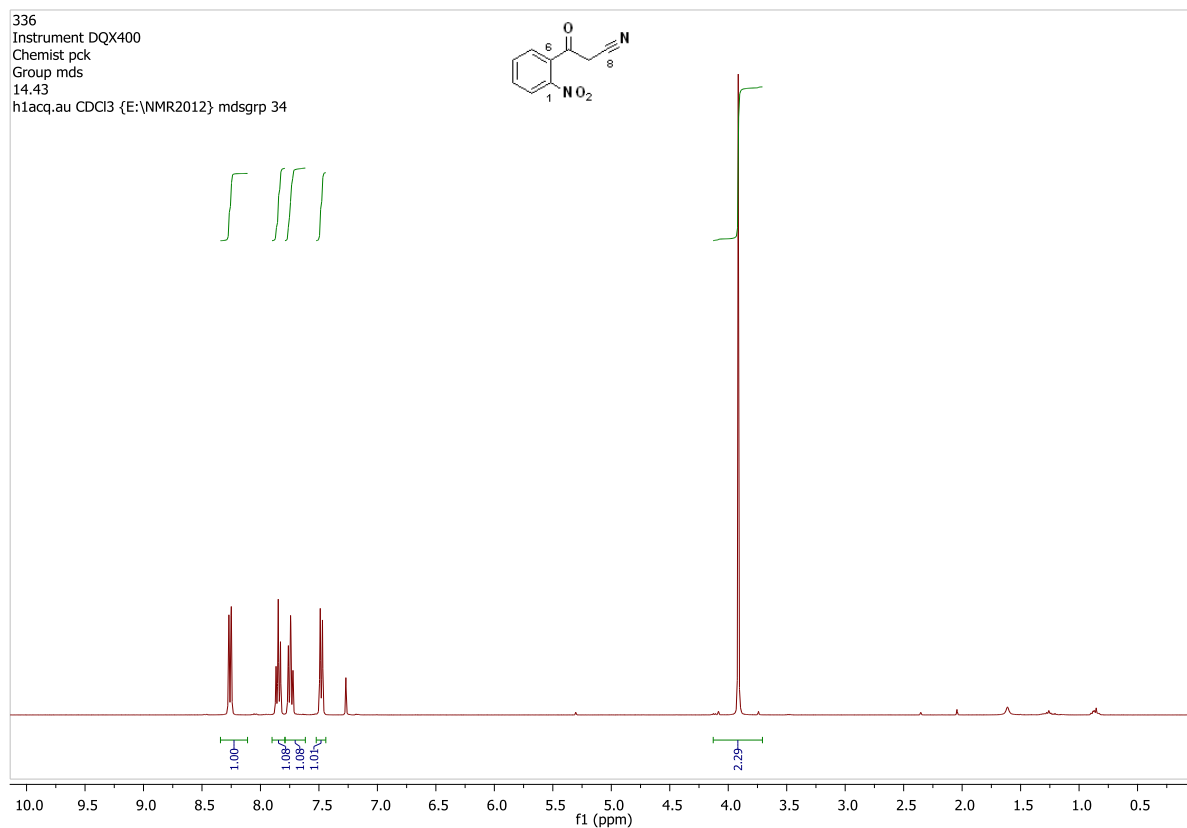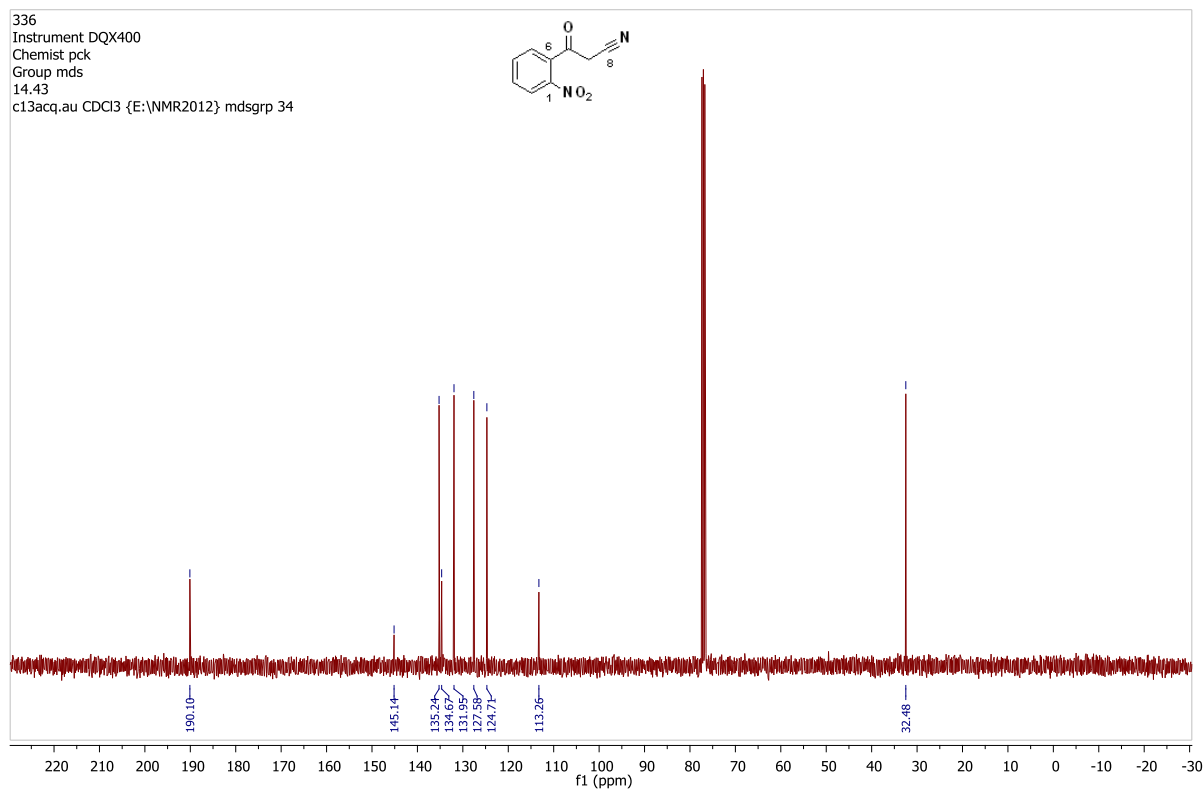

S5

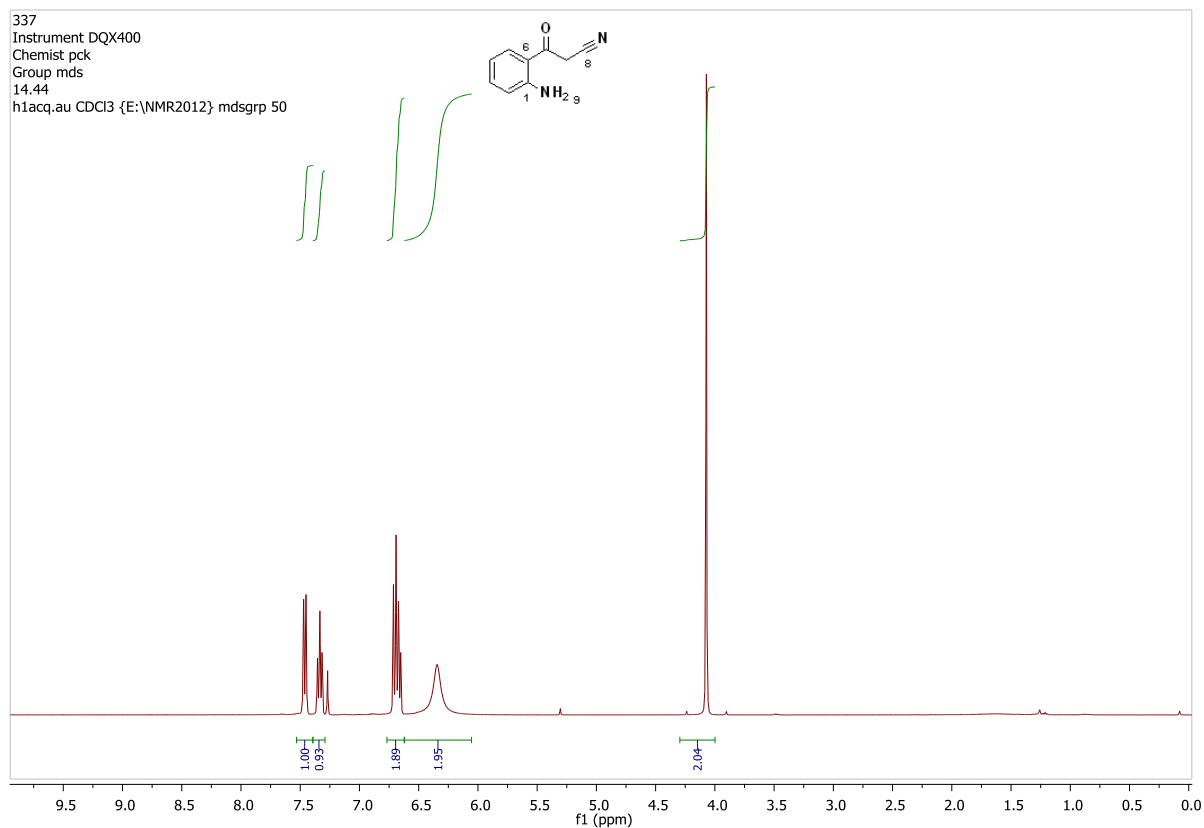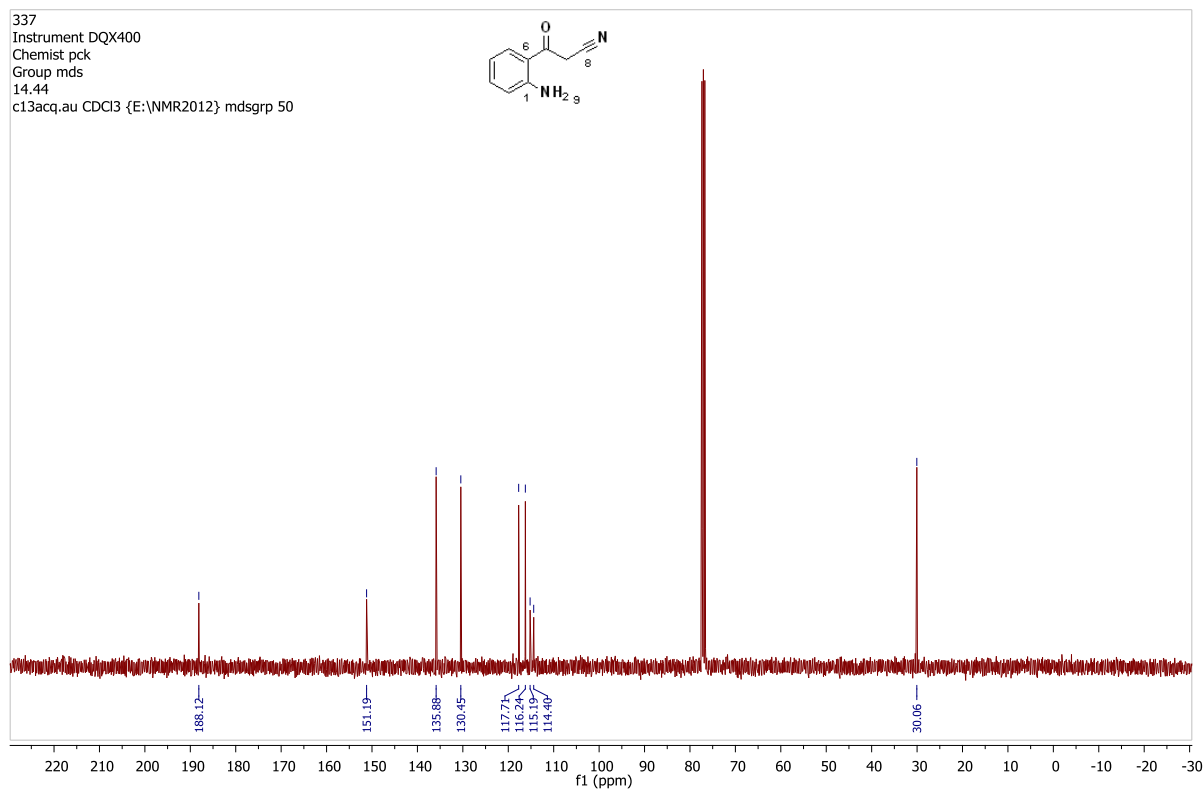

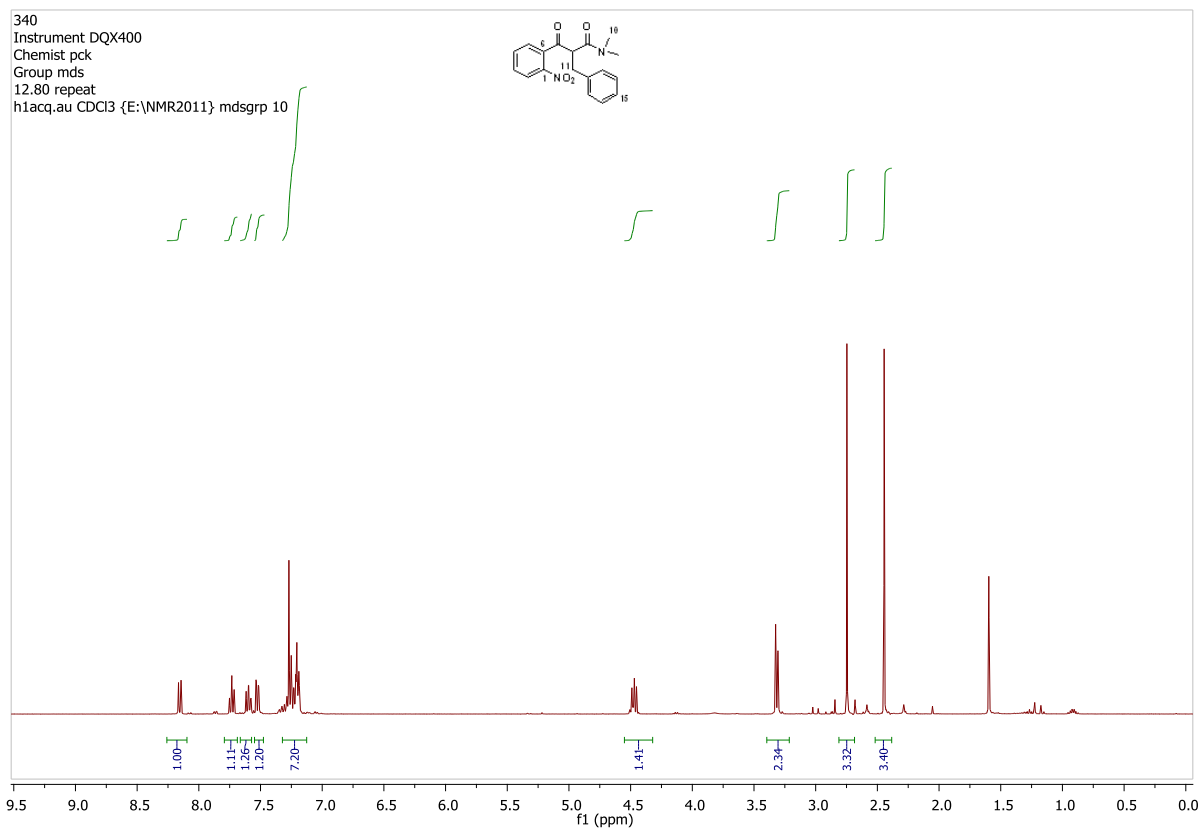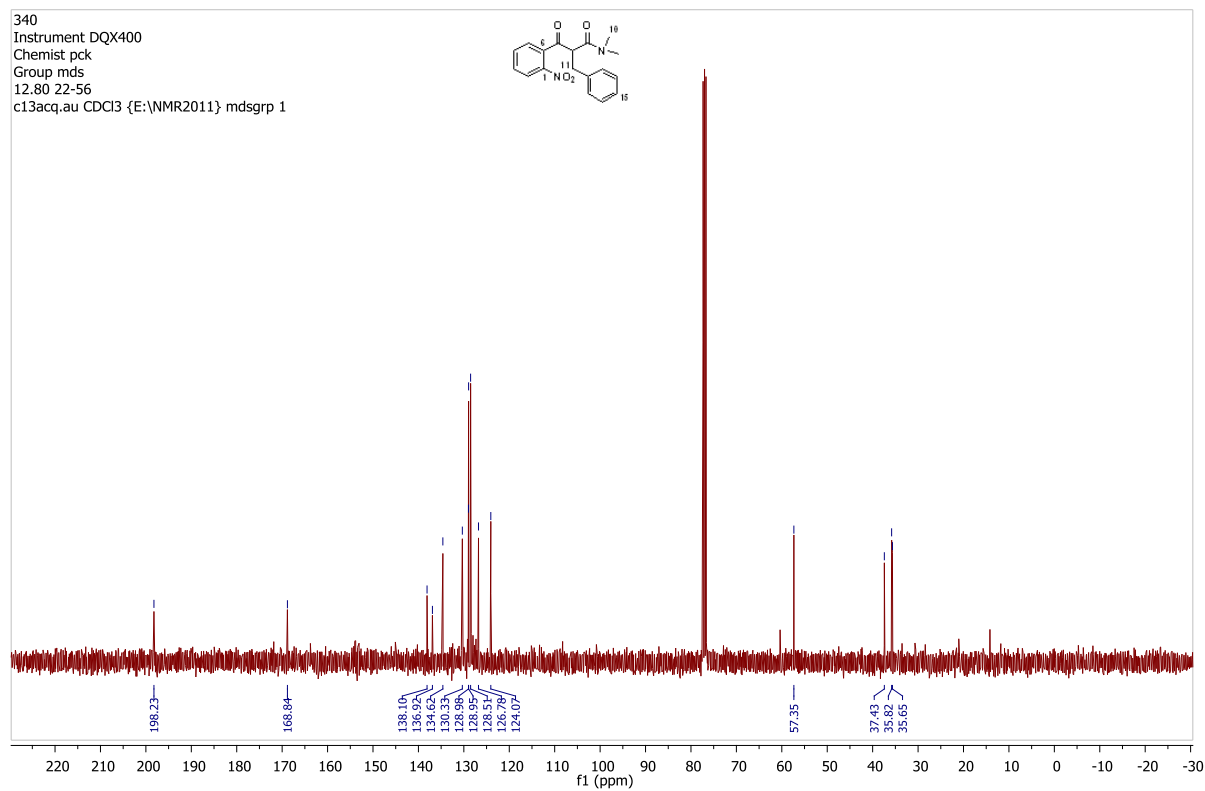

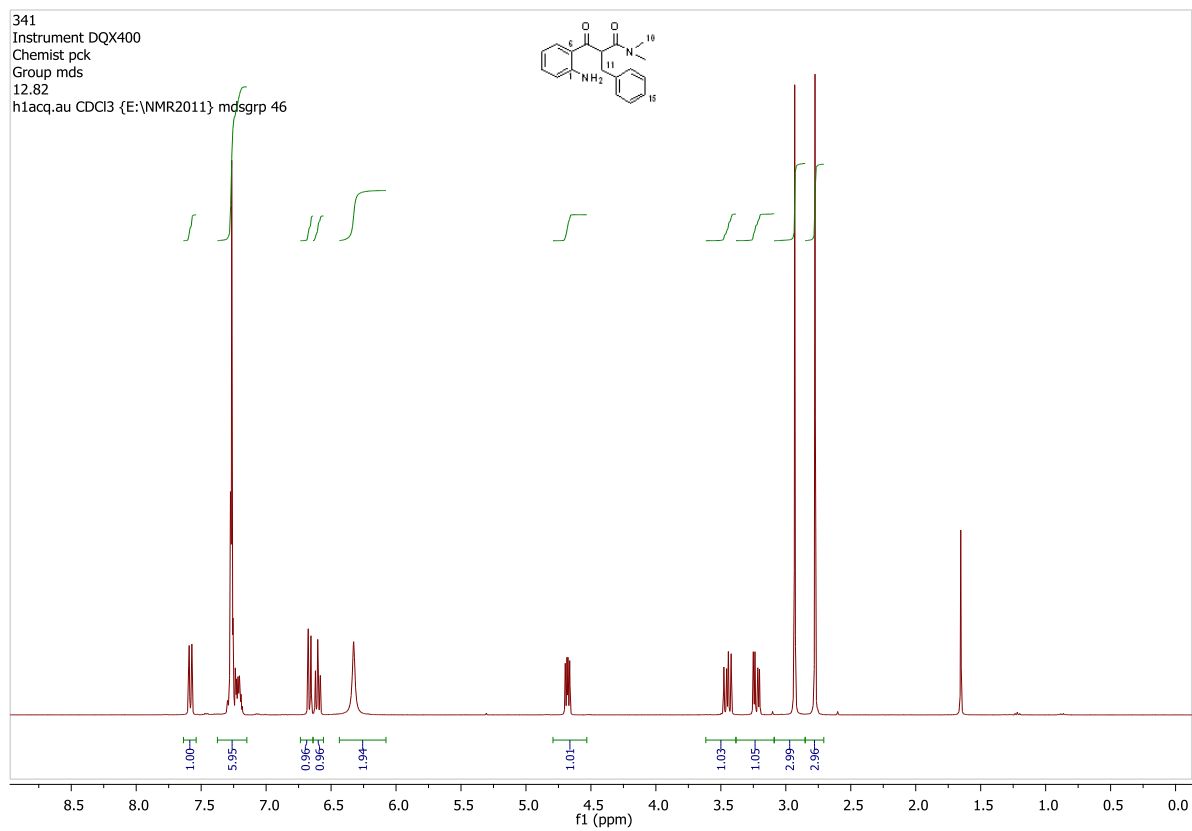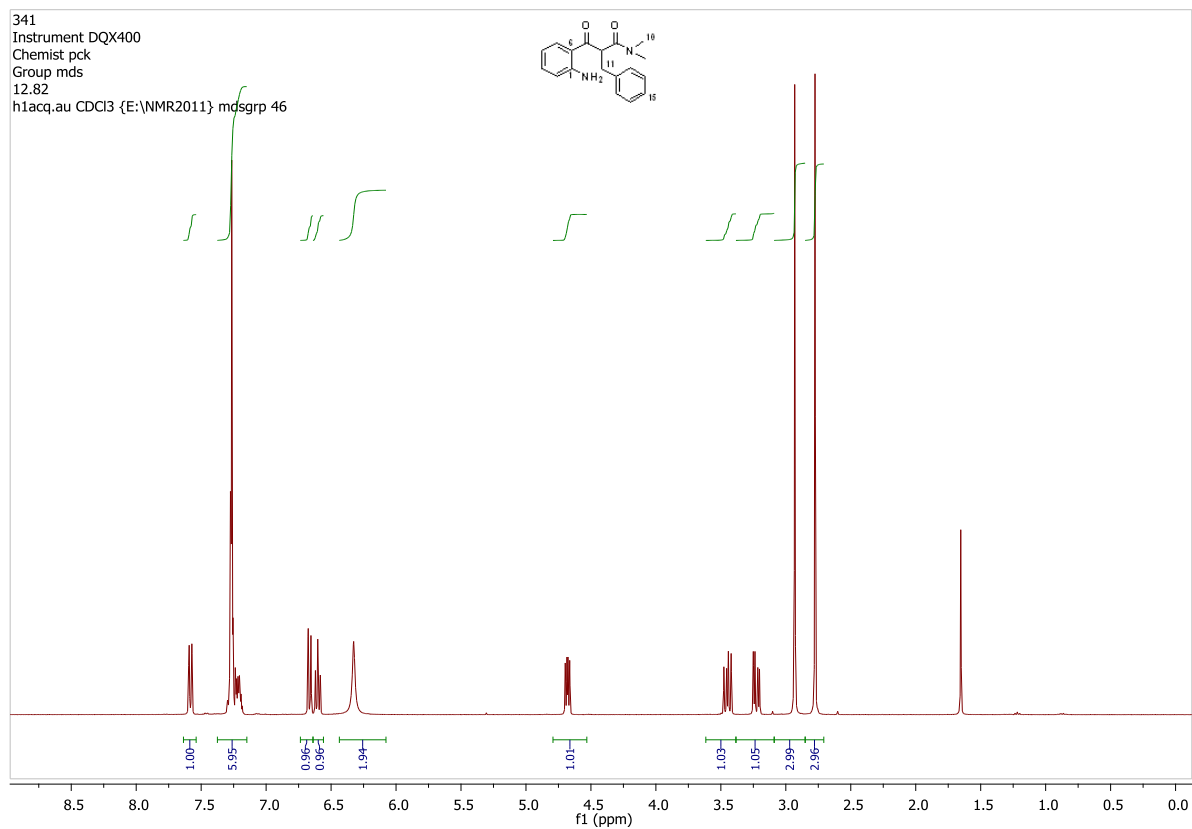

## 4.2 Catalysts and Precursors

3

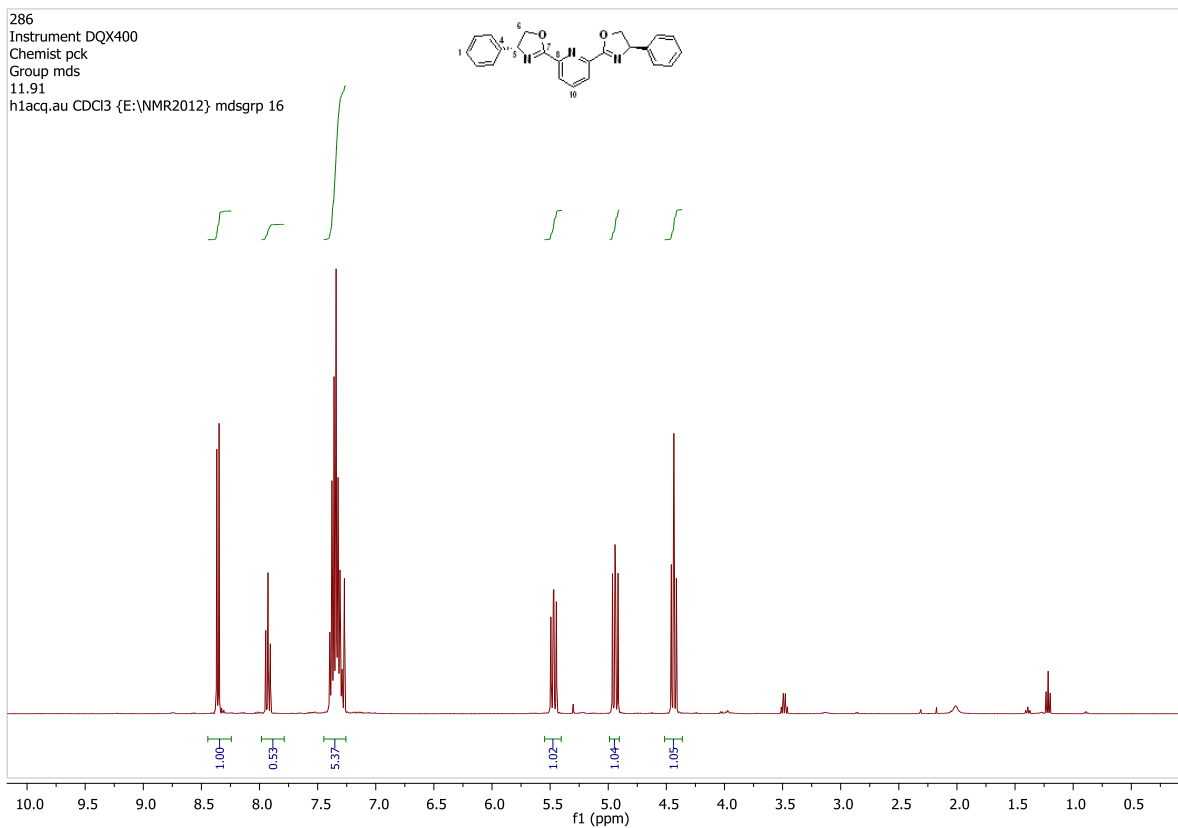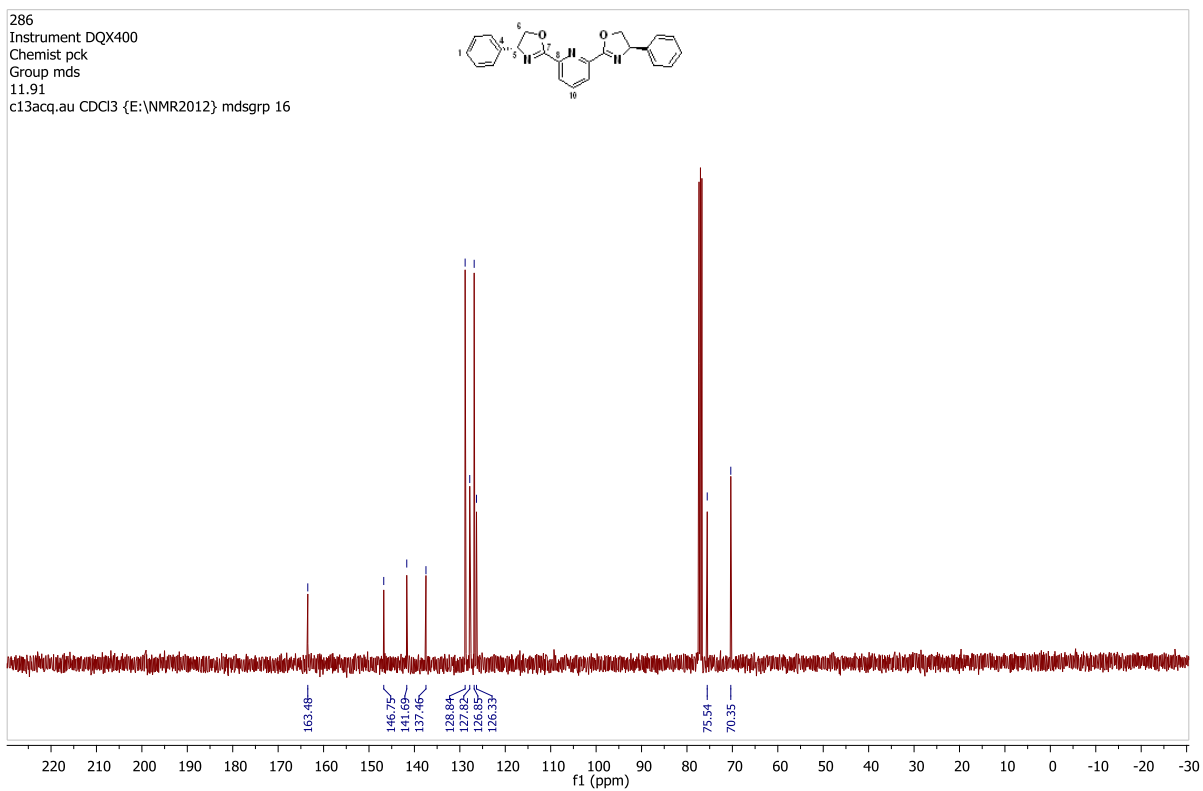

S7



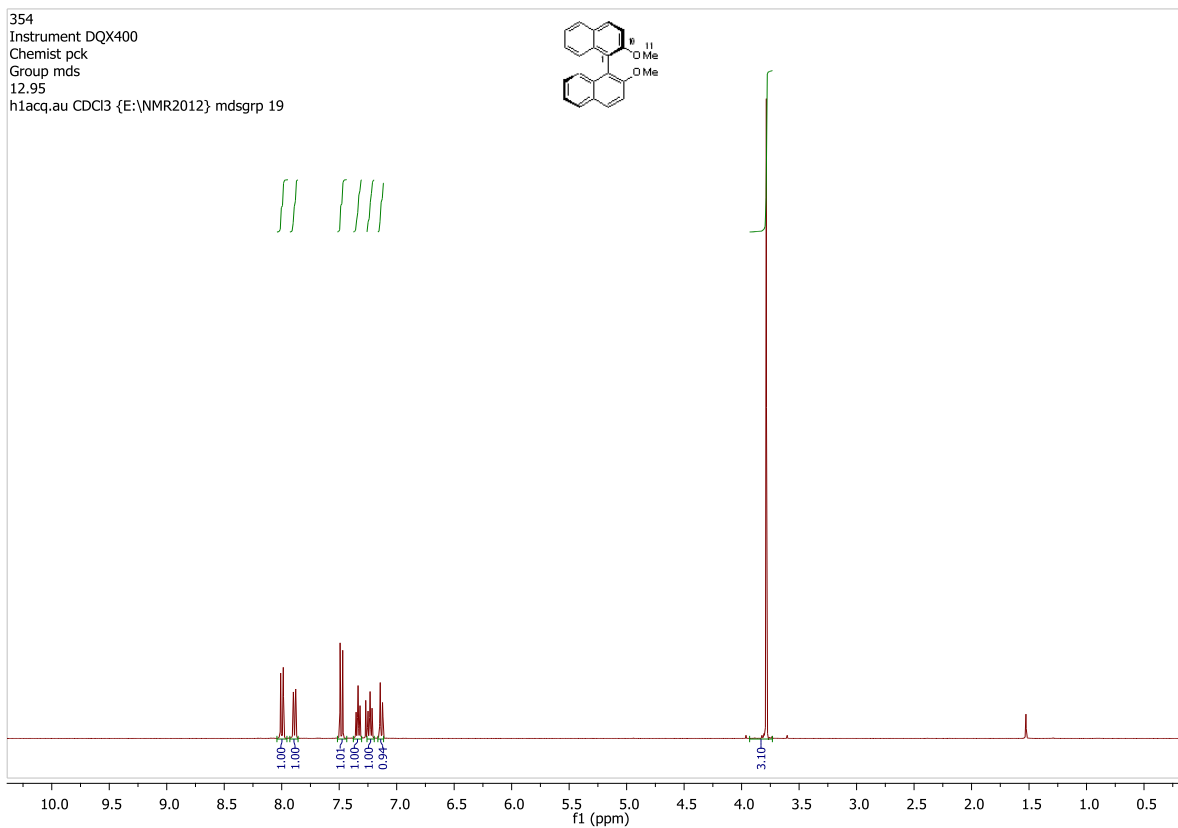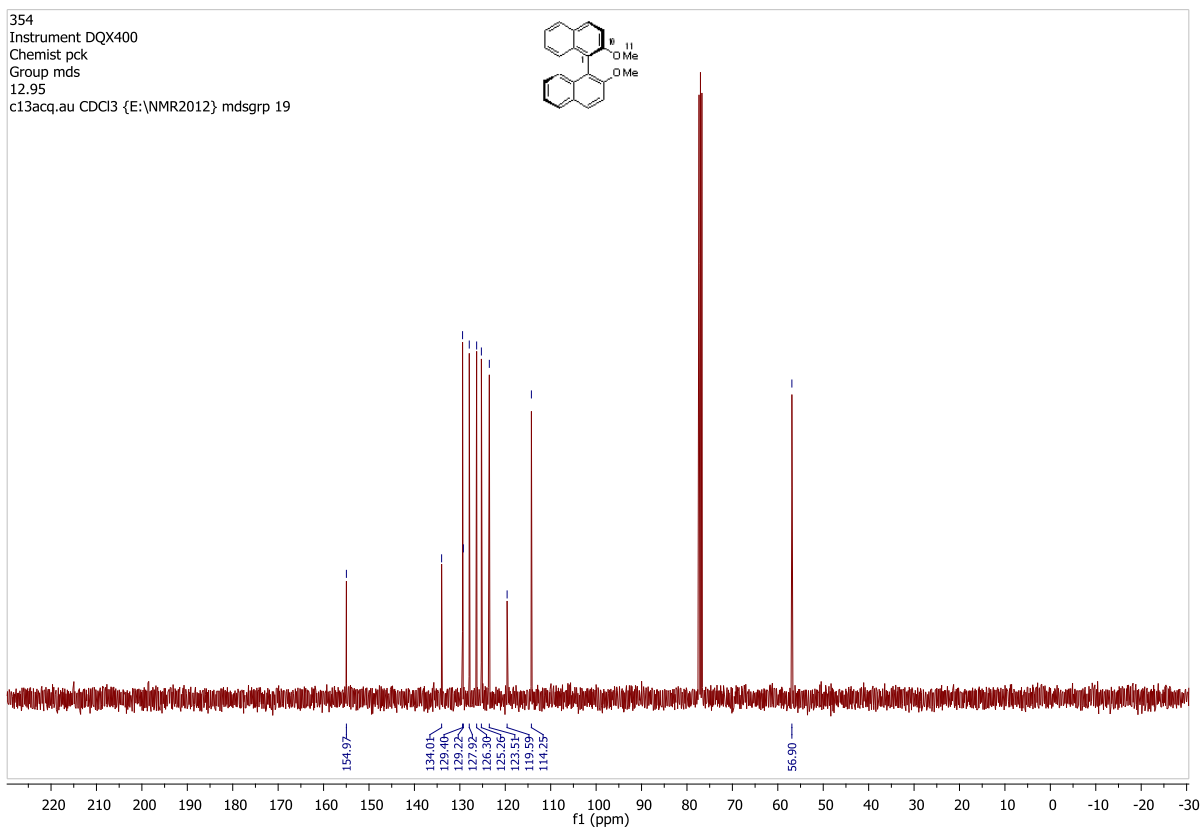

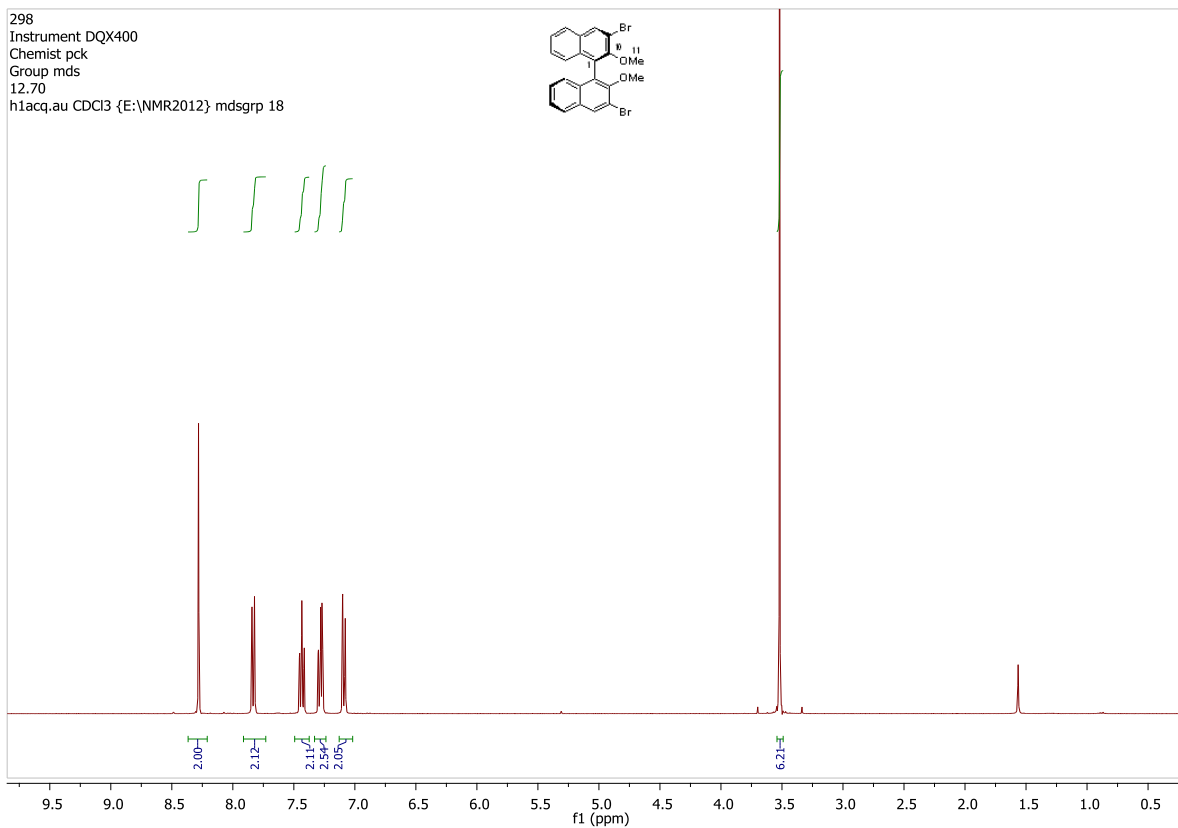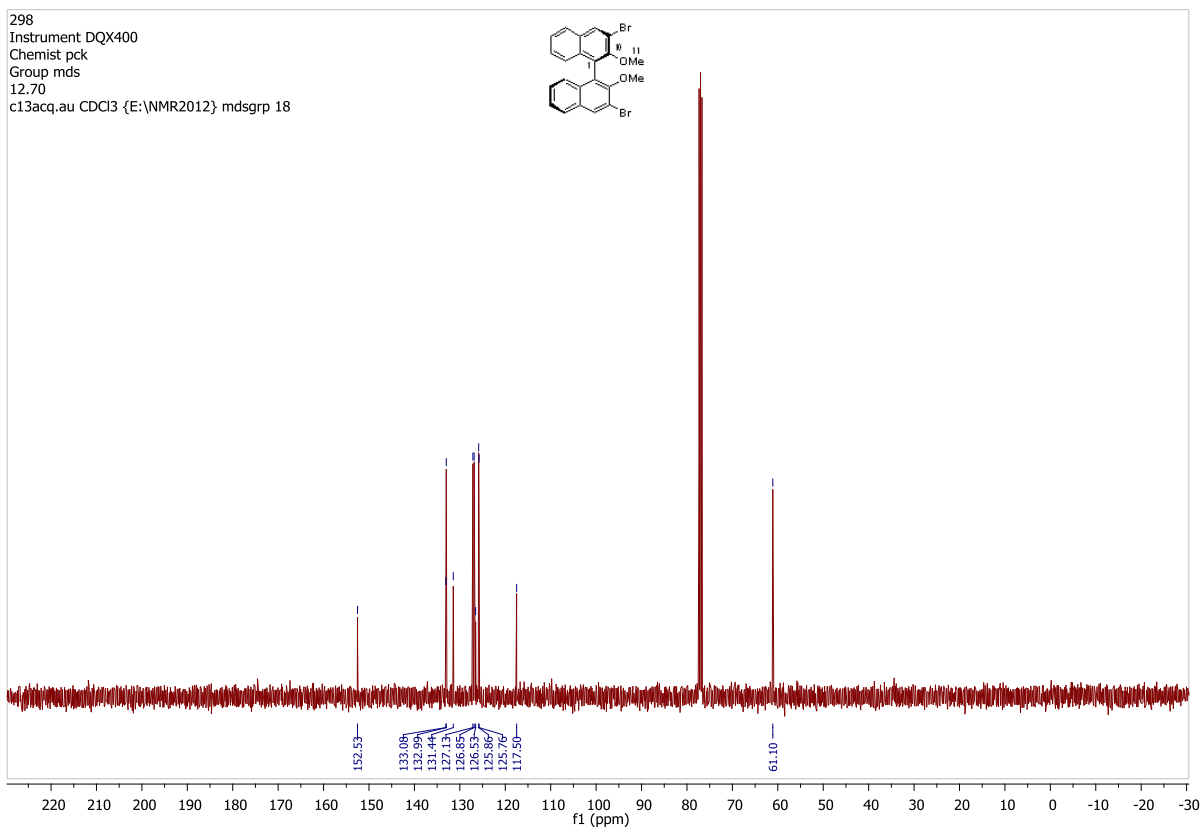

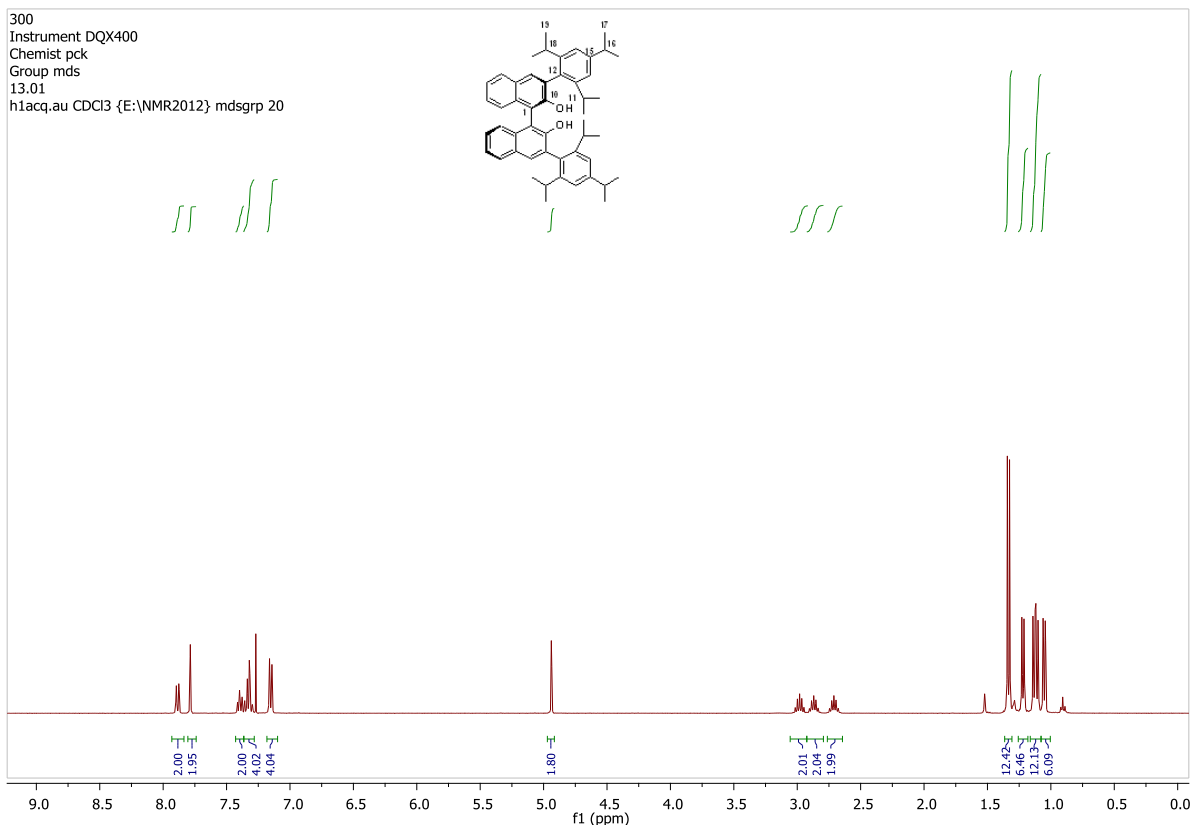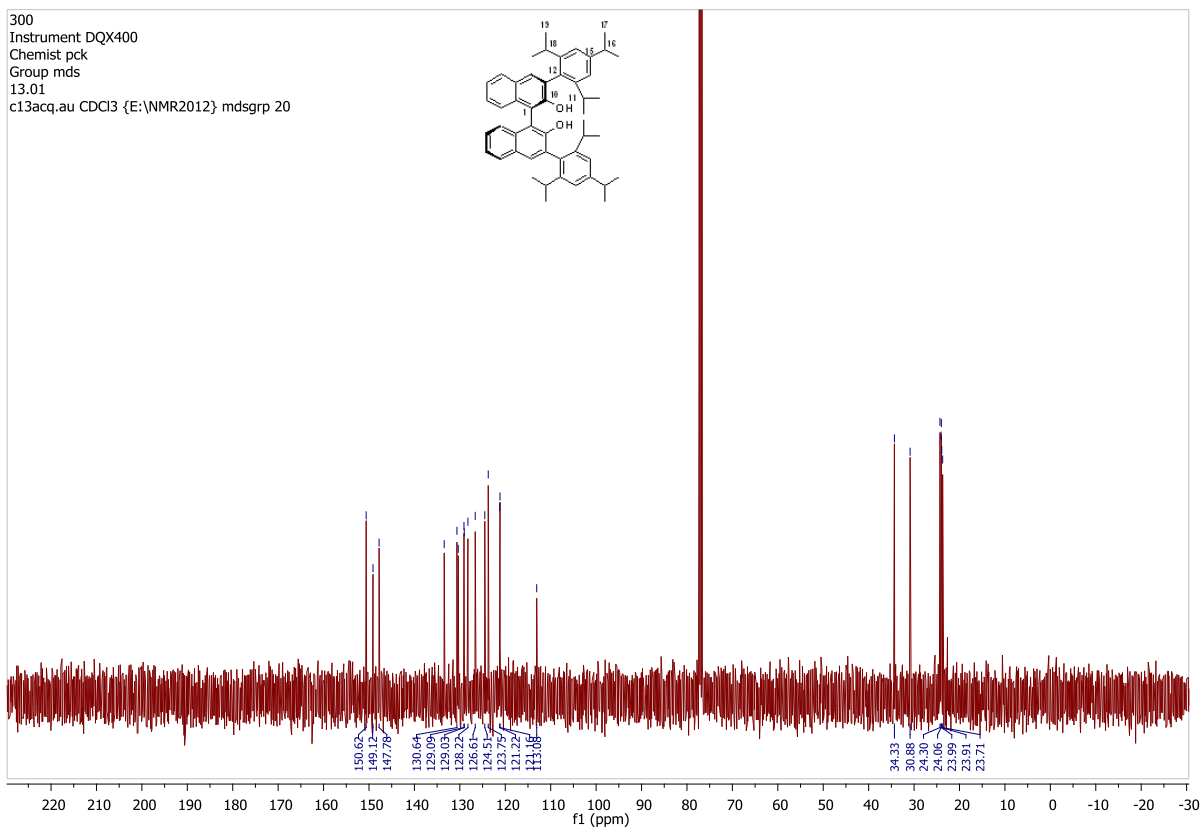

315  
Instrument AVC500  
Group MDS  
7619 Peter Knipe 23/1/12

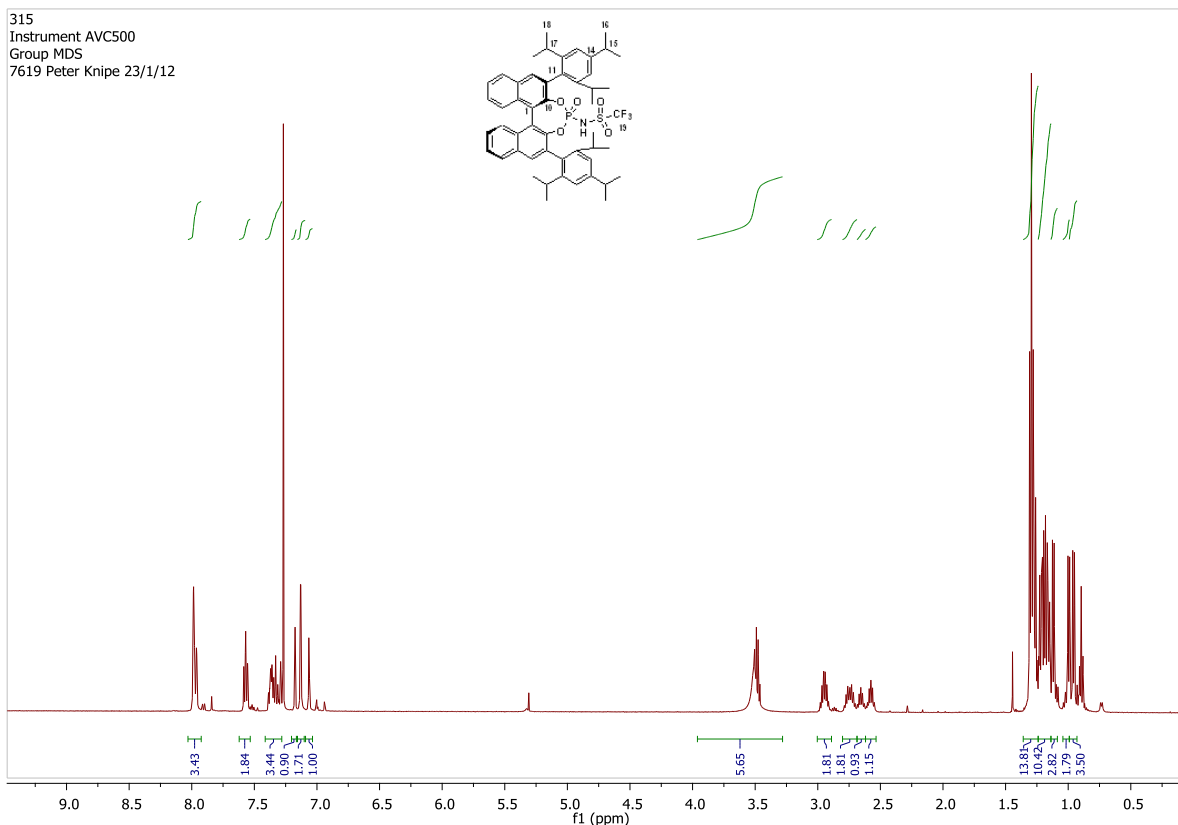

315  
Instrument AVC500  
Group MDS  
7619 Peter Knipe 23/1/12

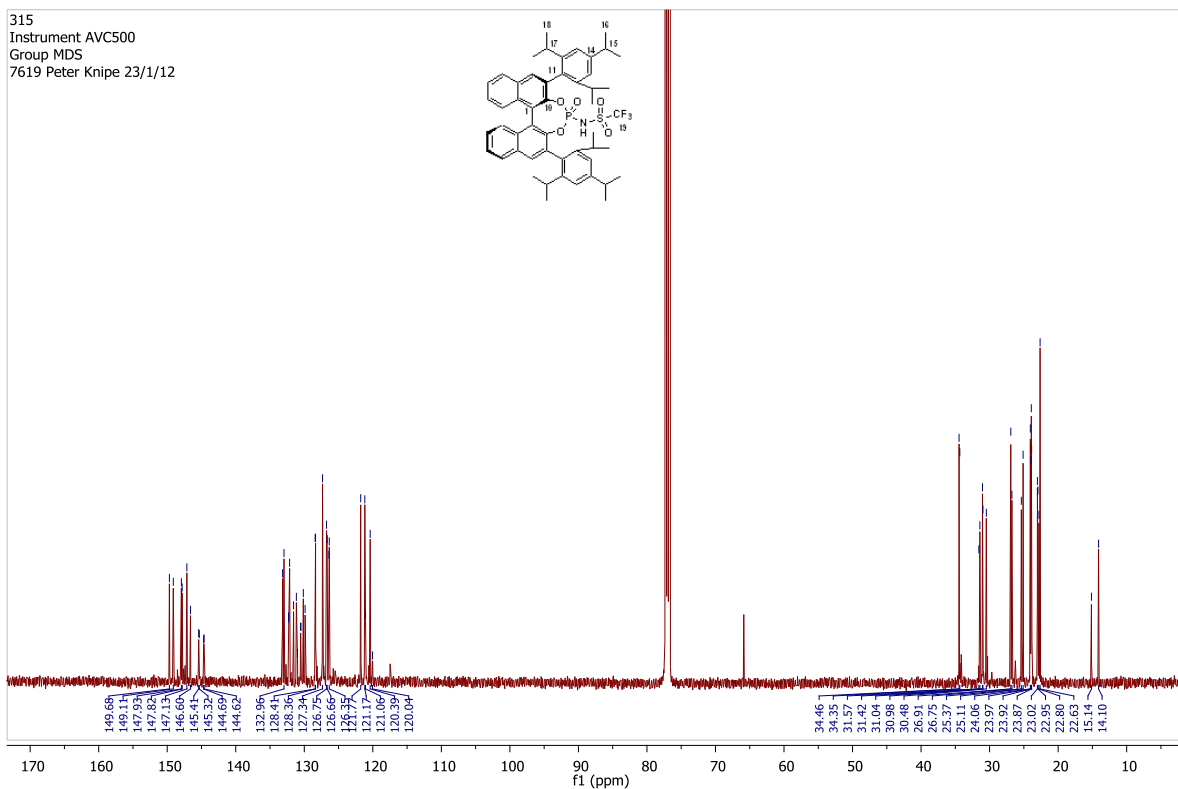

315  
 AVB500 19F{1H} TFI probe PETER KNIPE 7619 24/1/12

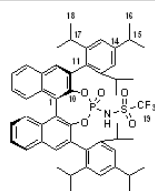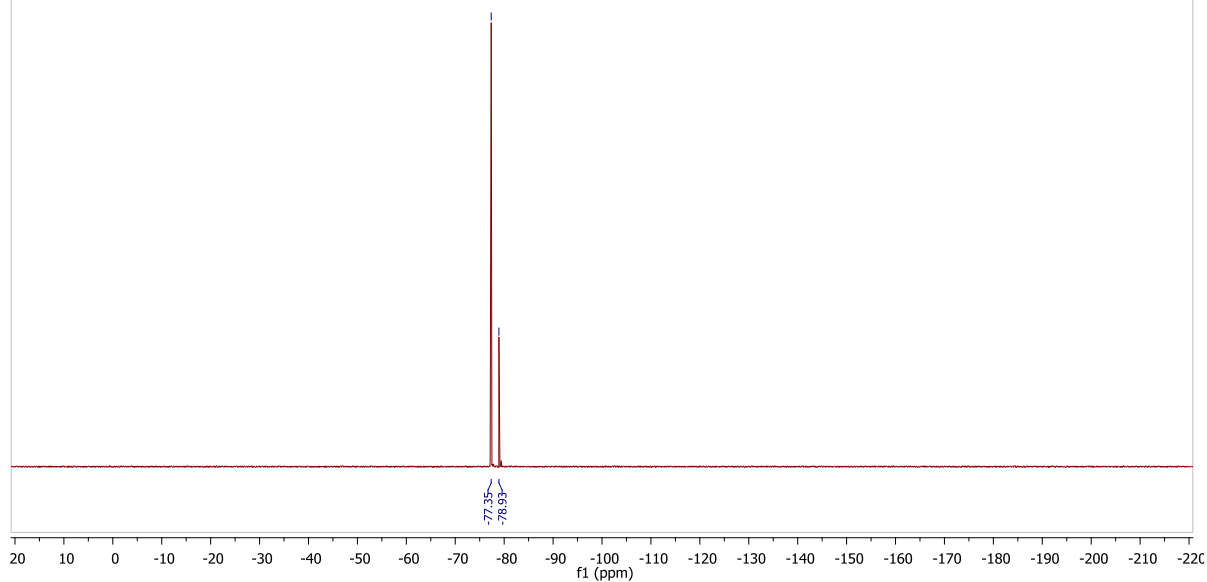

315  
 DRX500 31P{1H} BBO probe PETER KNIPE 7619 25/1/12

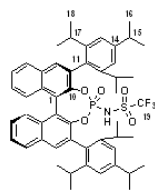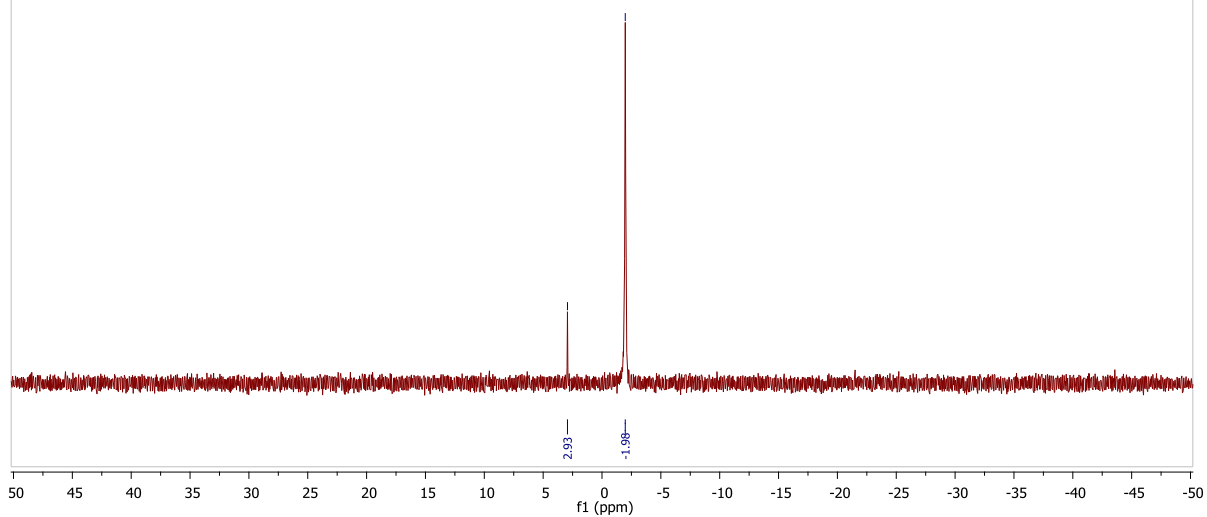

# S11

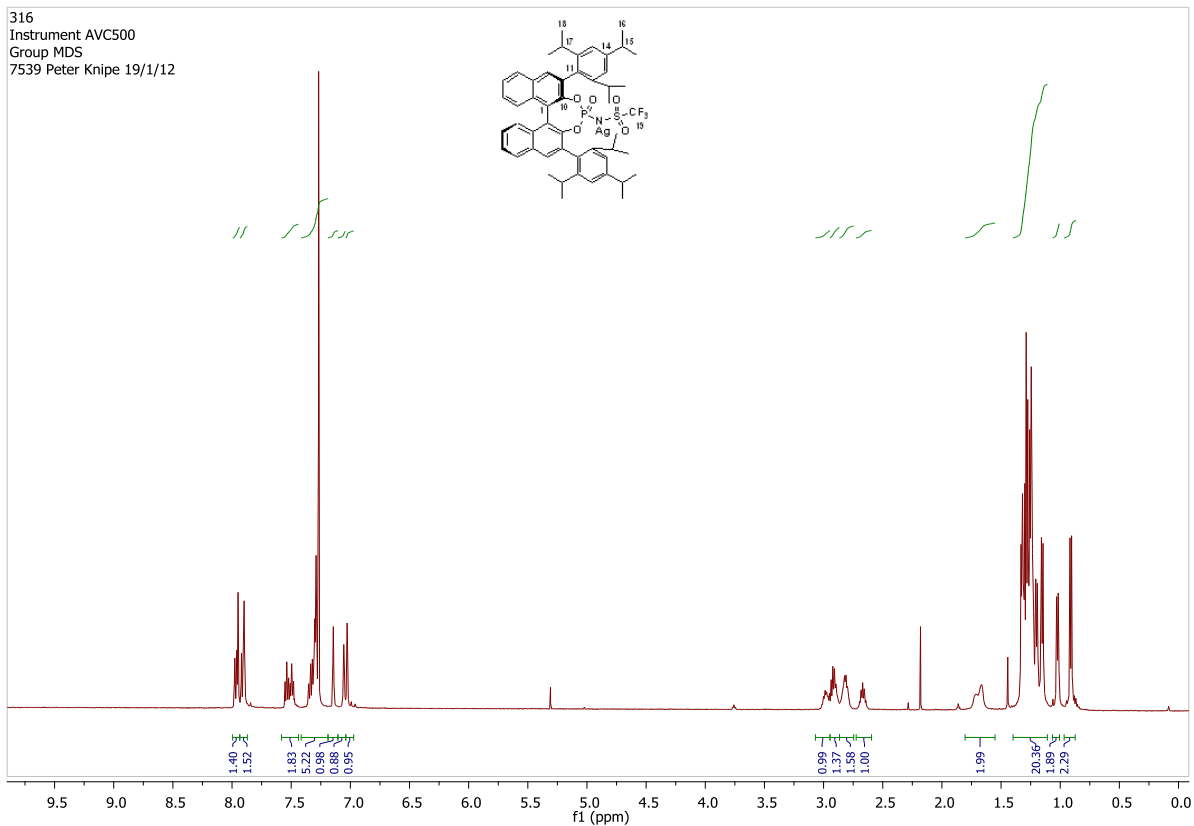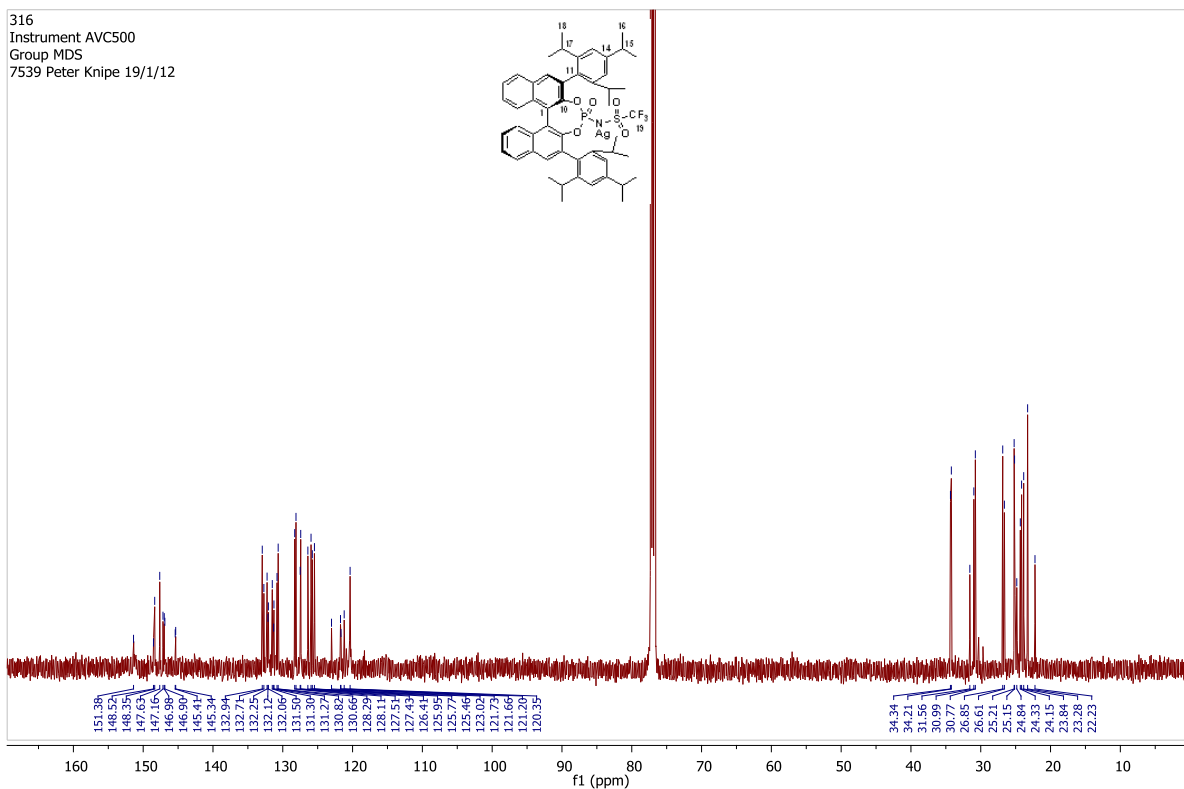

316  
 AVB500 19F{1H} TFI probe  
 PETER KNIPE 7534 19/1/12

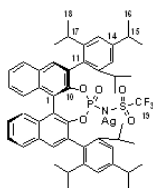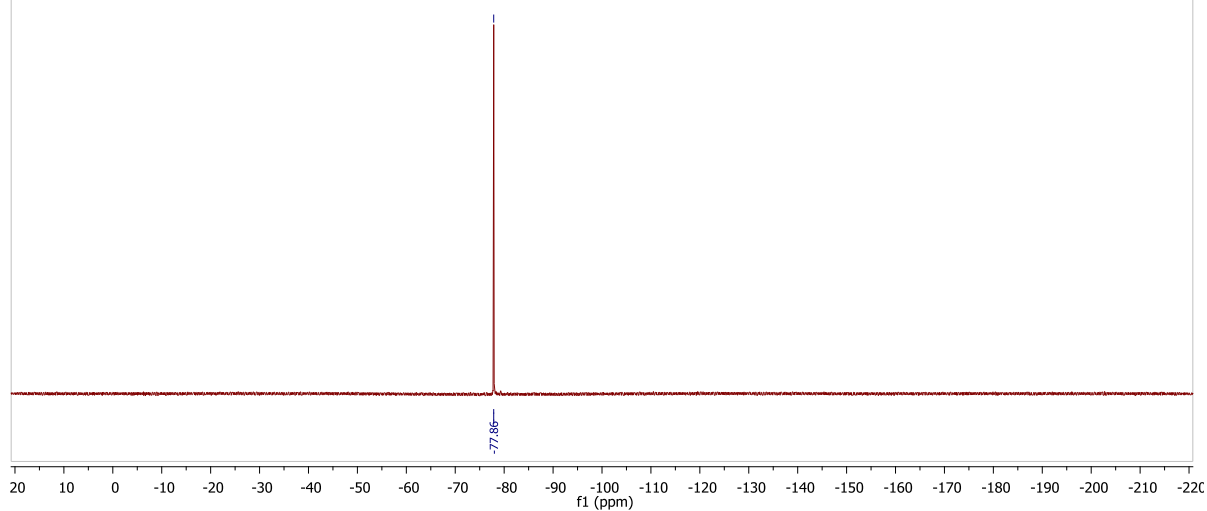

316  
 DRX500 31P{1H} BBO probe PETER KNIPE 7534 19/1/12

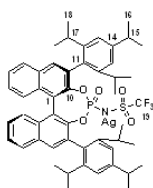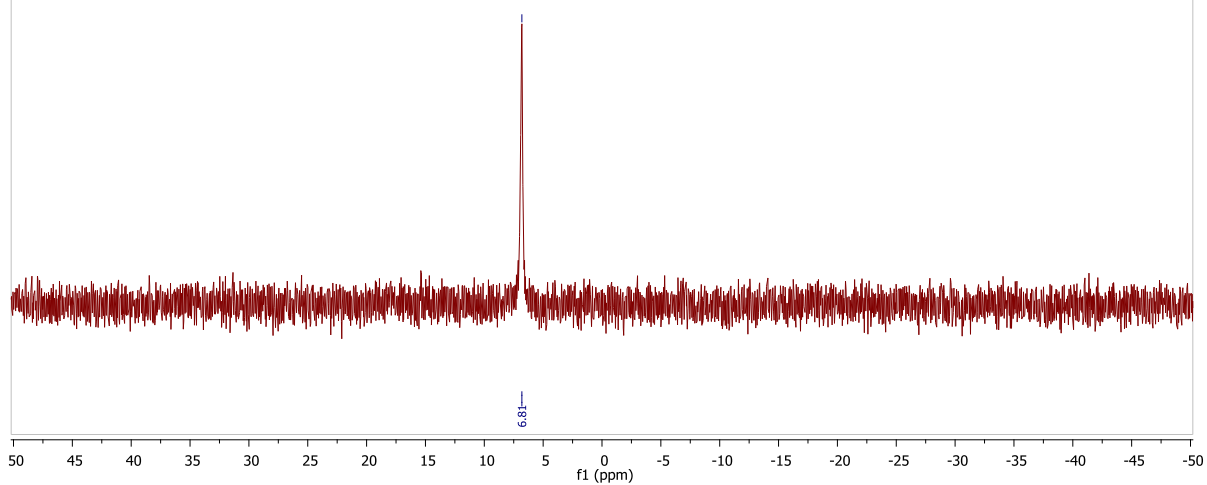

### 4.3 Dihydroquinolones

2



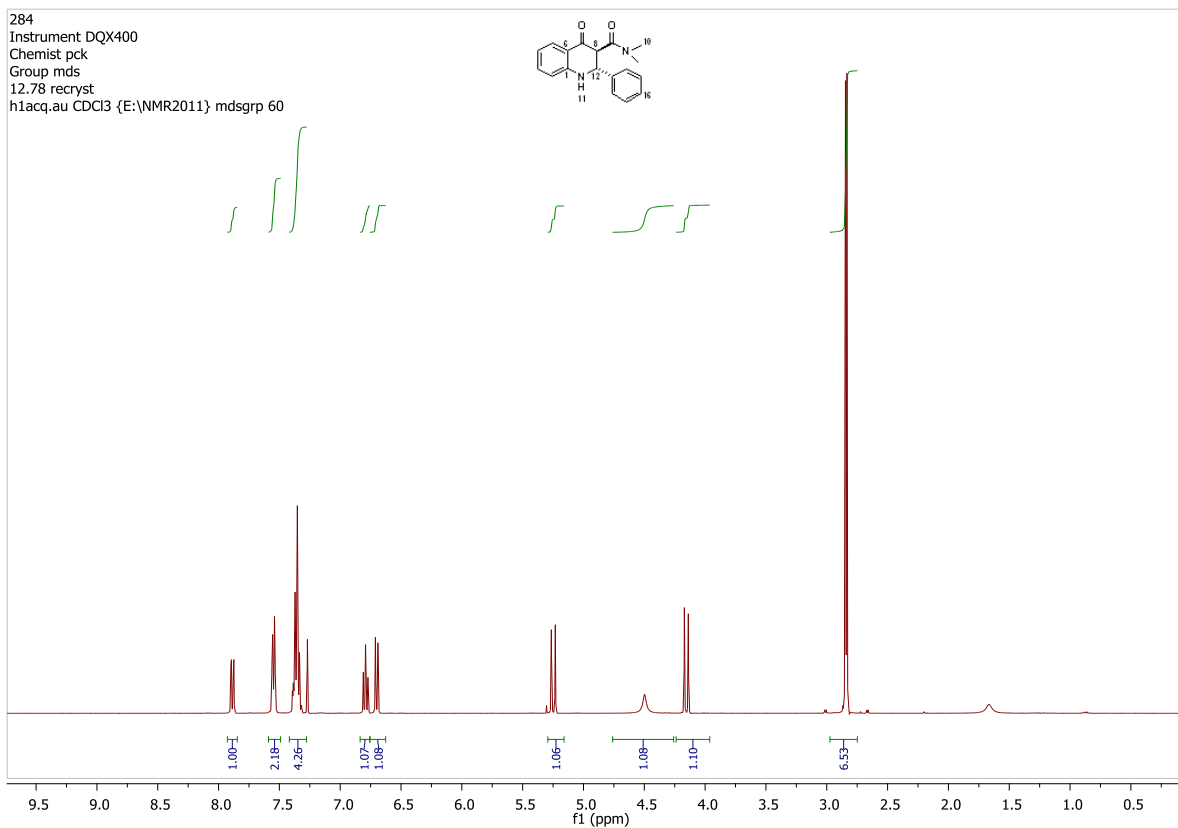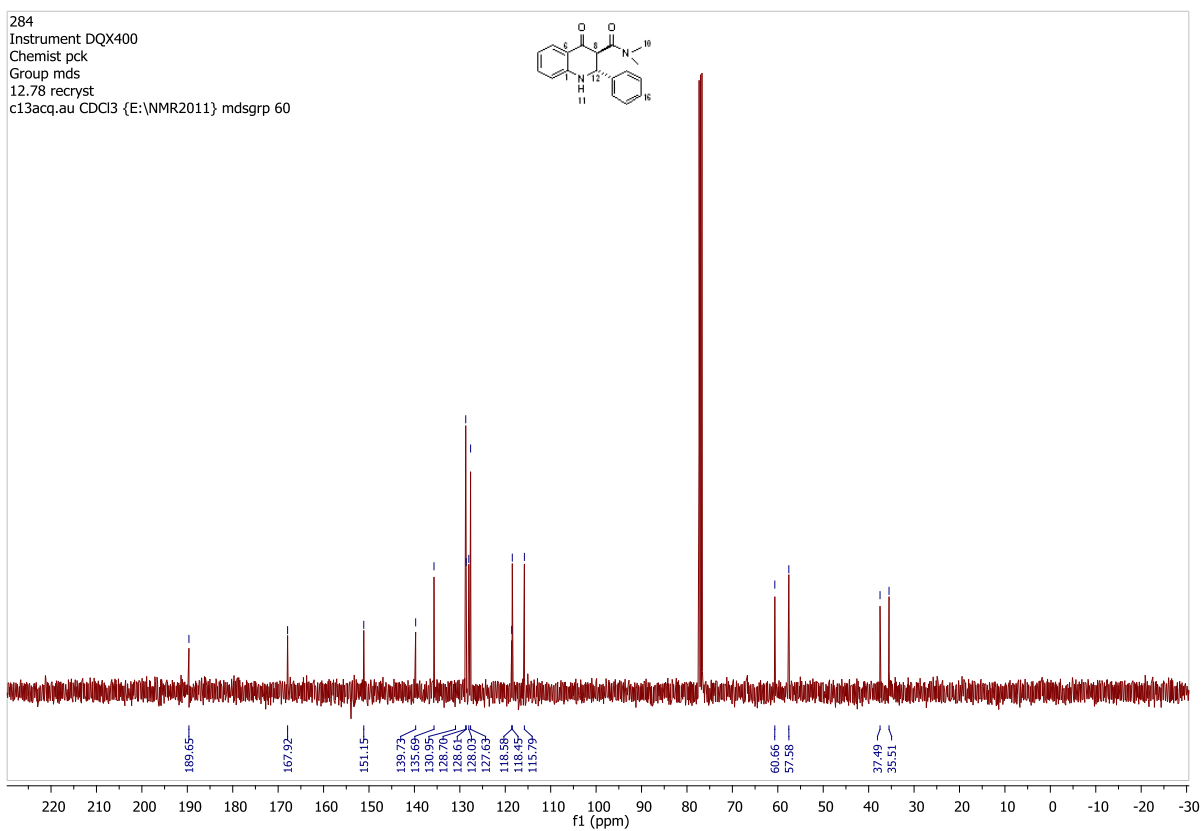

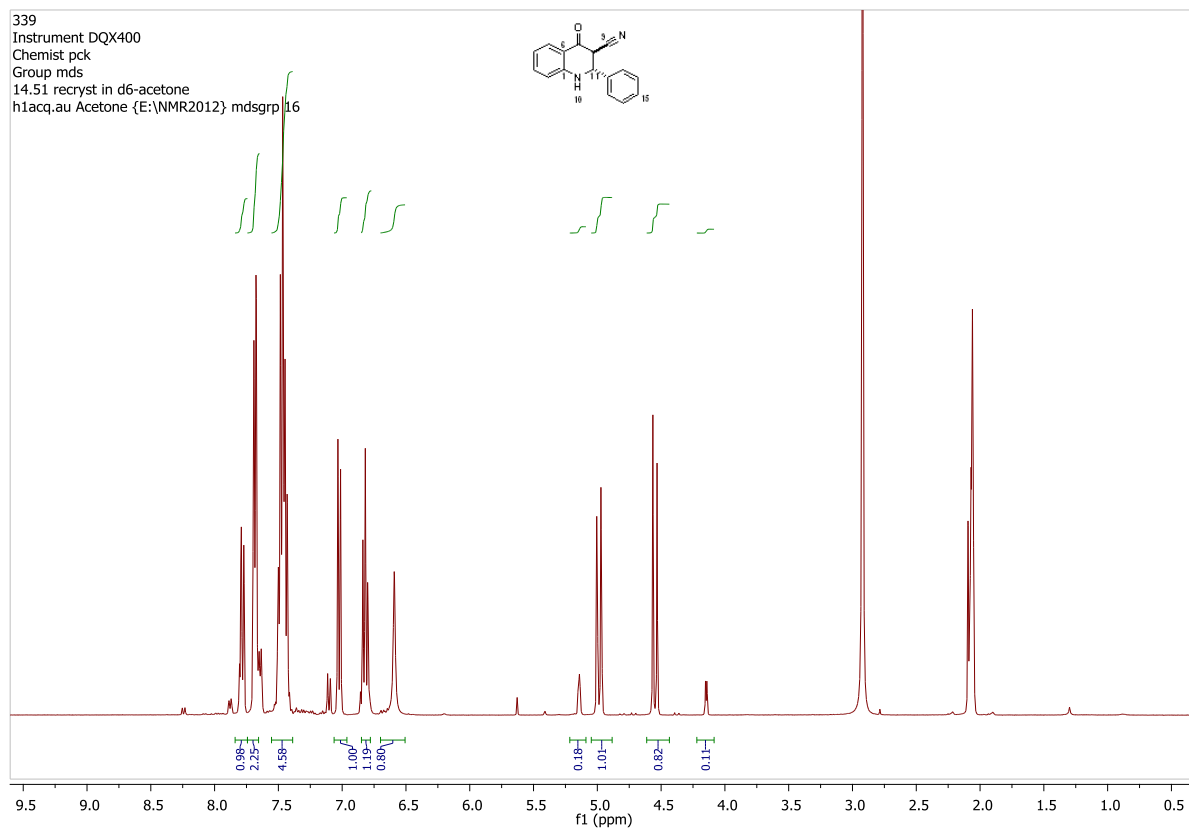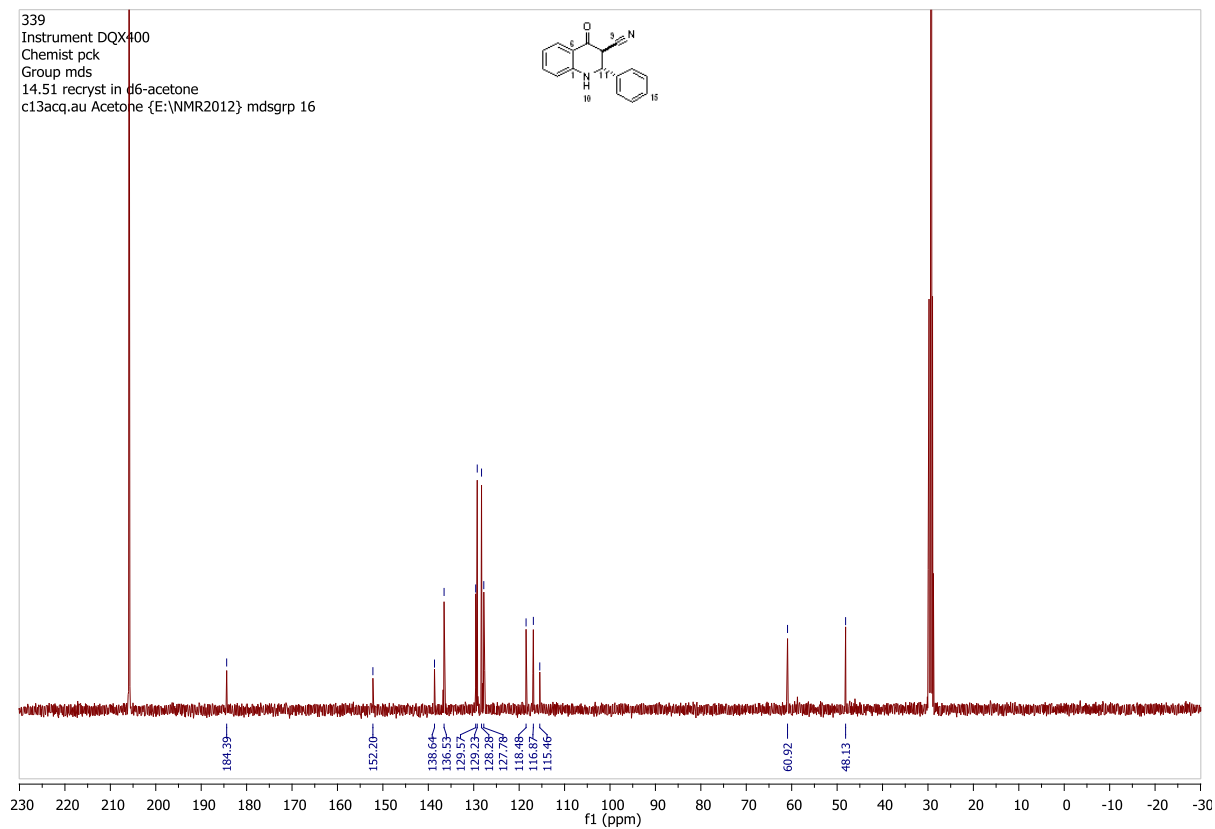

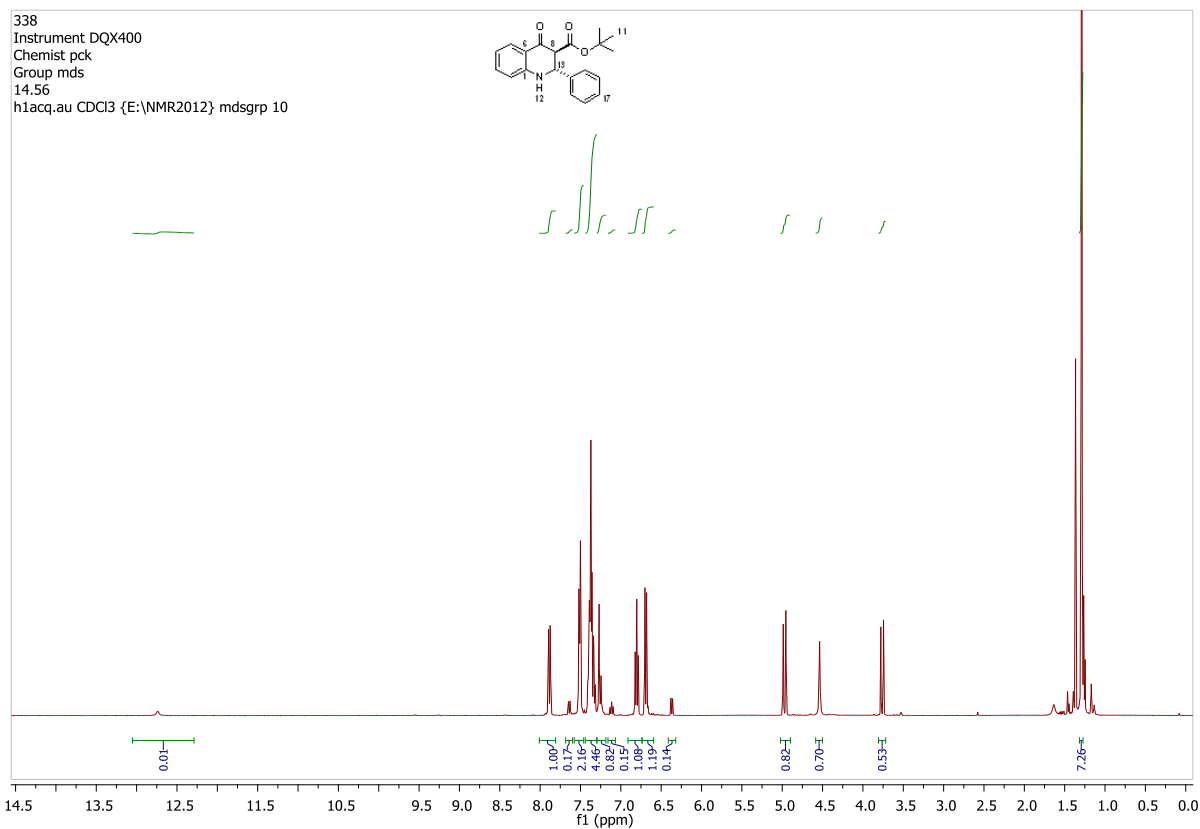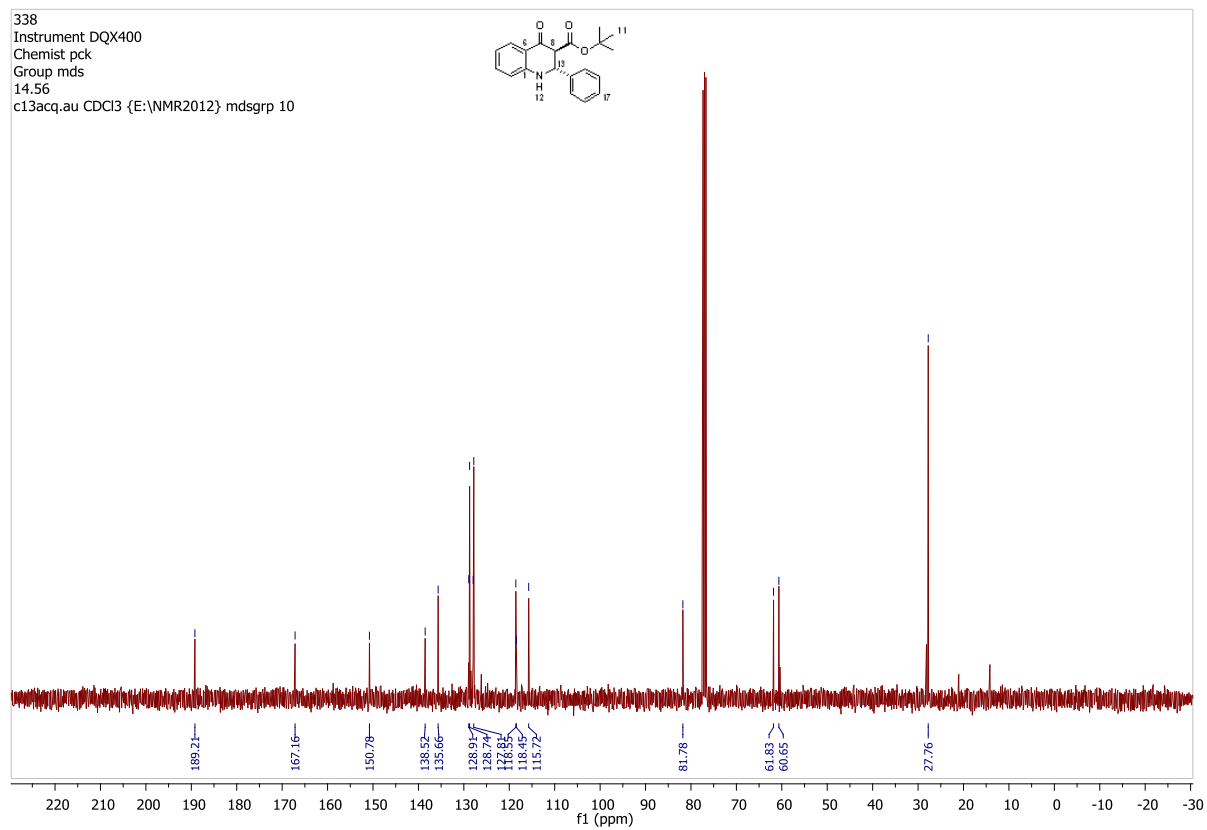

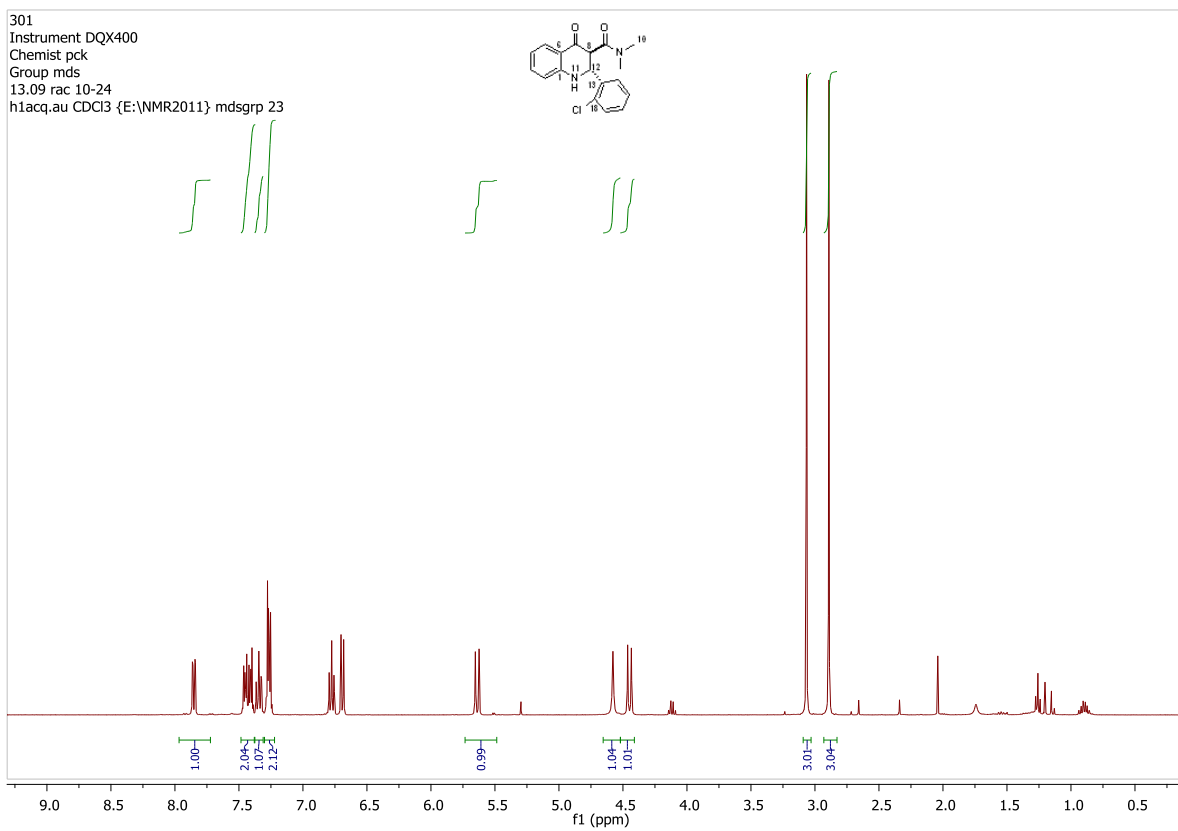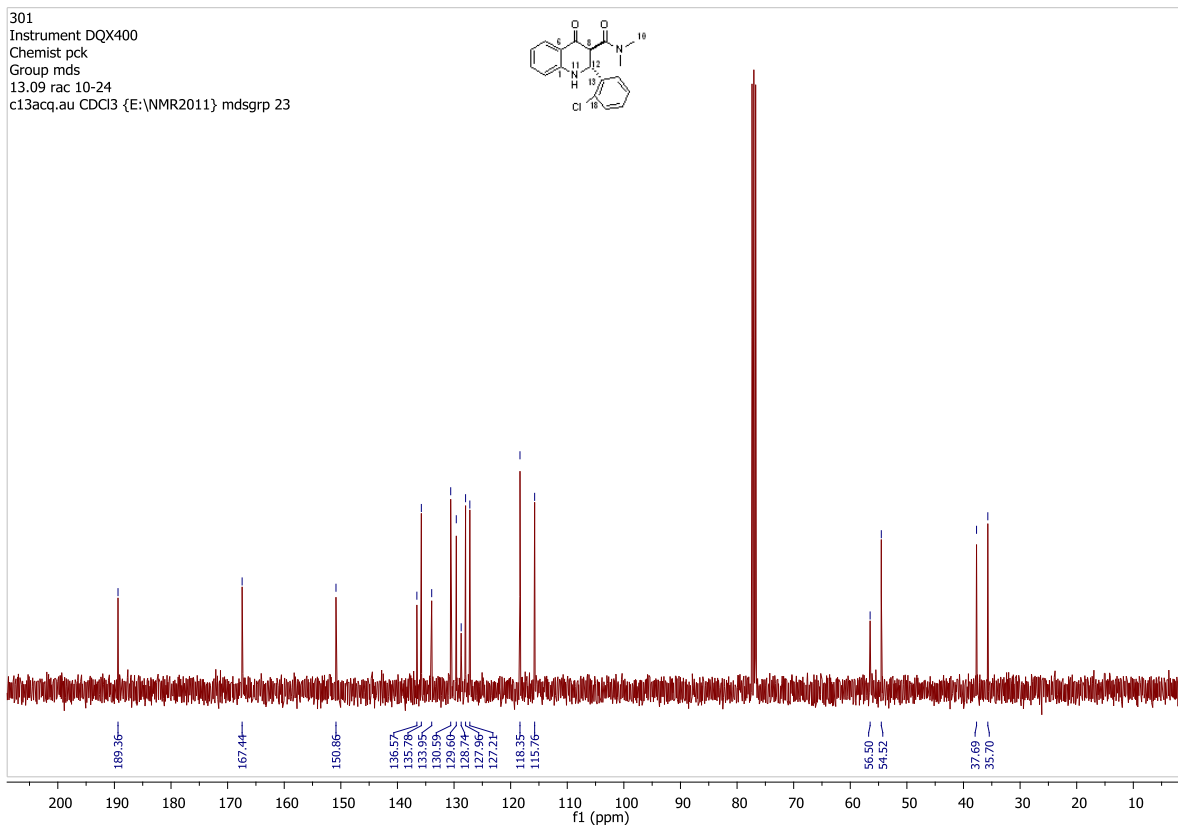

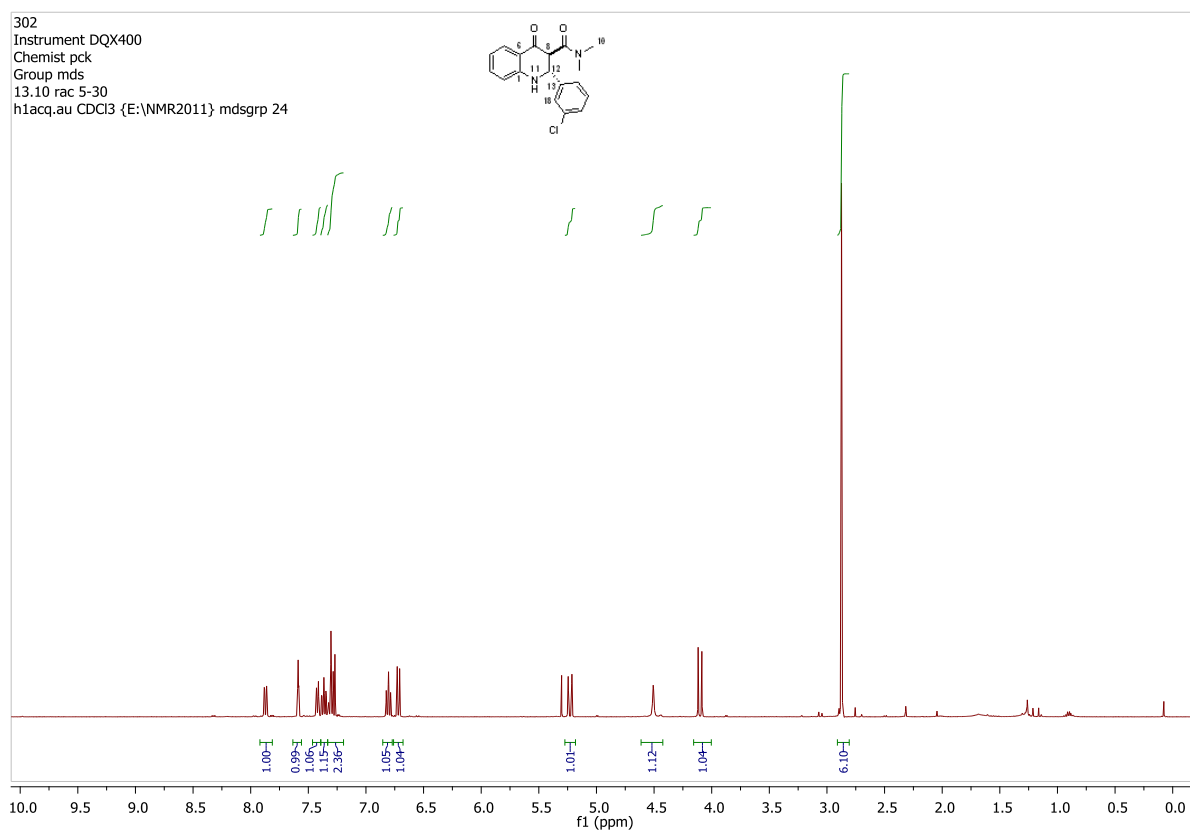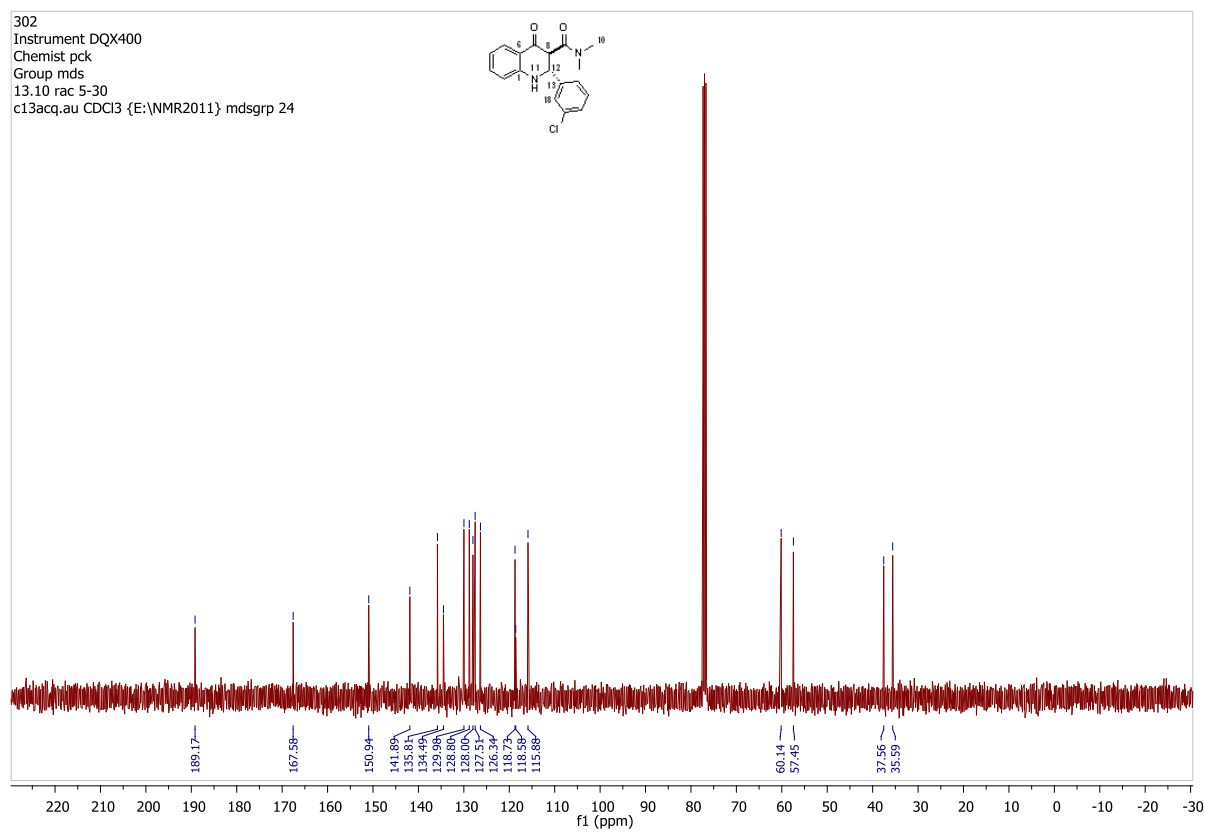

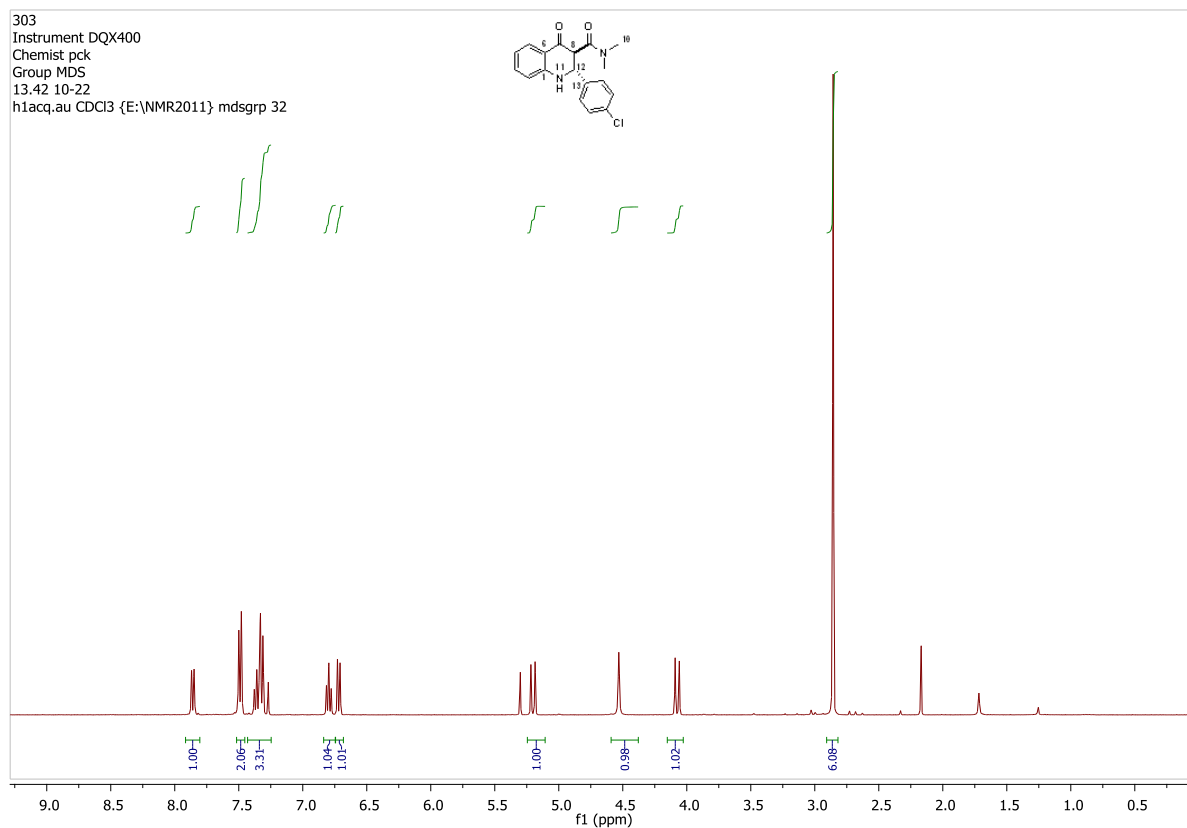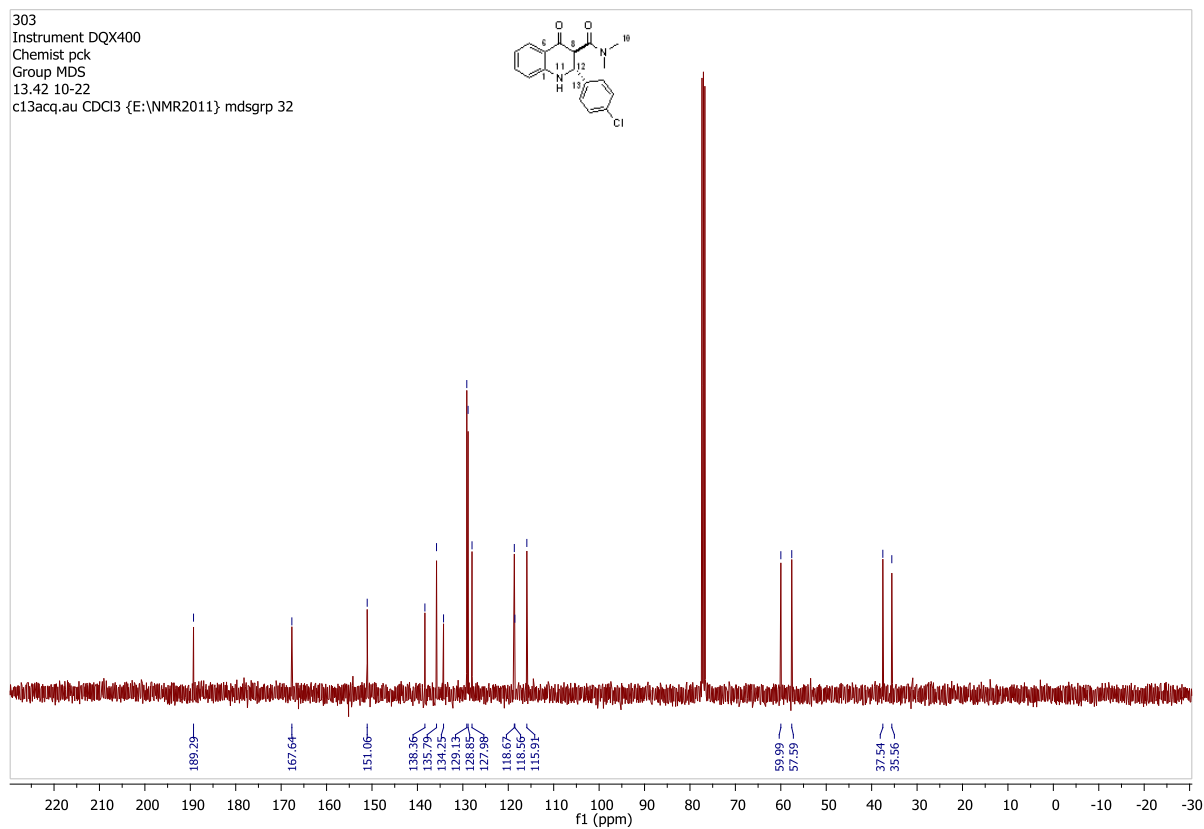

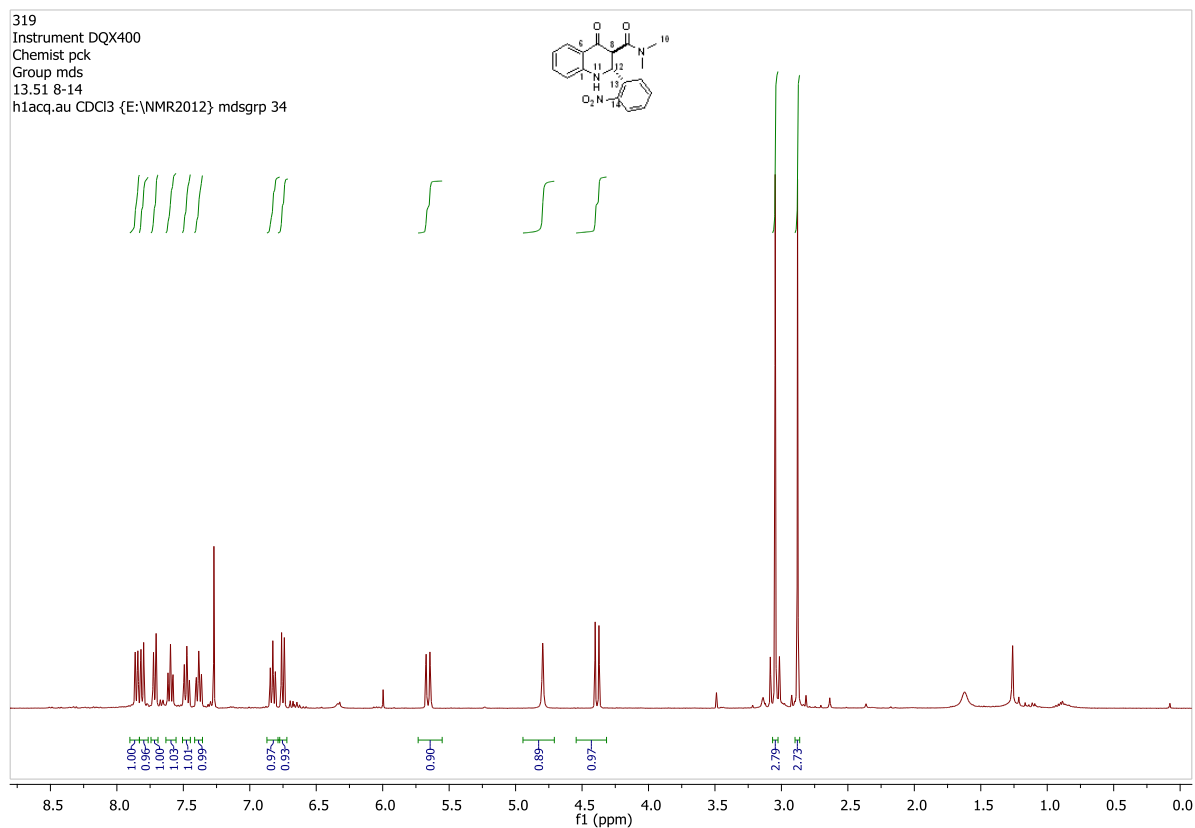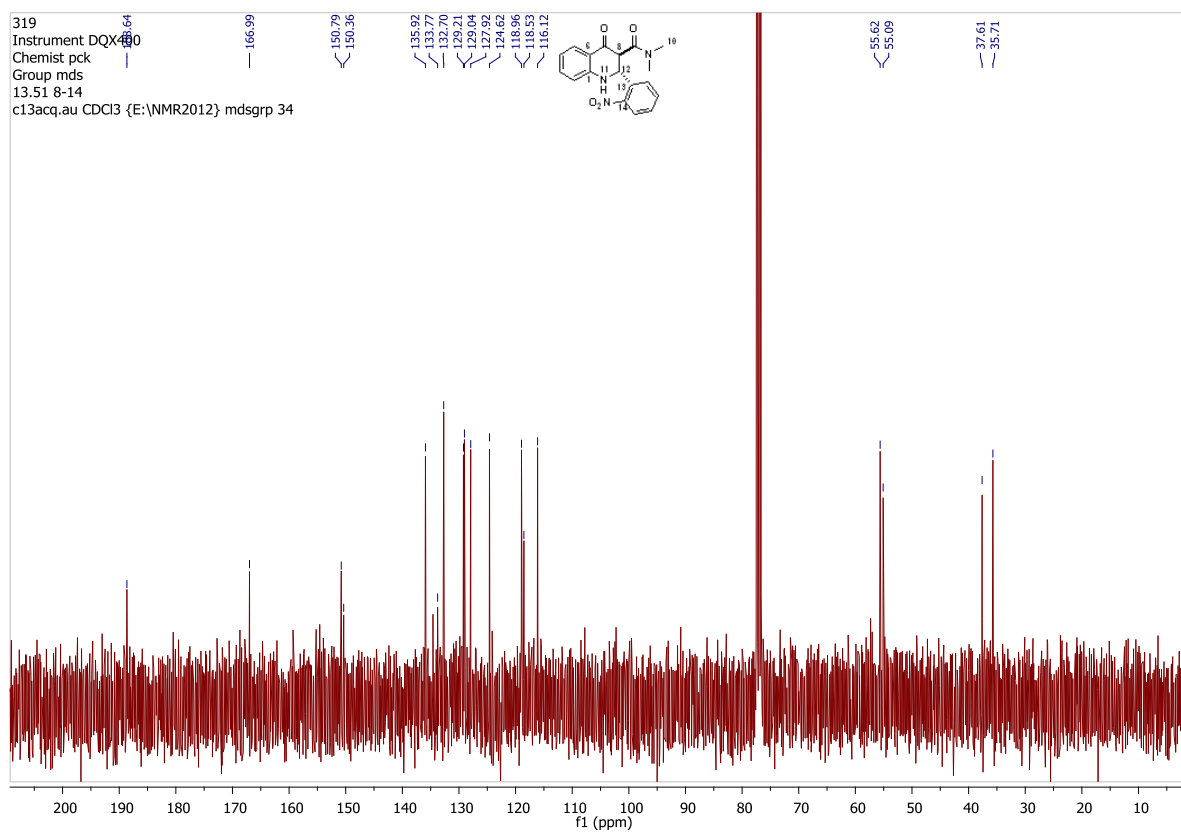

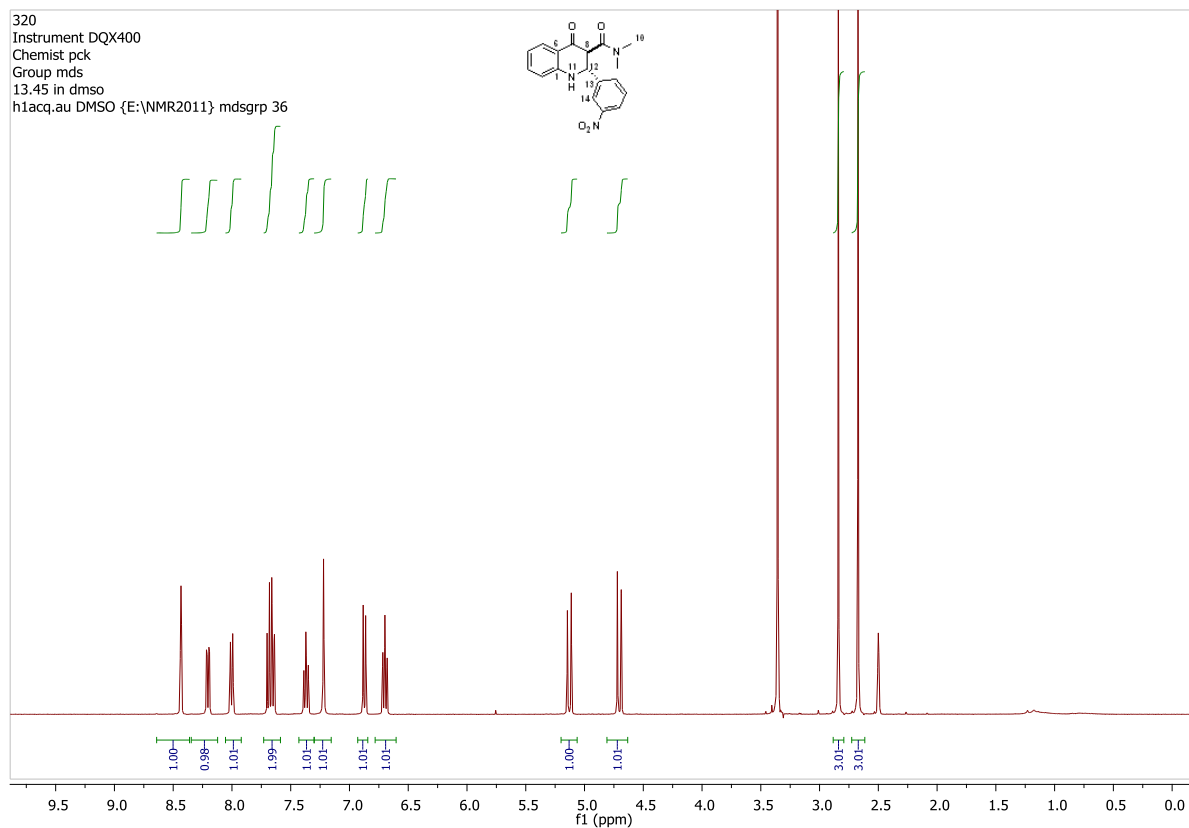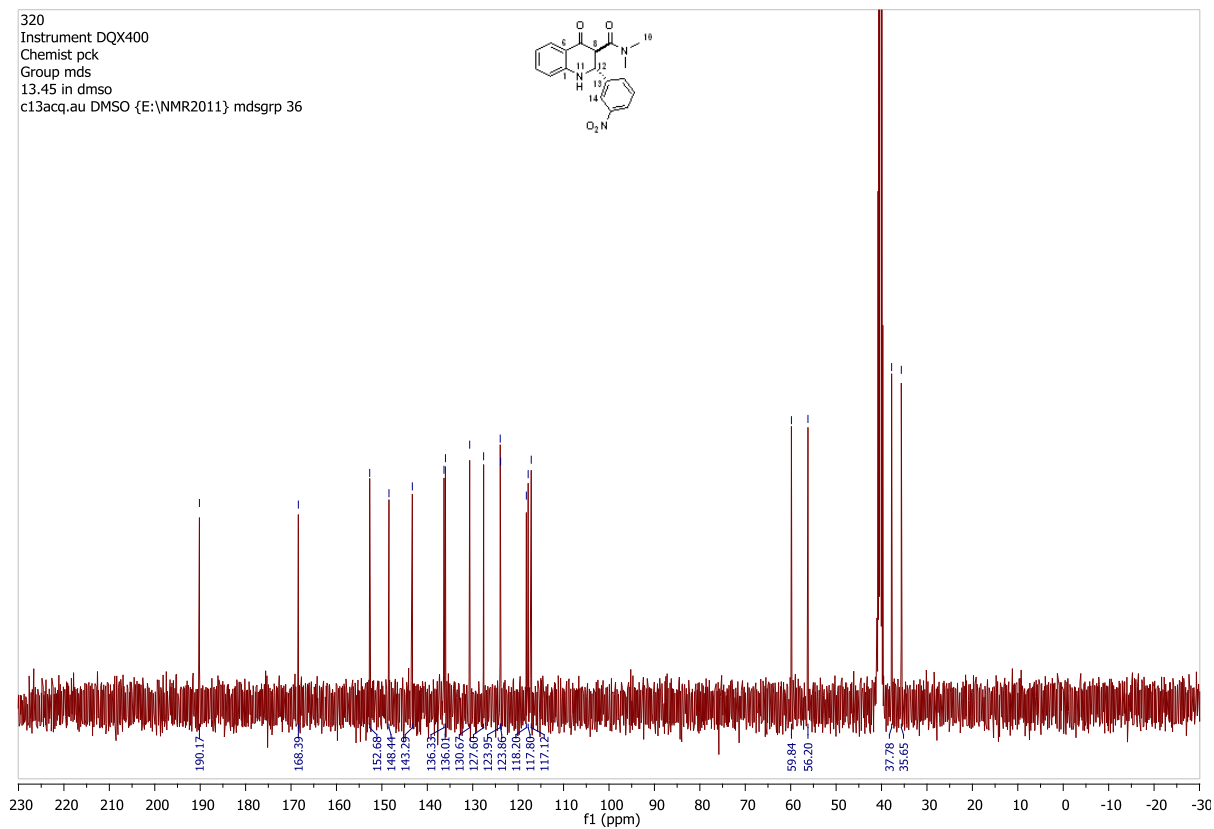



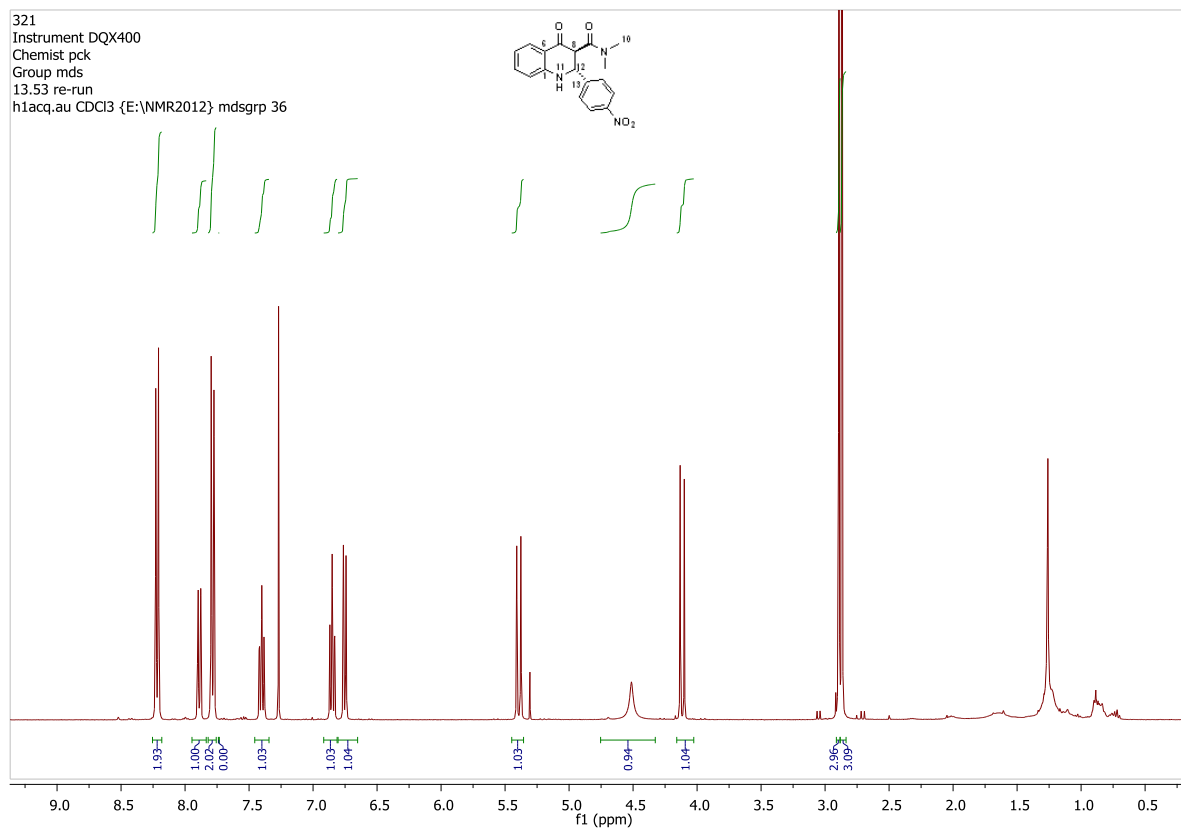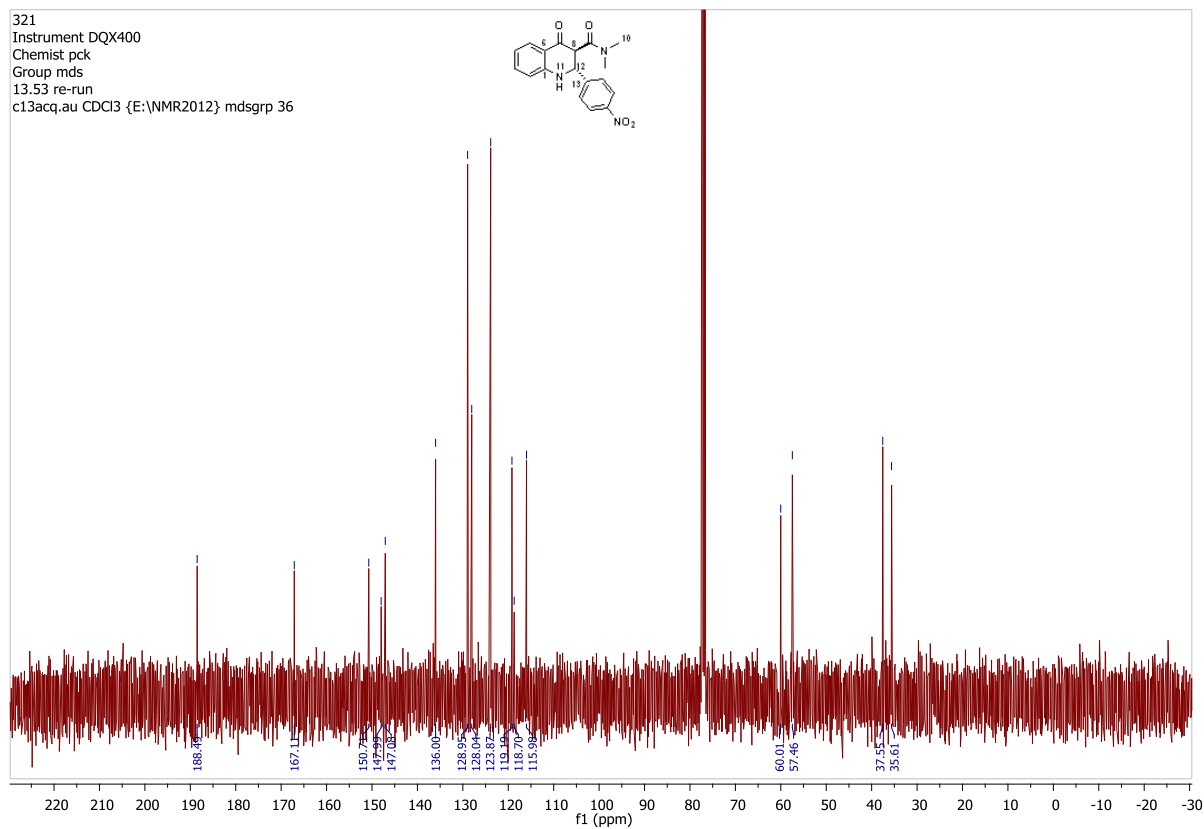

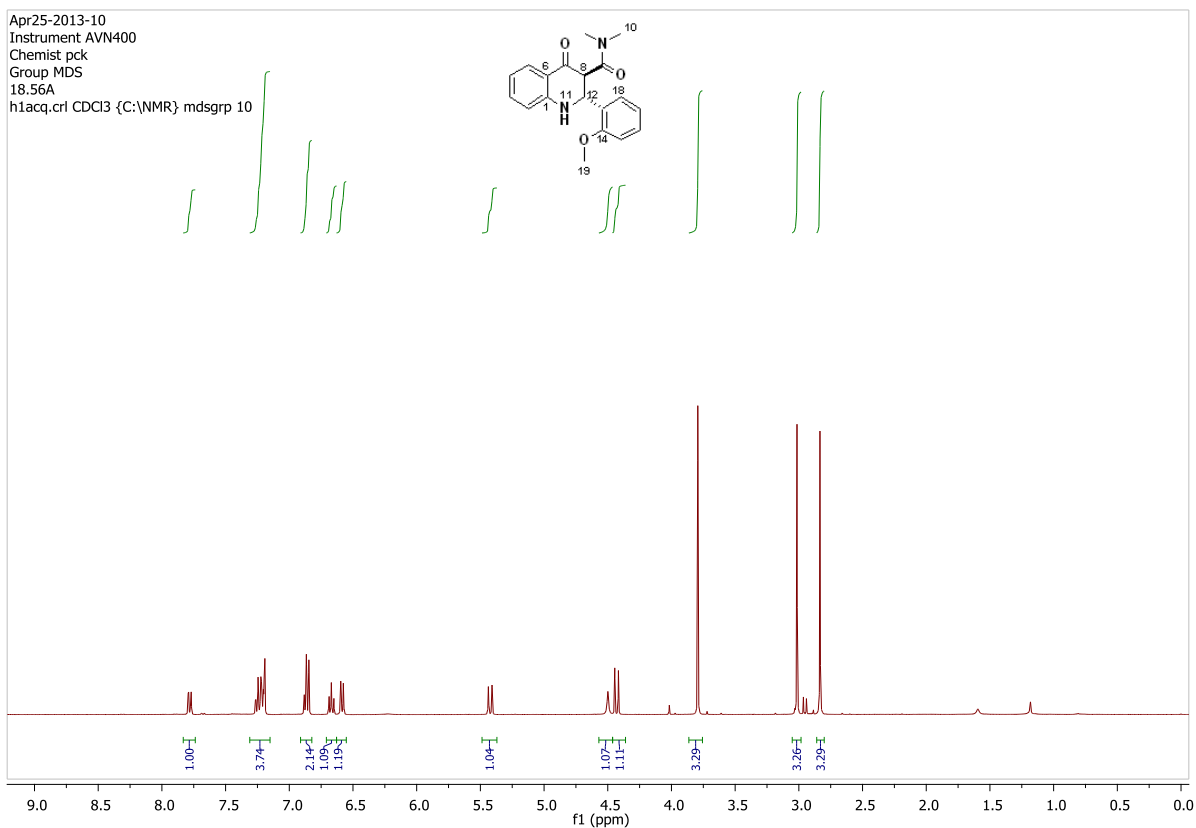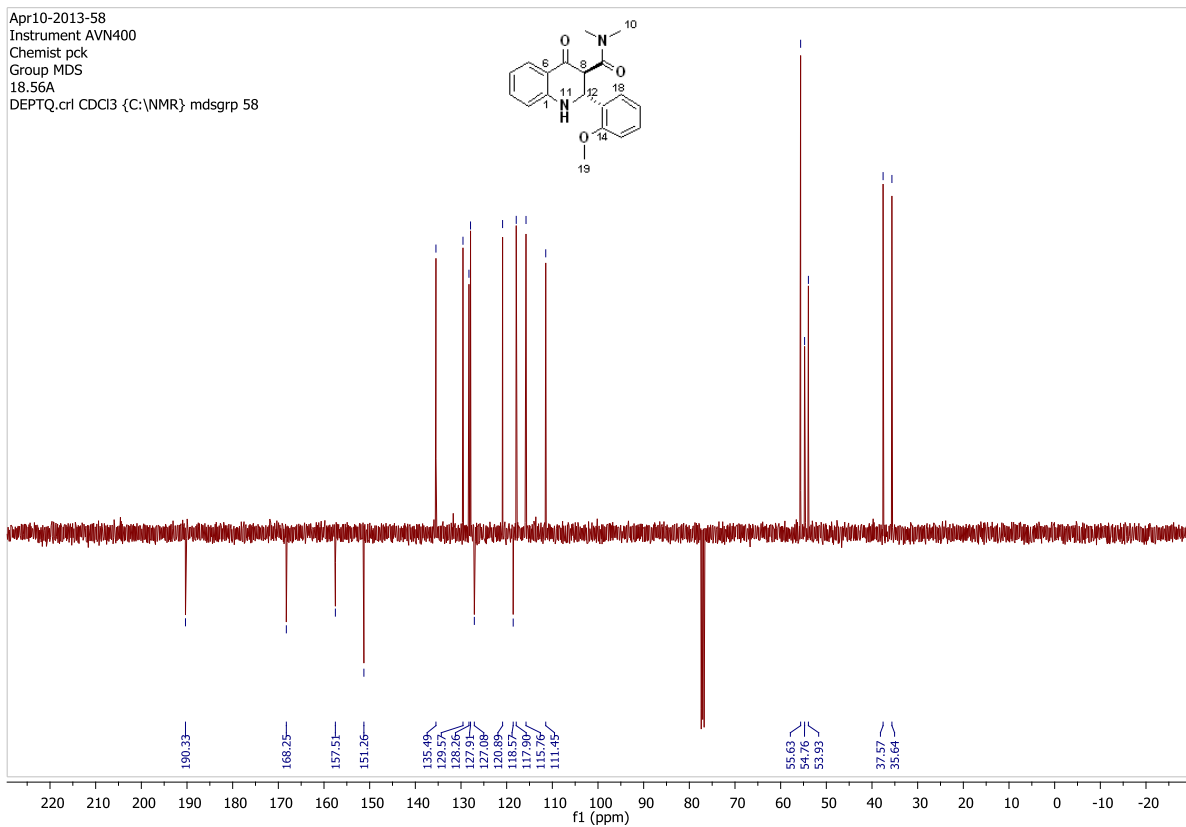

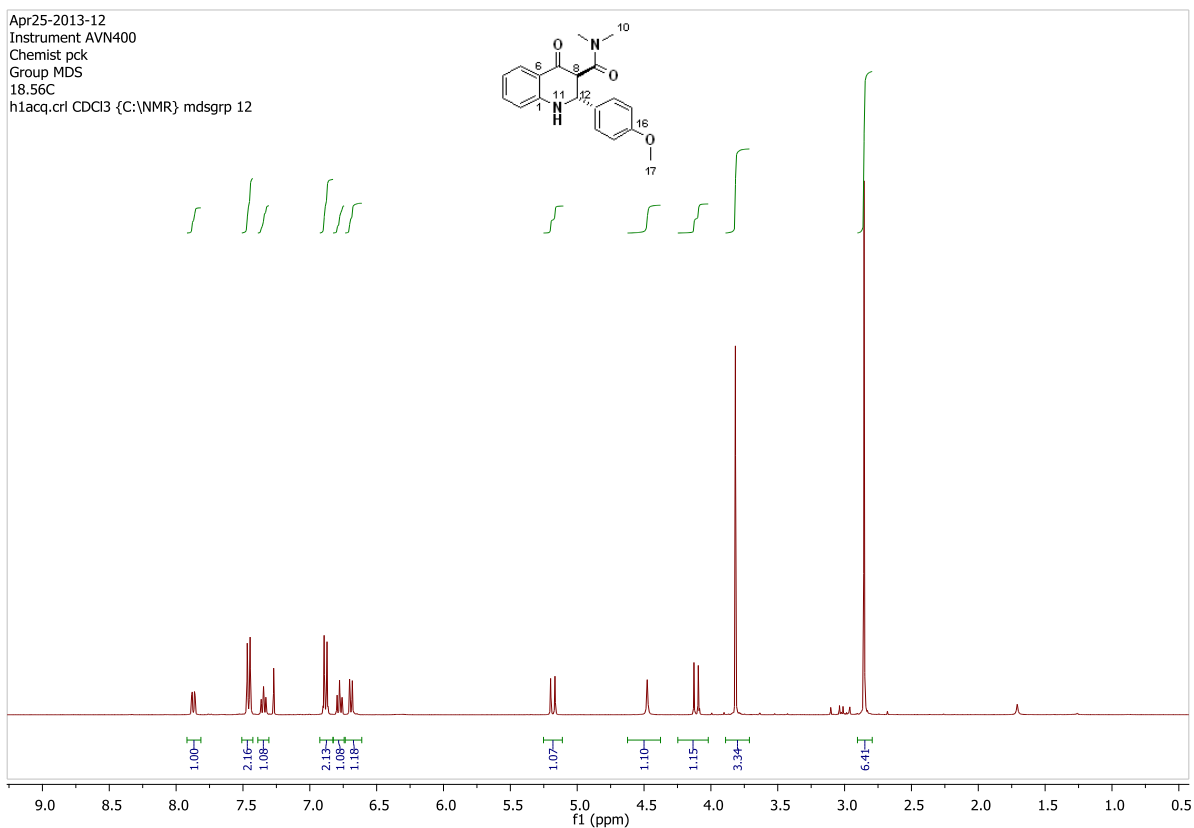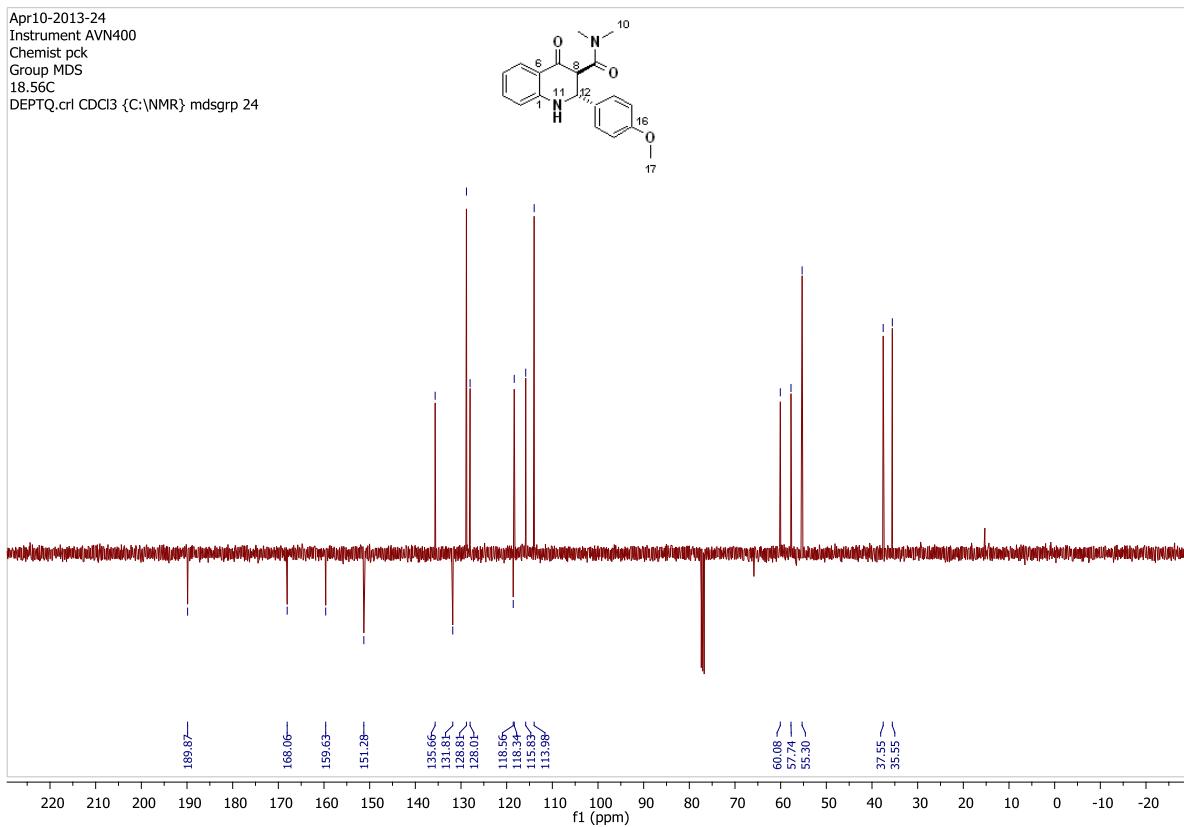

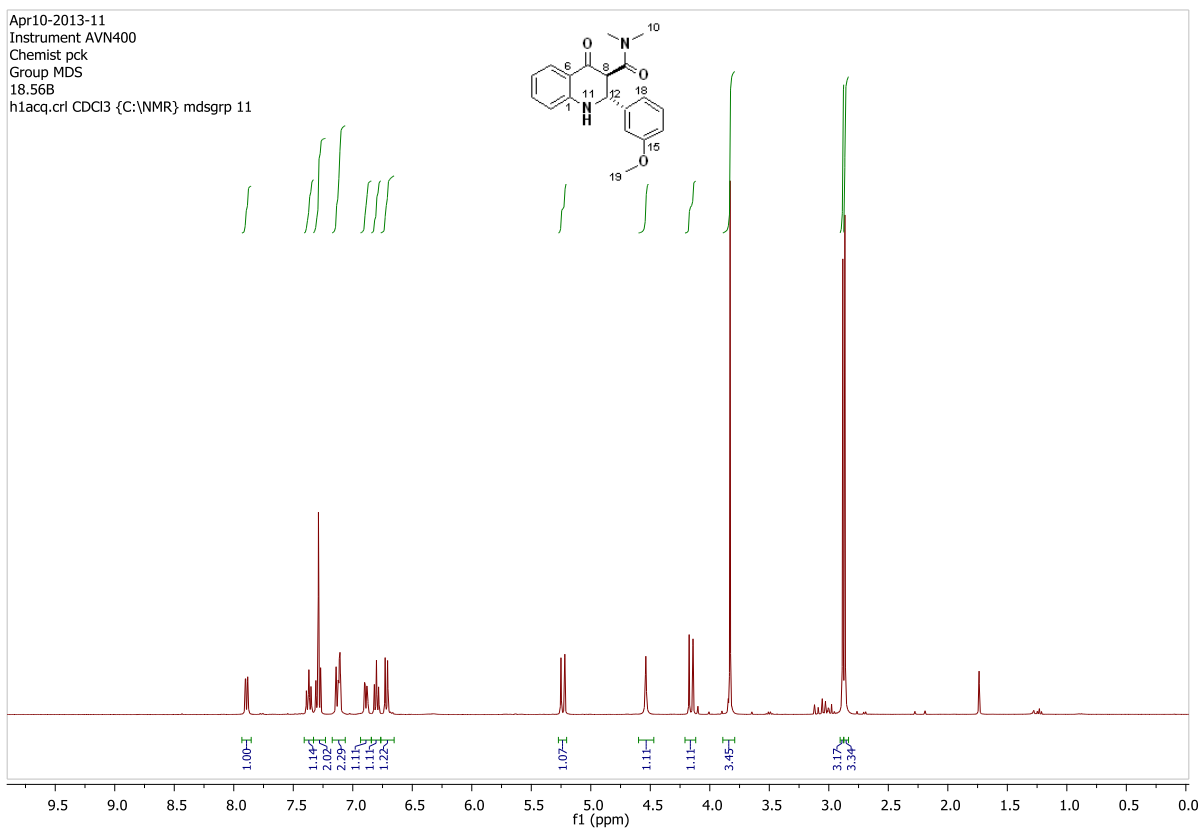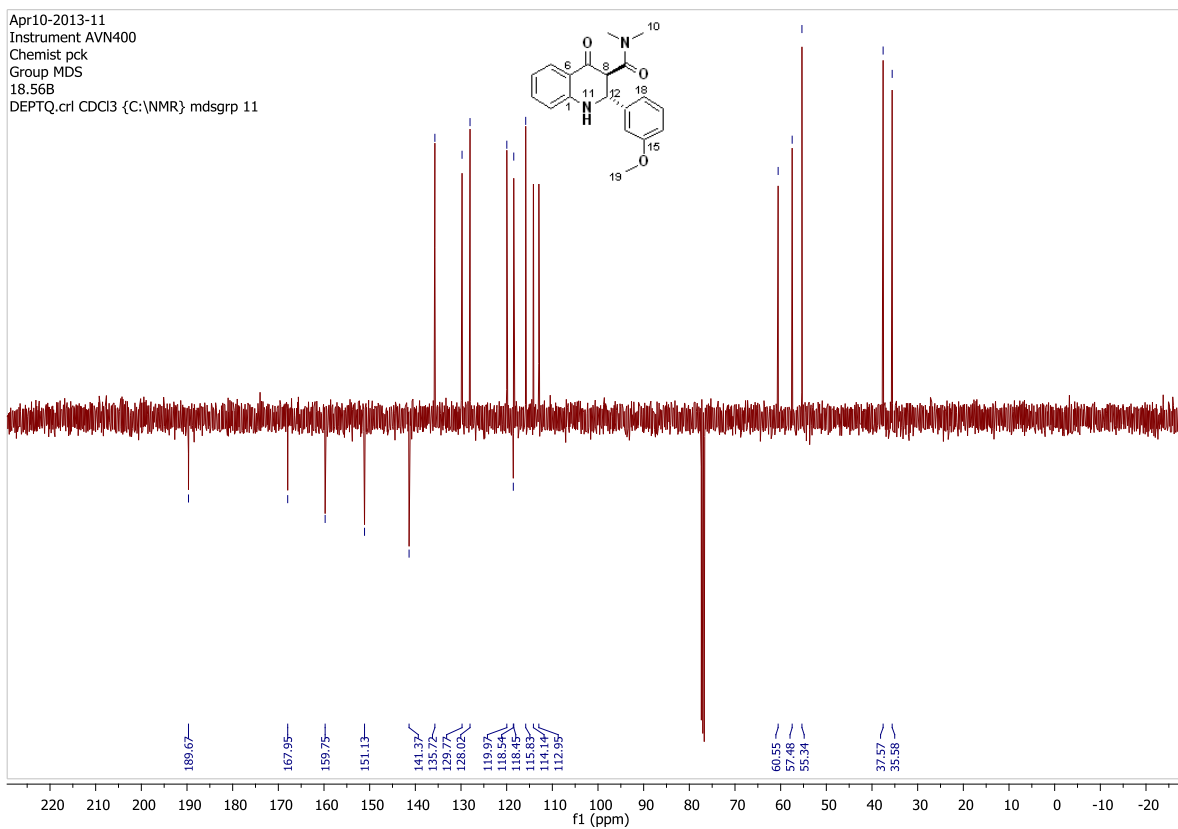

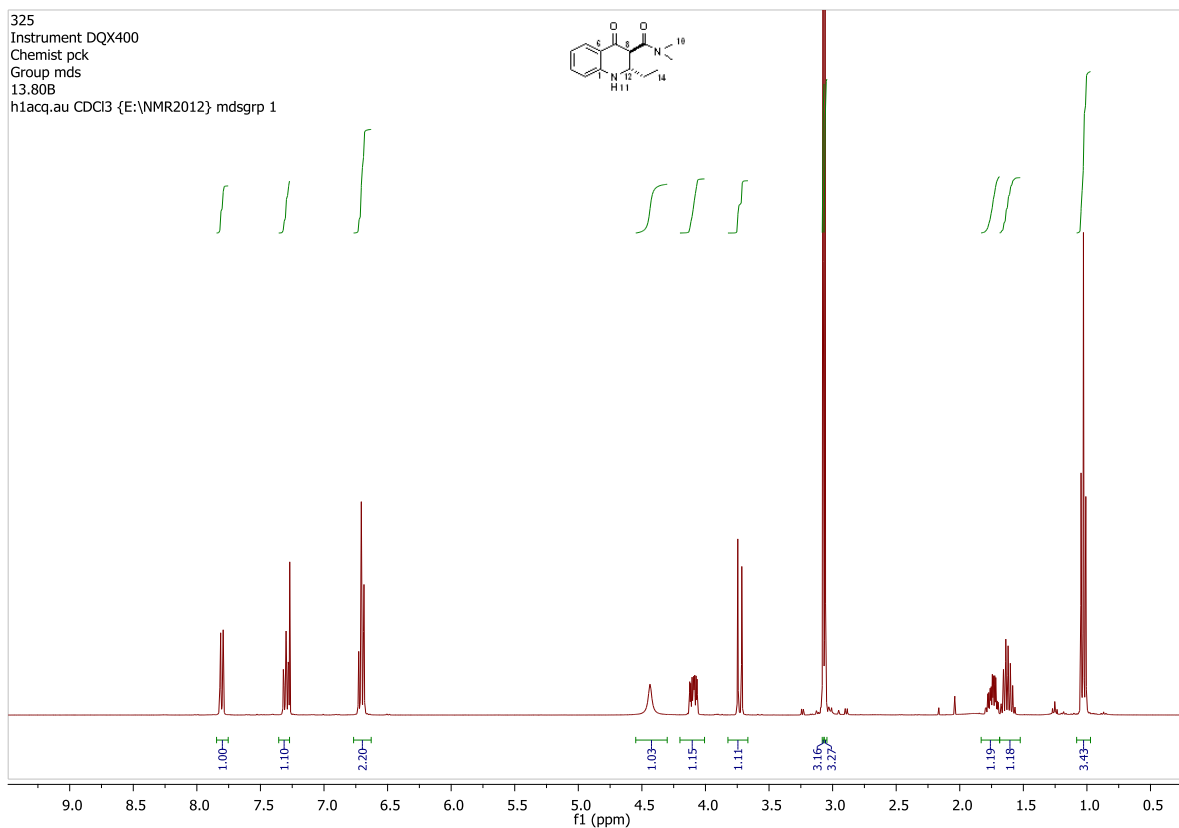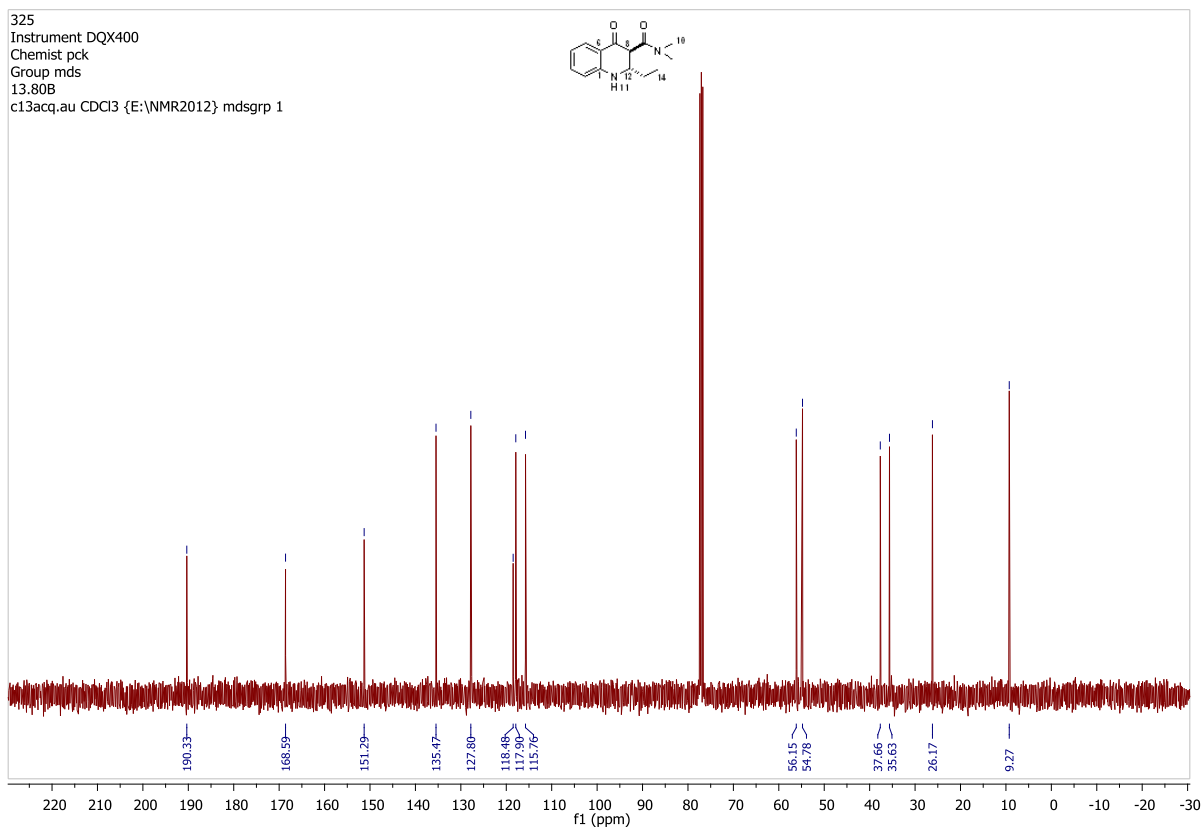

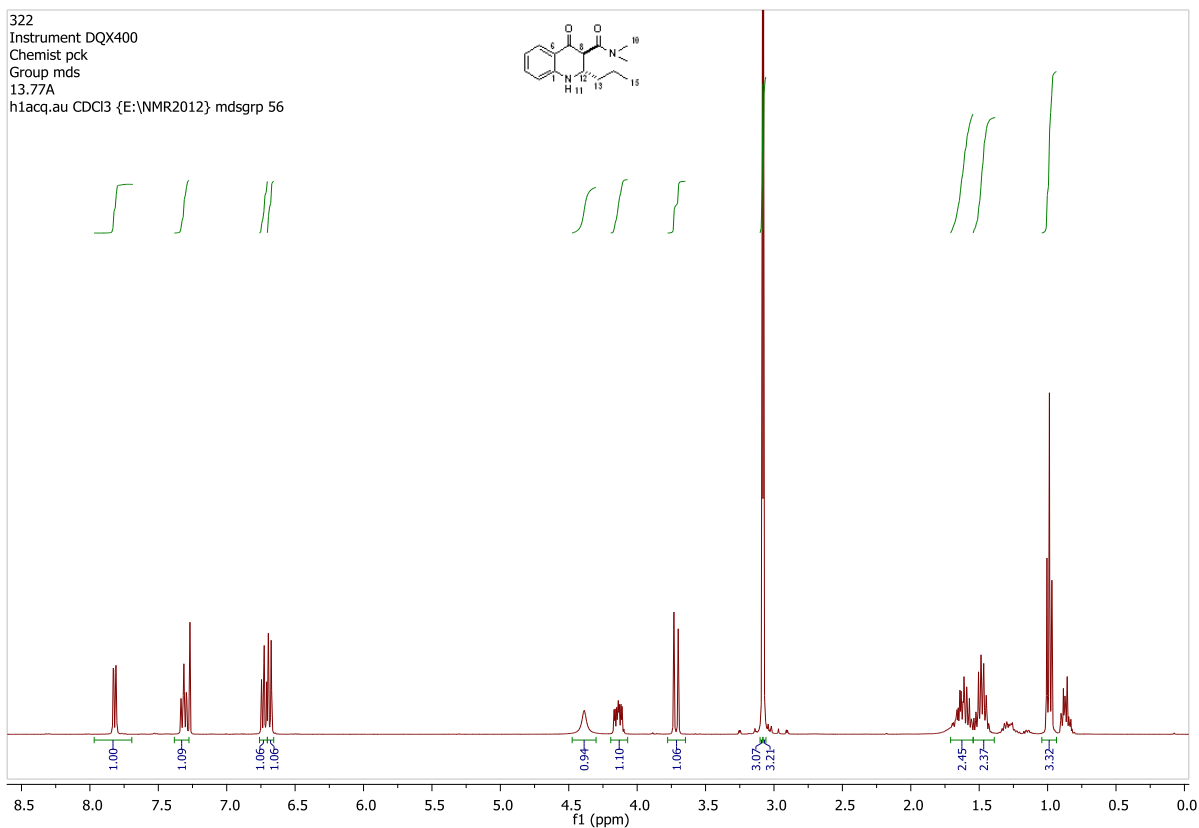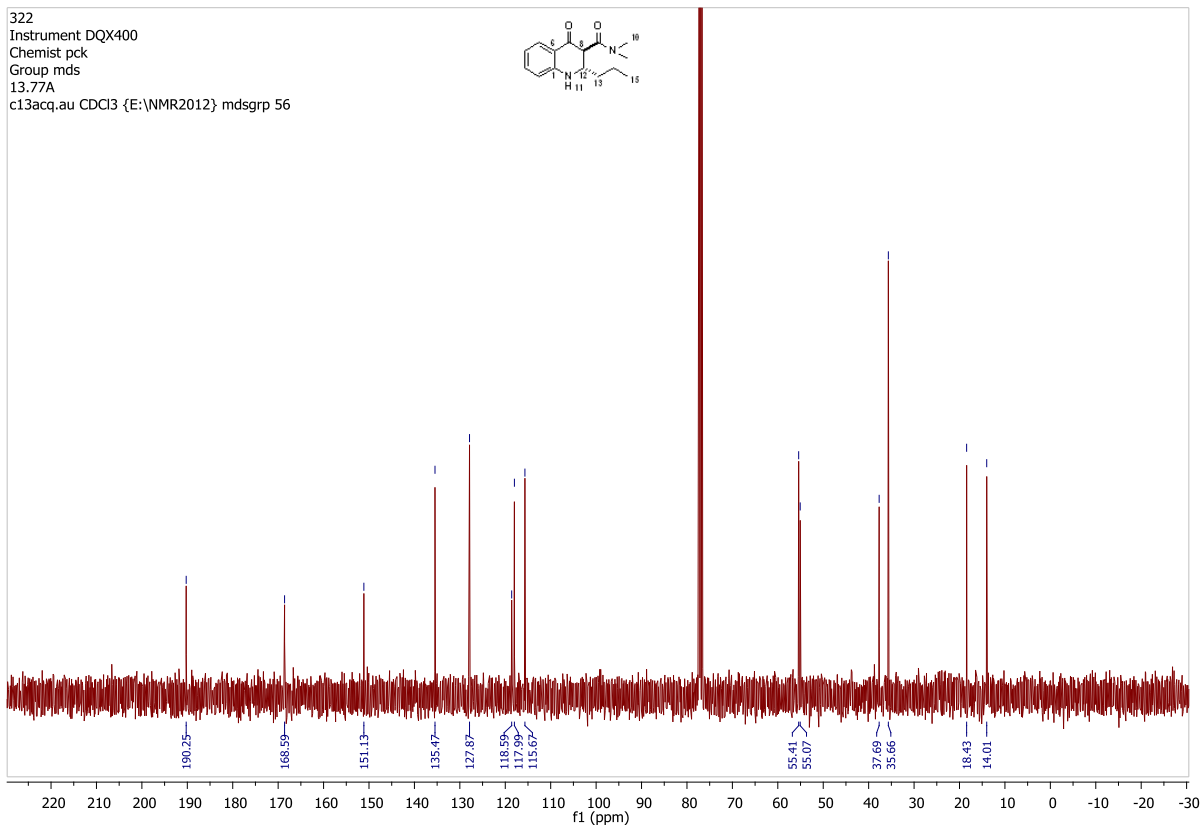

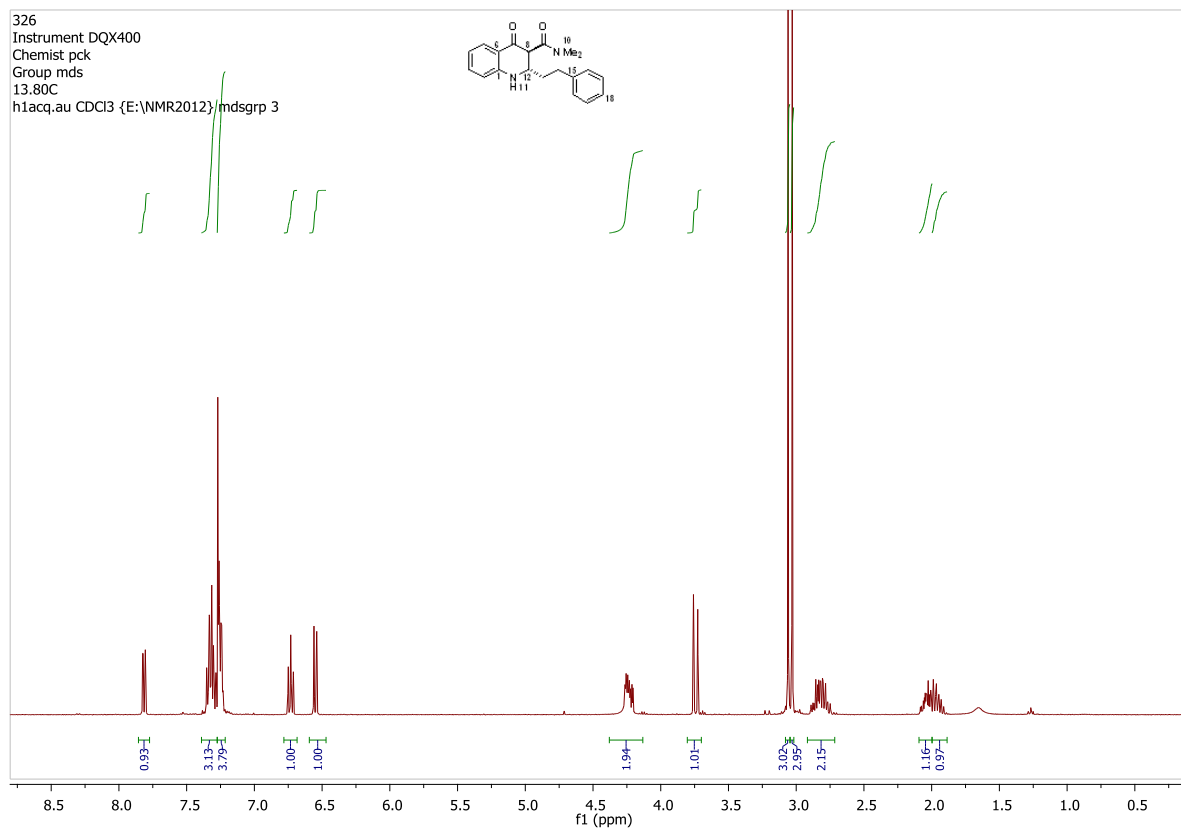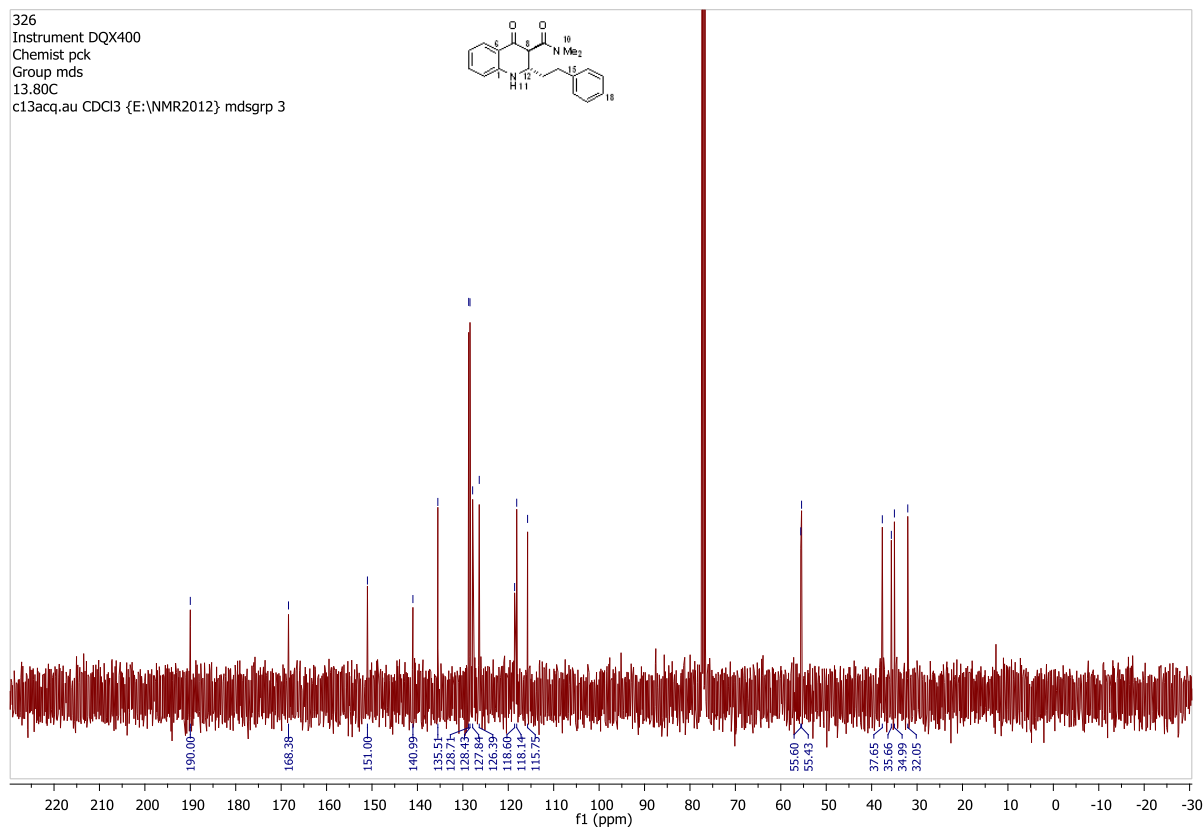

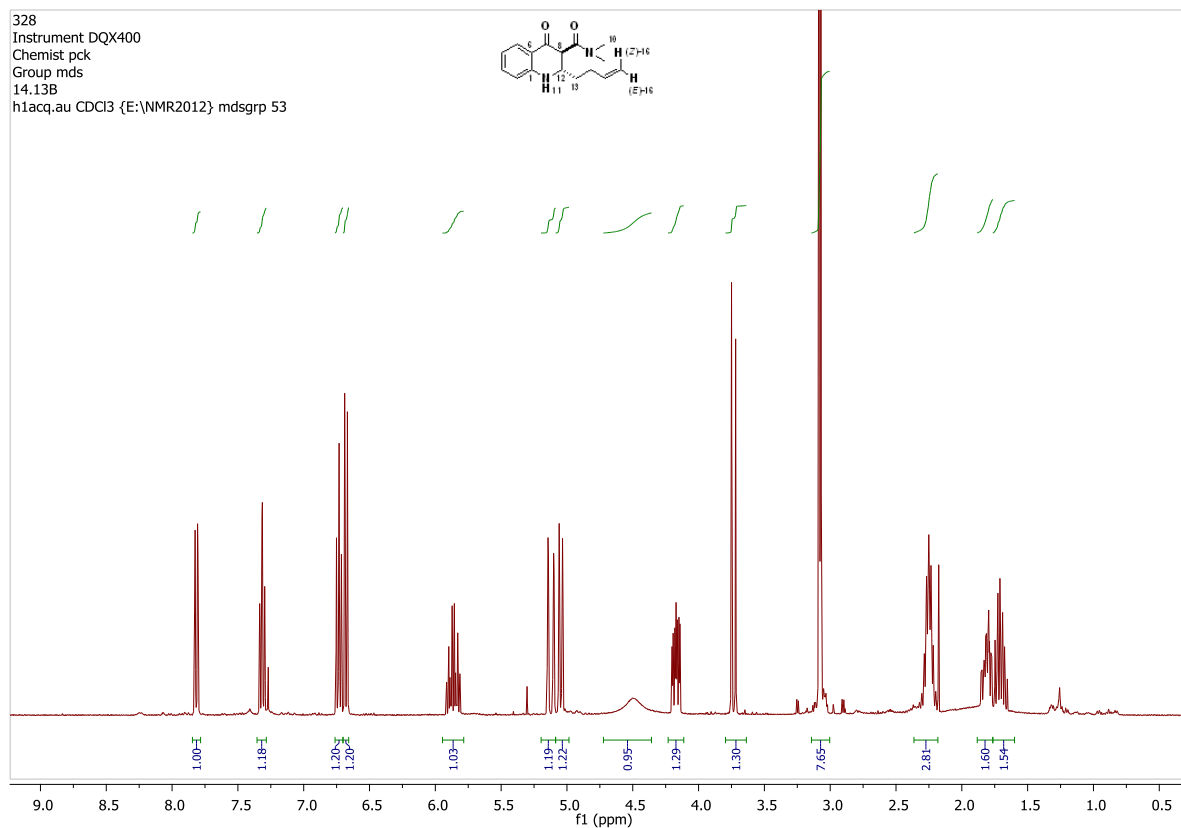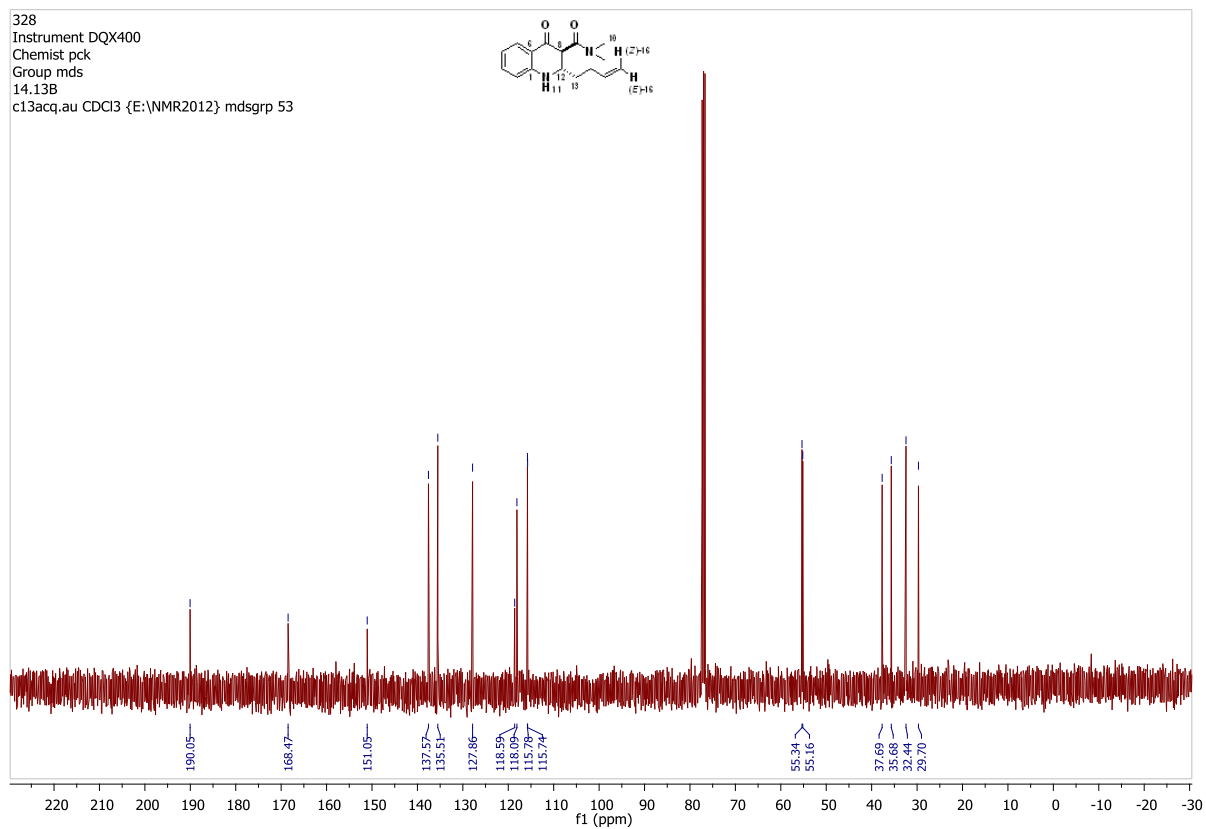



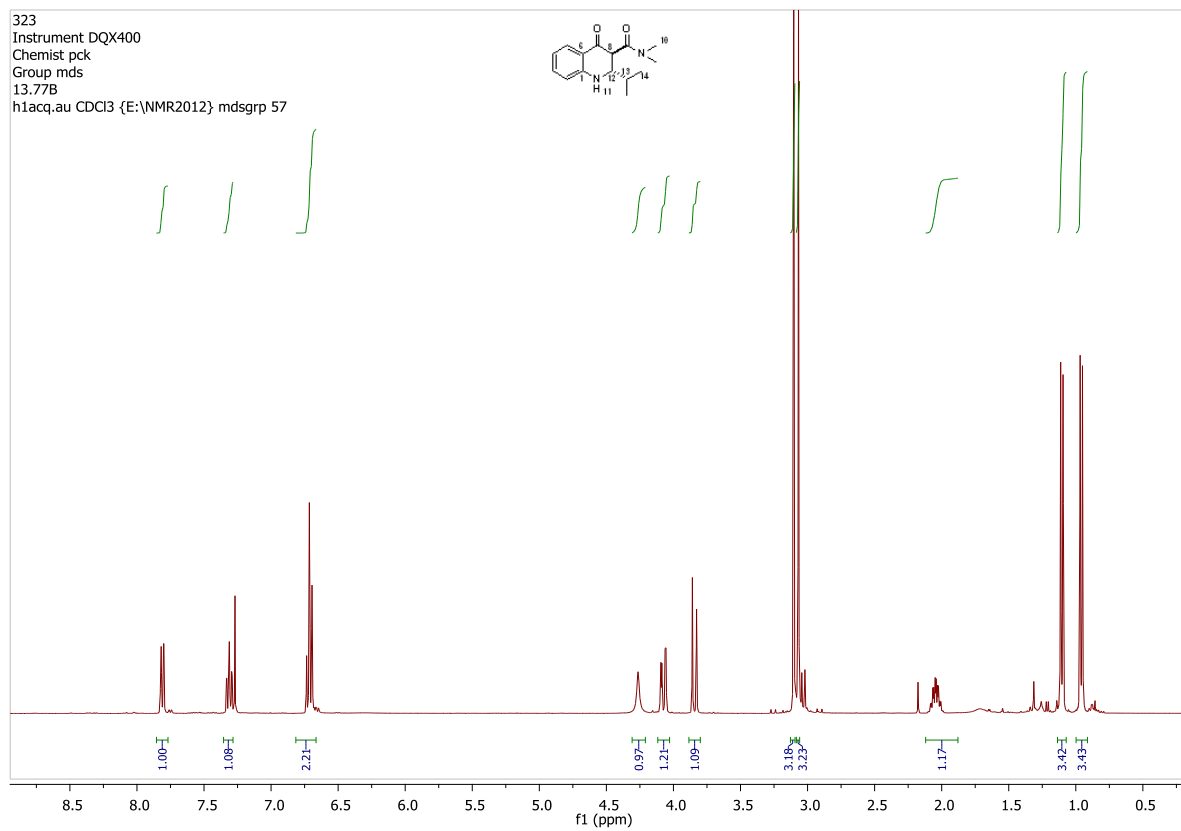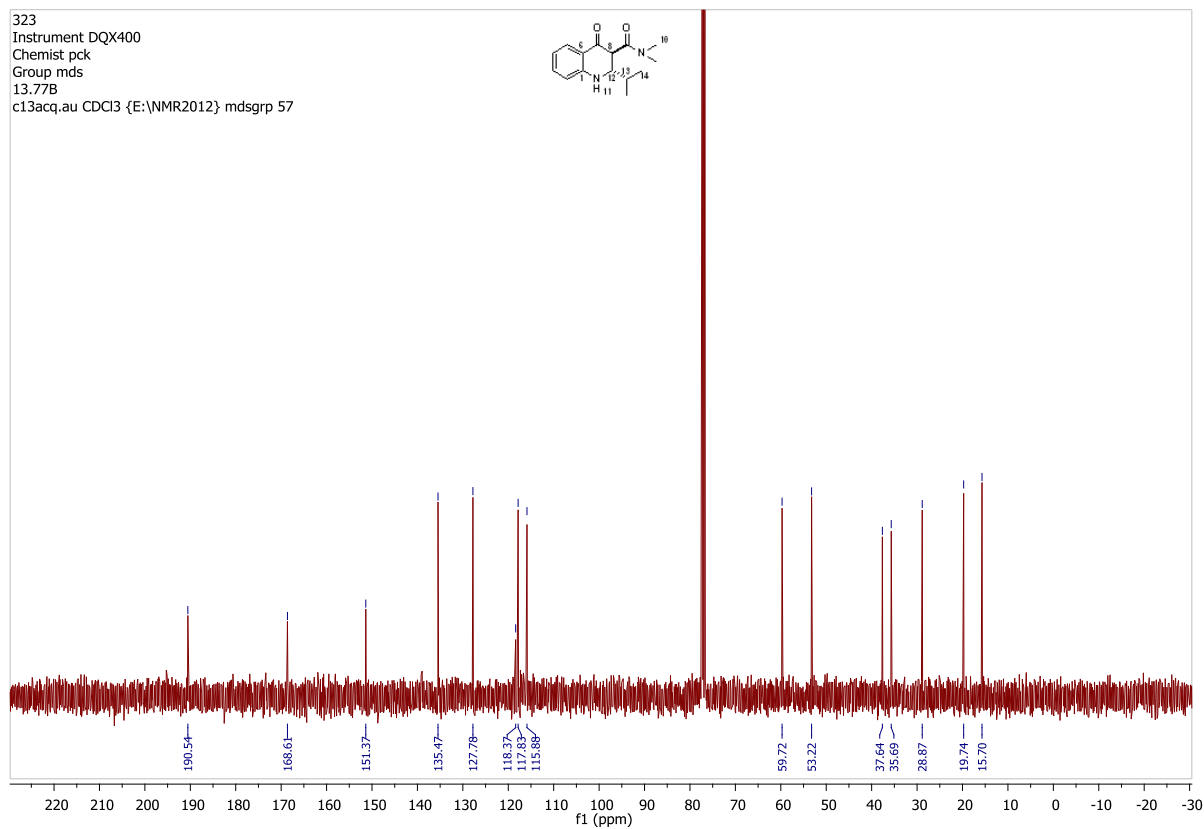

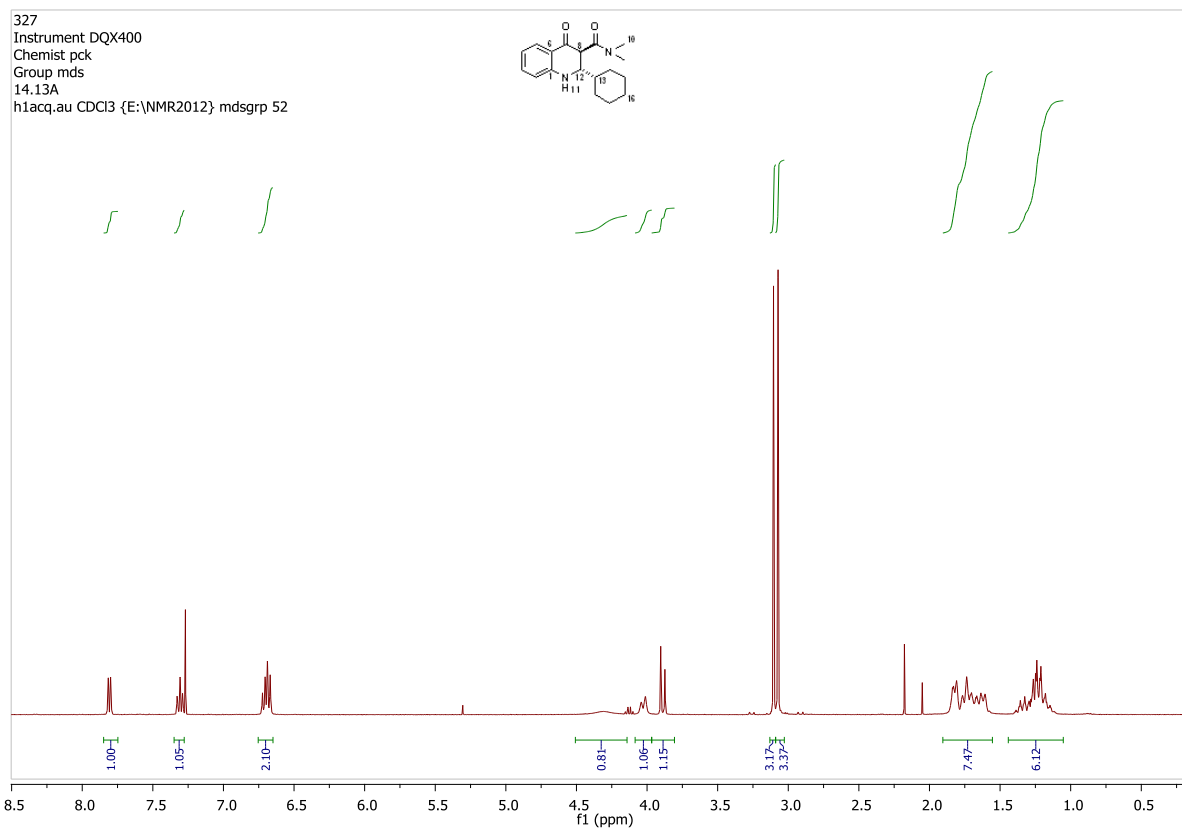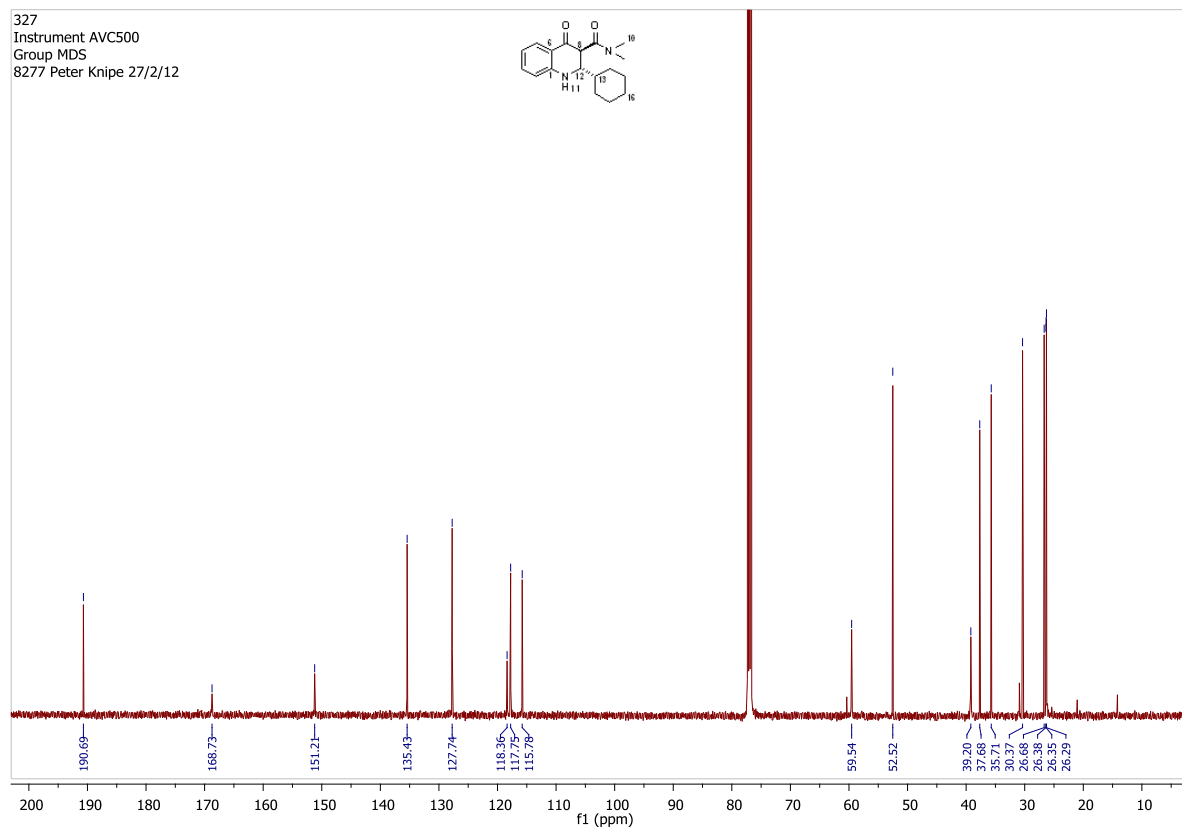

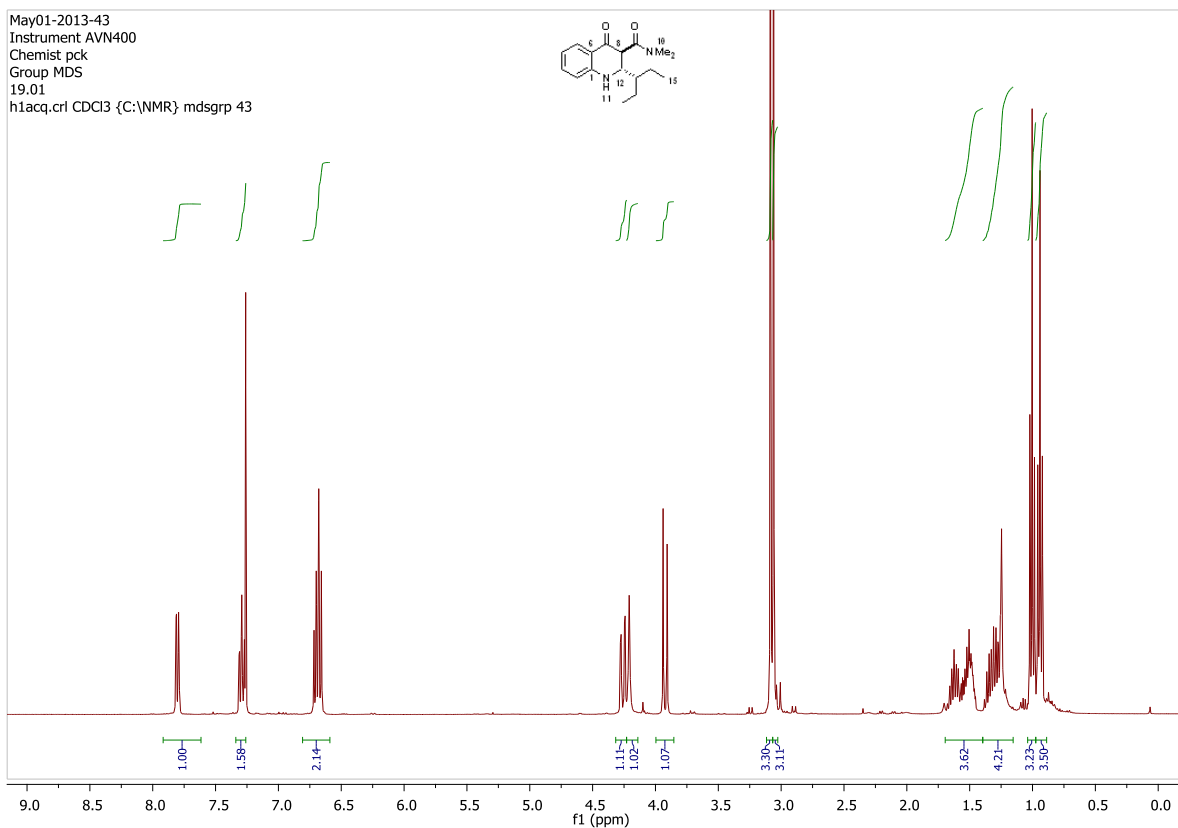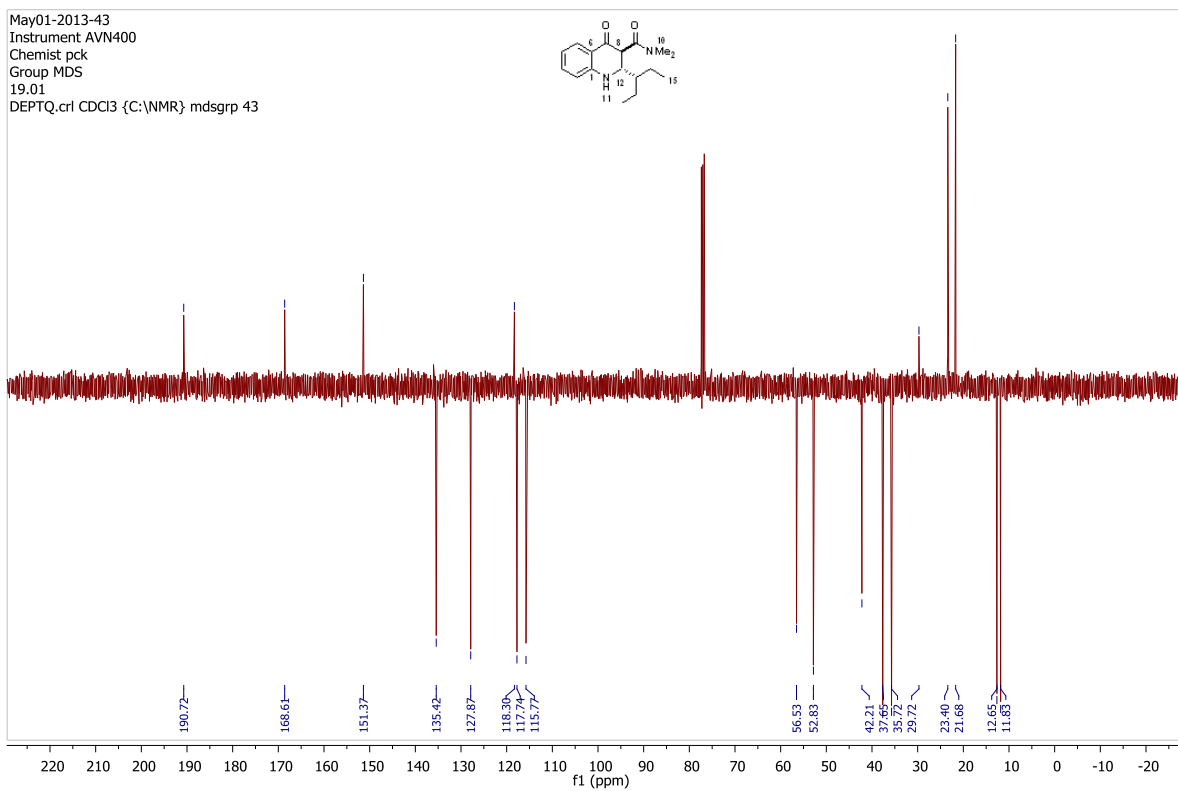

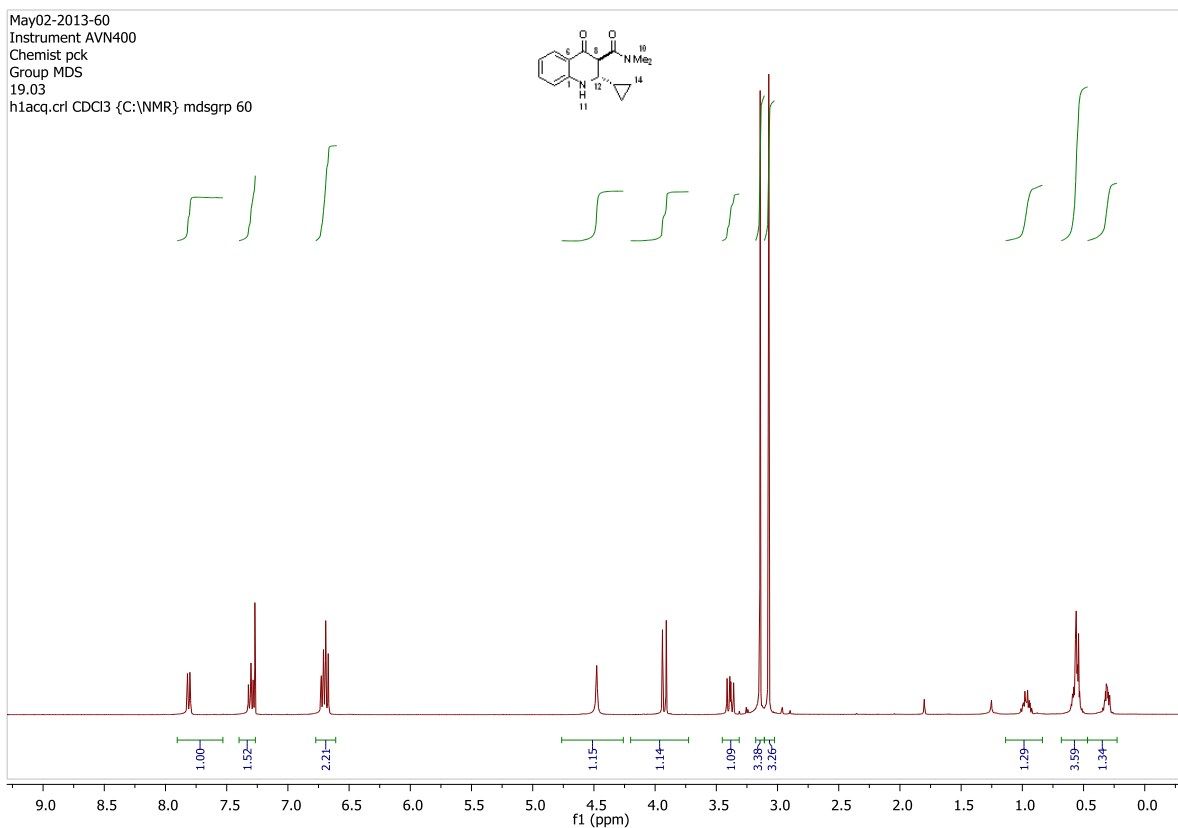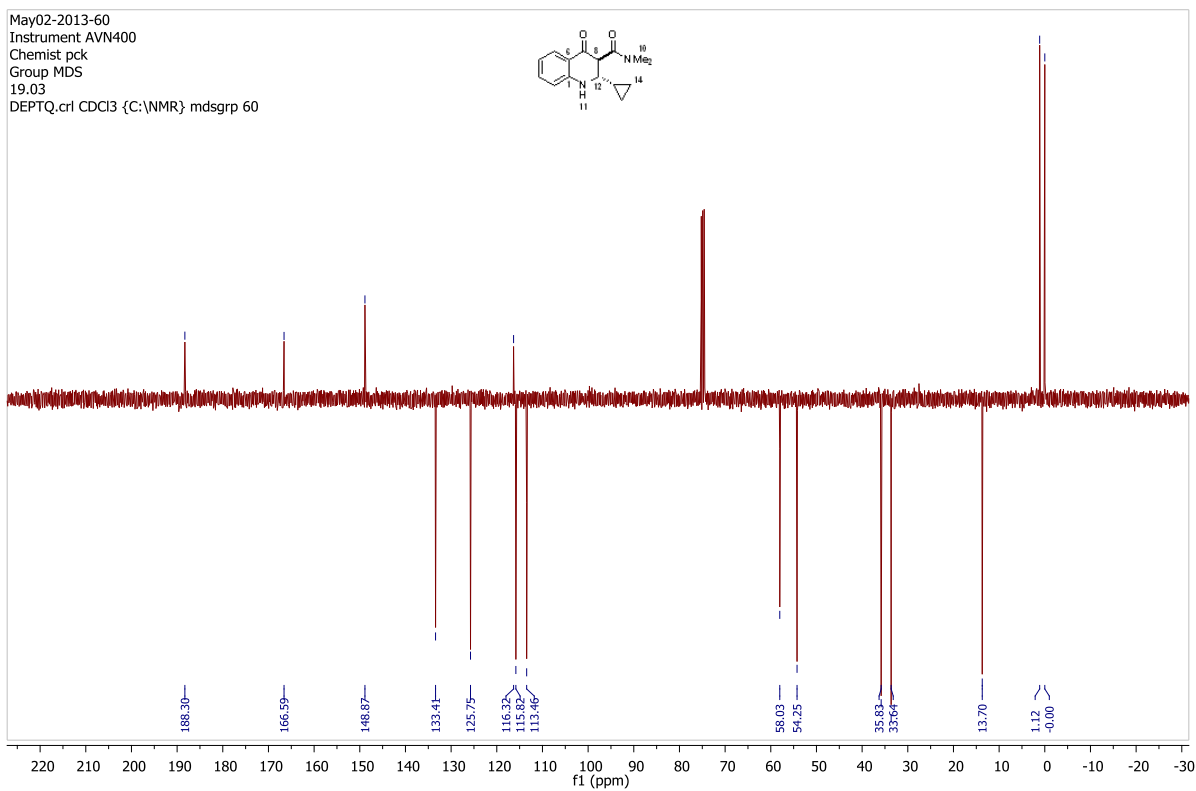

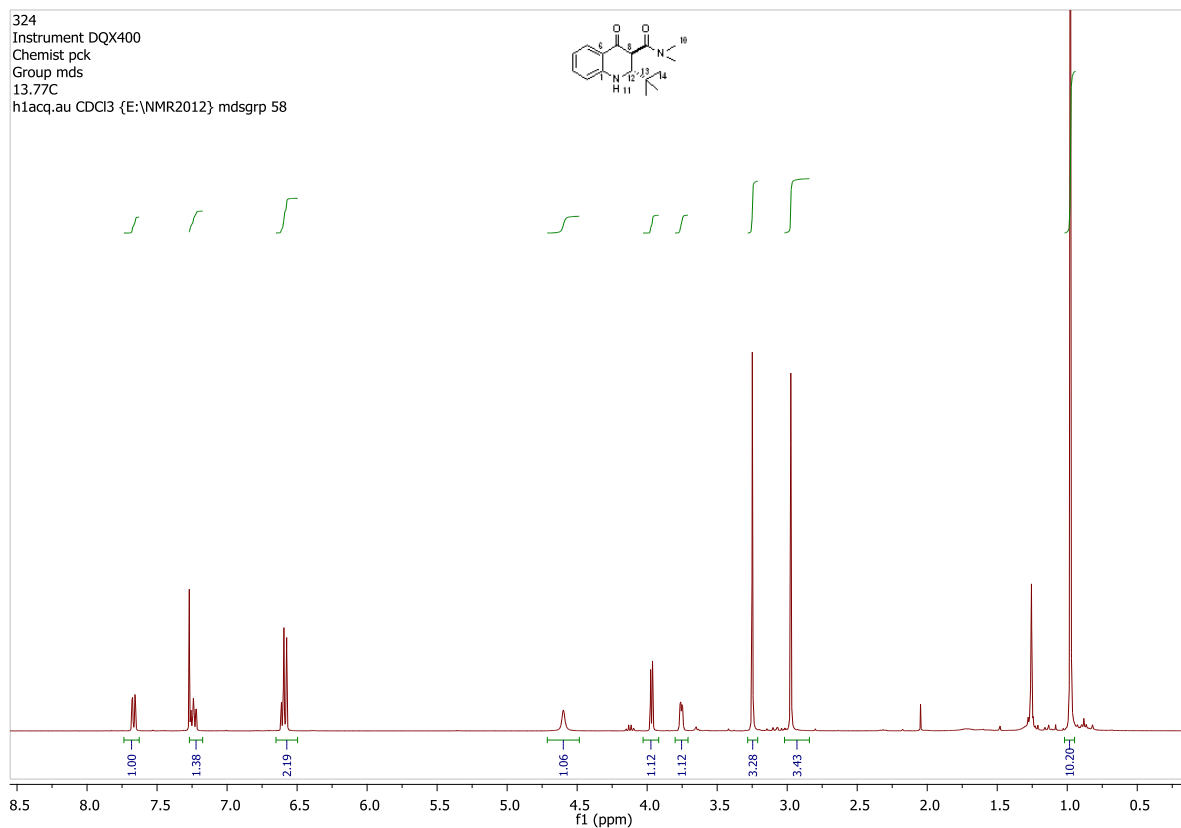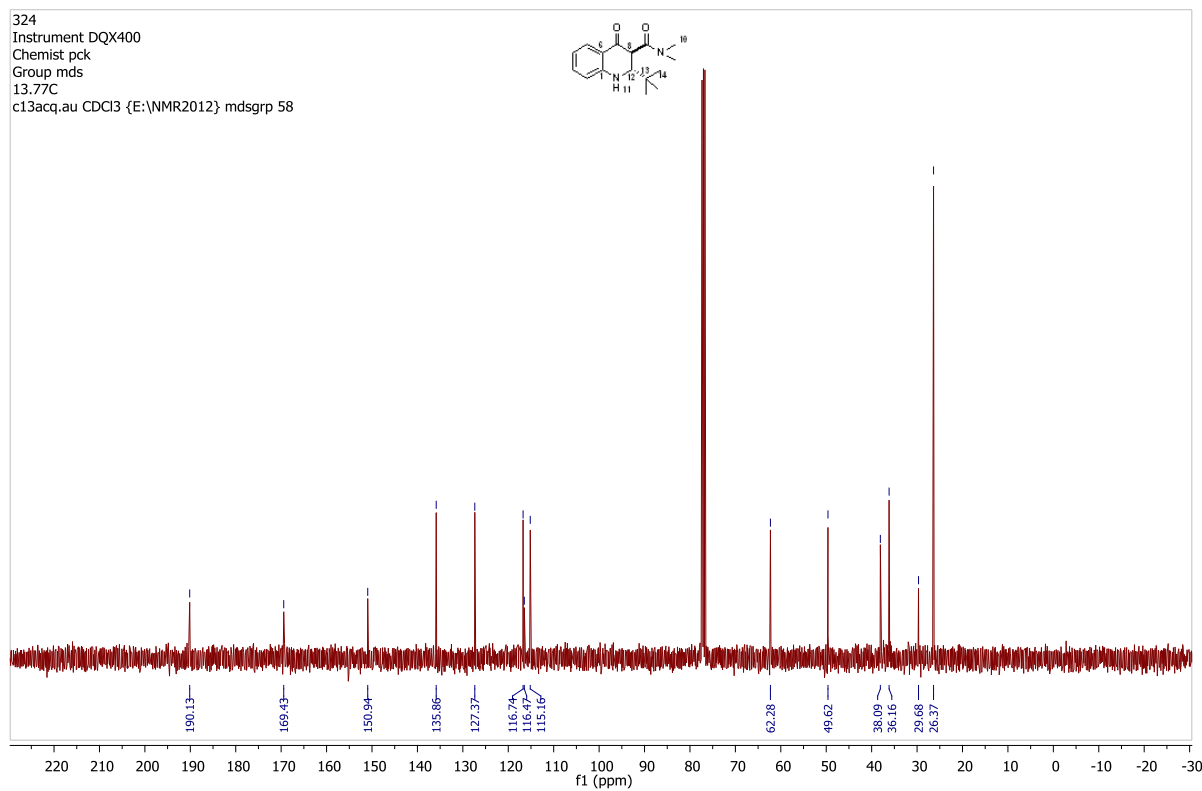

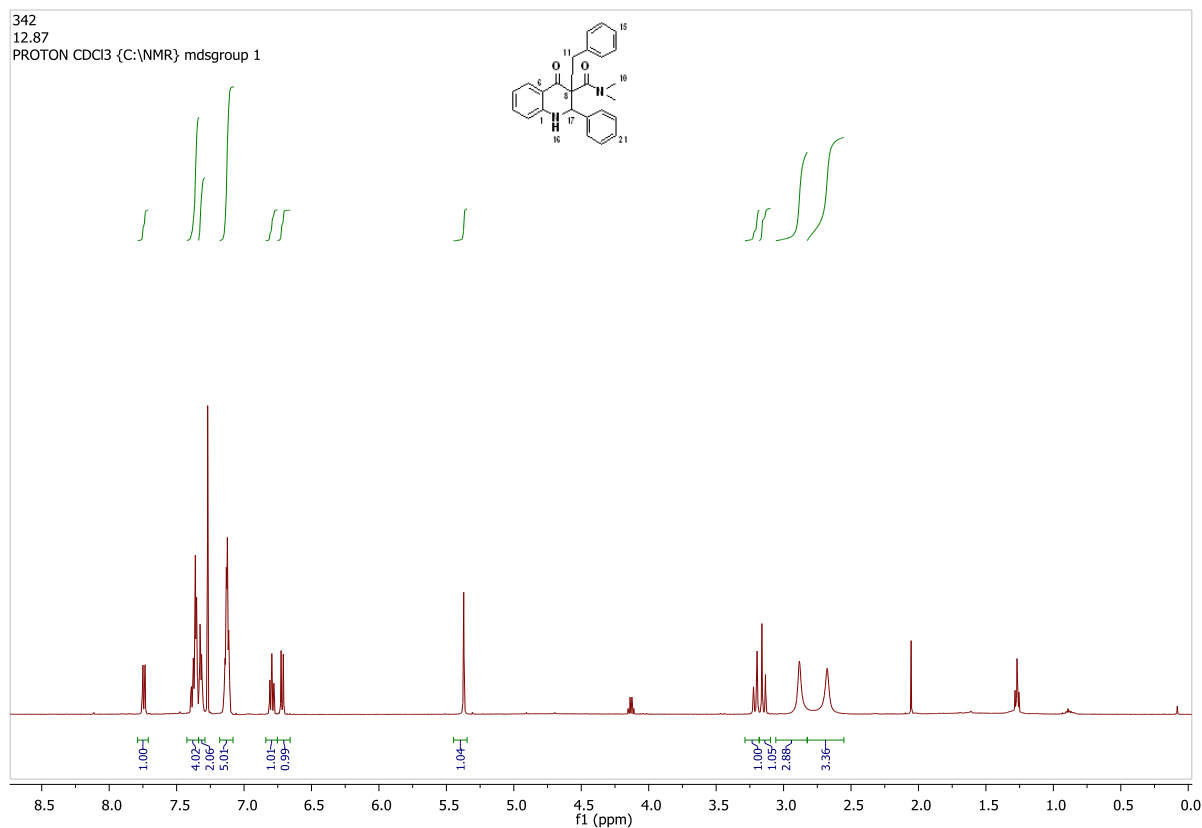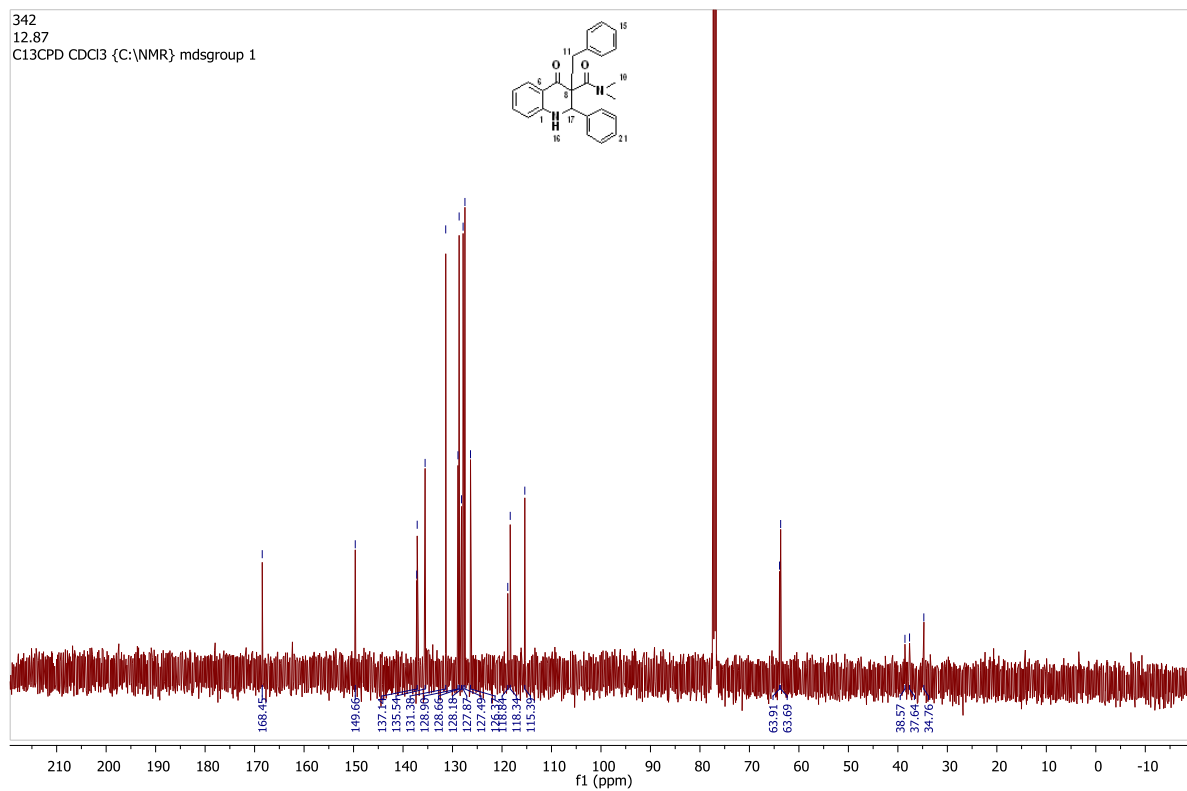



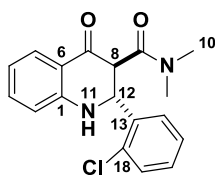

Operator:mdsgroup Timebase:Reismann\_3000 Sequence:14.06 30% ODH

Page 1-1  
11/6/2012 2:40 PM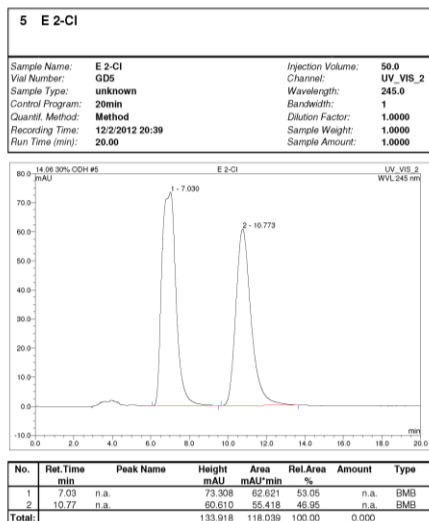

Operator:mdsgroup Timebase:reismann\_3000 Sequence:14.07 30% odh

Page 1-1  
11/6/2012 2:41 PM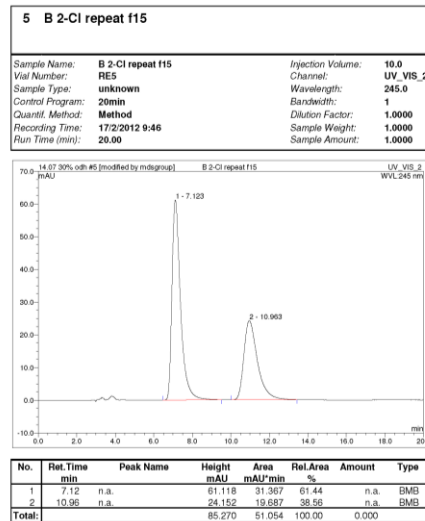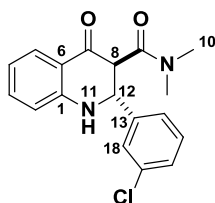

Operator:mdsgroup Timebase:Reismann\_3000 Sequence:14.06 30% ODH

Page 1-1  
11/6/2012 2:40 PM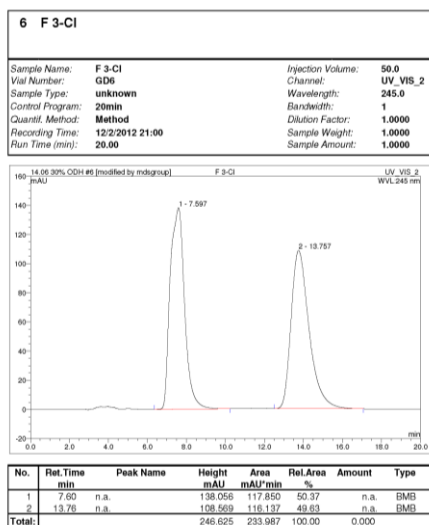

Operator:mdsgroup Timebase:reismann\_3000 Sequence:14.07 30% odh

Page 1-1  
11/6/2012 2:41 PM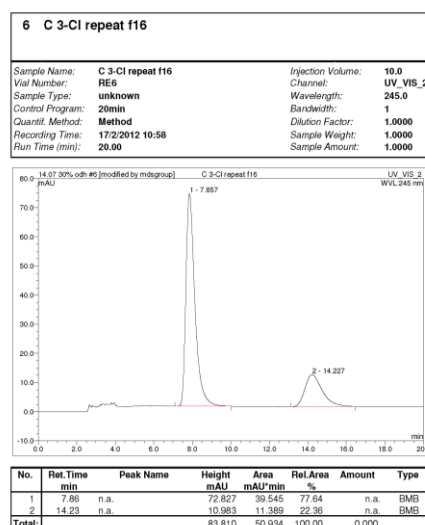



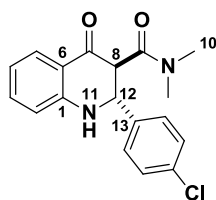

**Conditions:** Daicel Chiralpak OD-H, 30% IPA, 70% hexane, 1.0 mL.min<sup>-1</sup>,  $\lambda$  = 245 nm;  $t_R$ (major) = 7.5 min,  $t_R$ (minor) = 17.8 min

Operator:mdsgroup Timebase:Reismann\_3000 Sequence:14.06 30% ODH

Page 1-1  
11/6/2012 2:20 PM

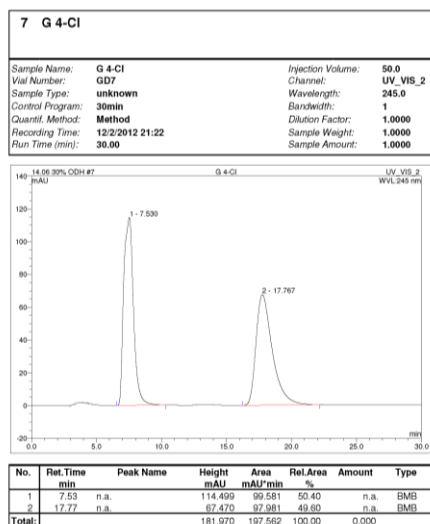

Operator:mdsadmin Timebase:reismann\_3000 Sequence:14.07 30% odh

Page 1-1  
18/12/2014 1:32 PM

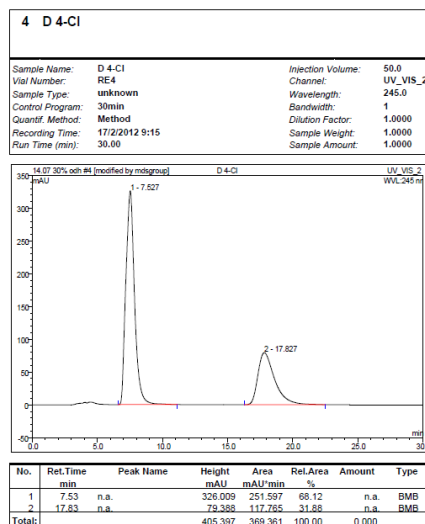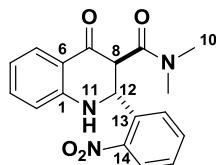

**Conditions:** Daicel Chiralpak OD-H, 30% IPA, 70% hexane, 1.0 mL.min<sup>-1</sup>,  $\lambda$  = 245 nm;  $t_R$ (major) = 9.5 min,  $t_R$ (minor) = 13.7 min

Operator:mdsgroup Timebase:Reismann\_3000 Sequence:14.06 30% ODH

Page 1-1  
4/5/2012 12:56 PM

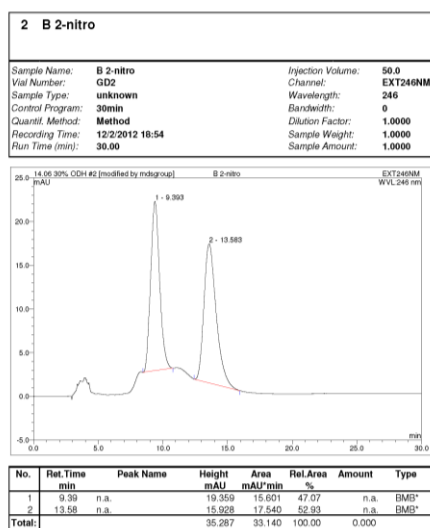

Operator:mdsgroup Timebase:reismann\_3000 Sequence:14.11 30% odh

Page 1-1  
4/5/2012 1:33 PM

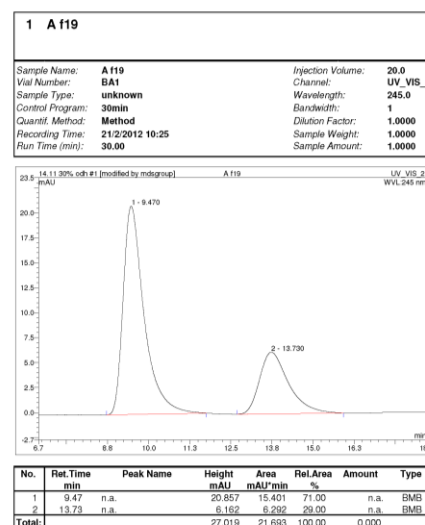

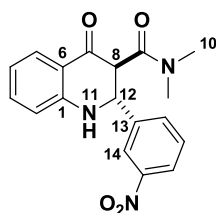

**Conditions:** Daicel Chiralpak OD-H, 30% IPA, 70% hexane, 1.0 mL.min<sup>-1</sup>,  $\lambda$  = 245 nm;  $t_R$ (major) = 12.9 min,  $t_R$ (minor) = 21.2 min

Operator:mdsgroup Timebase:Reismann\_3000 Sequence:14.06 30% ODH

Page 1-1  
4/5/2012 12:56 PM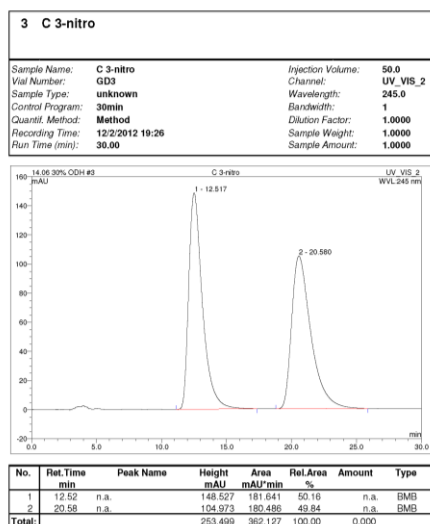

Operator:mdsgroup Timebase:reismann\_3000 Sequence:14.11 30% odh

Page 1-1  
4/5/2012 1:34 PM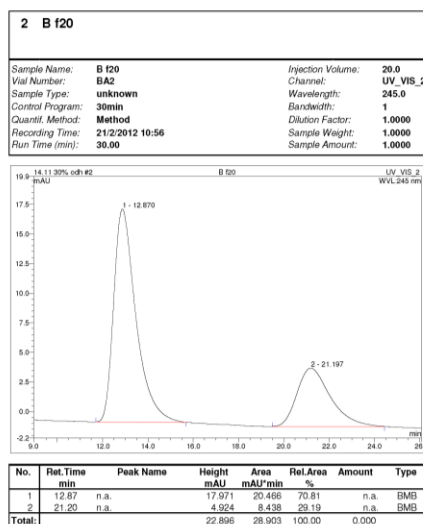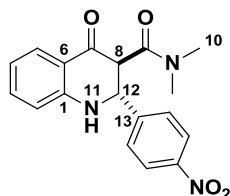

**Conditions:** Daicel Chiralpak OD-H, 30% IPA, 70% hexane, 1.0 mL.min<sup>-1</sup>,  $\lambda$  = 245 nm;  $t_R$ (major) = 12.3 min,  $t_R$ (minor) = 31.6 min

Operator:mdsgroup Timebase:Reismann\_3000 Sequence:14.06 30% ODH

Page 1-1  
4/5/2012 12:57 PM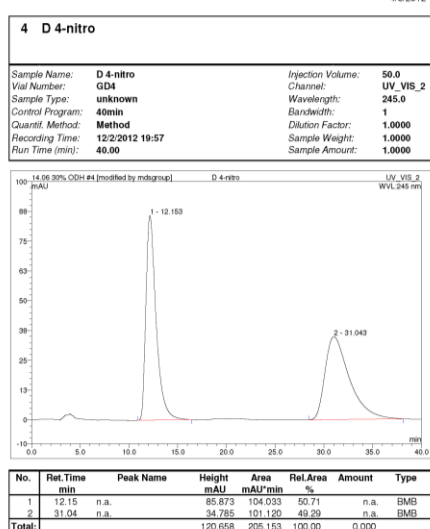

Operator:mdsgroup Timebase:reismann\_3000 Sequence:14.11 30% odh

Page 1-1  
4/5/2012 1:34 PM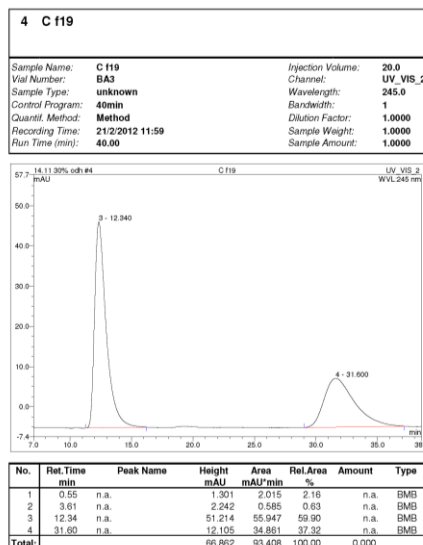

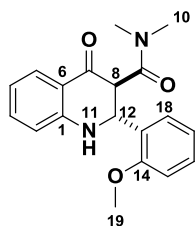

**Conditions:** Daicel Chiralpak OD-H, 50% IPA, 50% hexane, 1.0 mL.min<sup>-1</sup>,  $\lambda$  = 245 nm;  $t_R$ (major) = 5.5 min,  $t_R$ (minor) = 9.5 min

Operator: mdsadmin Timebase: reismann\_3000 Sequence: 18.55 50% ODH Page 1-1  
18/1/2014 1:35 PM

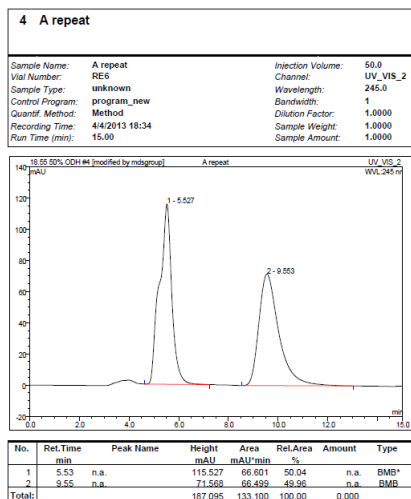

Operator: mdsadmin Timebase: reismann\_3000 Sequence: 18.56 50% ODH Page 1-1  
18/1/2014 1:35 PM

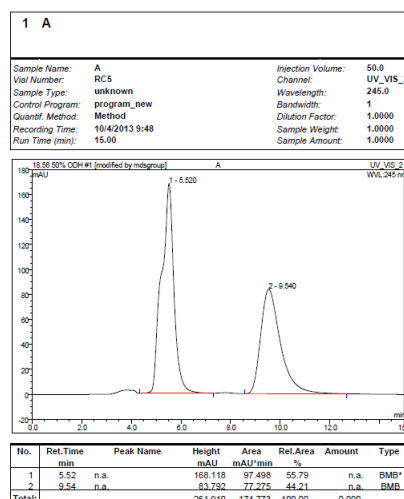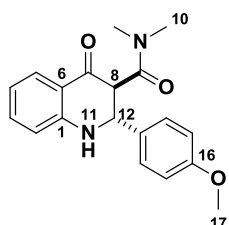

**Conditions:** Daicel Chiralpak OD-H, 50% IPA, 50% hexane, 1.0 mL.min<sup>-1</sup>,  $\lambda$  = 245 nm;  $t_R$ (major) = 6.1 min,  $t_R$ (minor) = 11.1 min

Operator: mdsadmin Timebase: reismann\_3000 Sequence: 18.55 50% ODH Page 1-1  
18/1/2014 1:35 PM

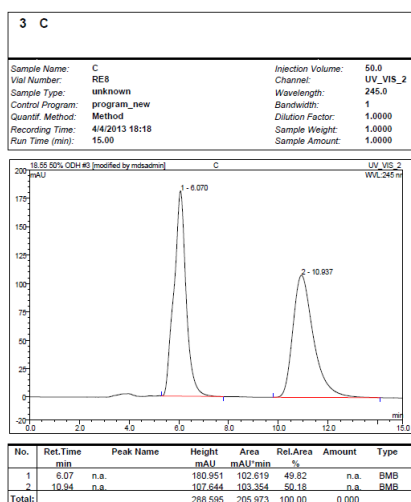

Operator: mdsadmin Timebase: reismann\_3000 Sequence: 18.56 50% ODH Page 1-1  
18/1/2014 2:47 PM

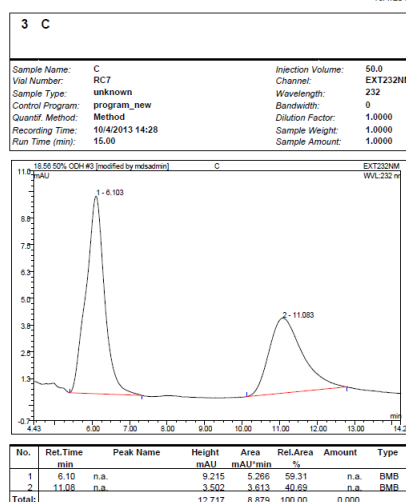

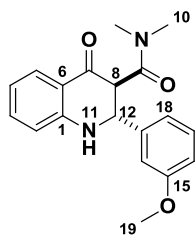

**Conditions:** Daicel Chiralpak OD-H, 50% IPA, 50% hexane, 1.0 mL.min<sup>-1</sup>,  $\lambda$  = 245 nm;  $t_R$ (major) = 6.5 min,  $t_R$ (minor) = 12.1 min

Operator:mdsadmin Timebase:reismann\_3000 Sequence:18.55 50% ODH

Page 1-1  
18/1/2014 1:35 PM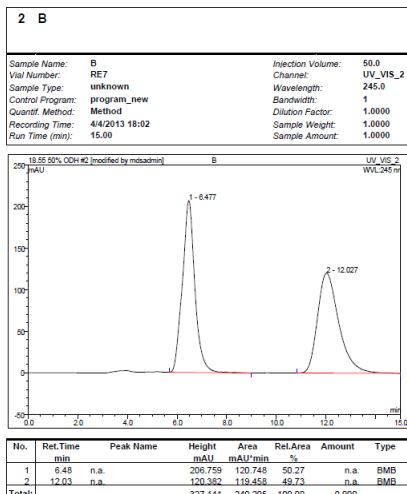

Operator:mdsadmin Timebase:reismann\_3000 Sequence:18.56 50% ODH

Page 1-1  
18/1/2014 1:34 PM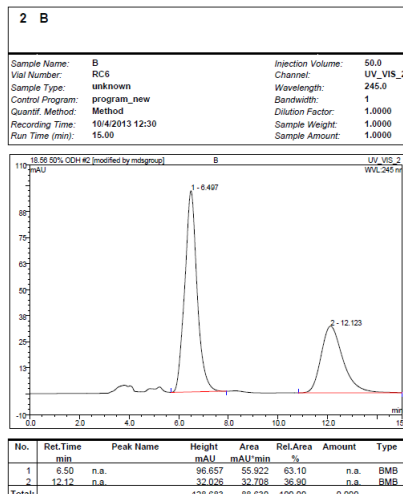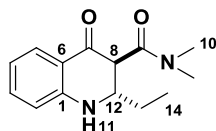

**Conditions:** Daicel Chiralpak OD-H, 30% IPA, 70% hexane, 1.0 mL.min<sup>-1</sup>,  $\lambda$  = 245 nm;  $t_R$ (major) = 5.7 min,  $t_R$ (minor) = 9.8 min

Operator:mdsadmin Timebase:Reismann\_3000 Sequence:14.06 30% ODH

Page 1-1  
11/6/2012 2:30 PM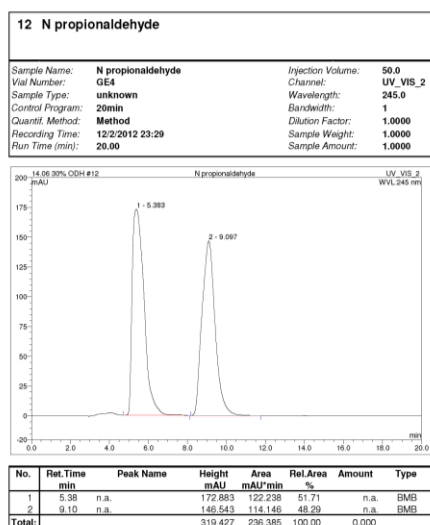

Operator:mdsadmin Timebase:ultimate\_3000 Sequence:13.808 F11 30% ODH

Page 1-1  
11/6/2012 2:31 PM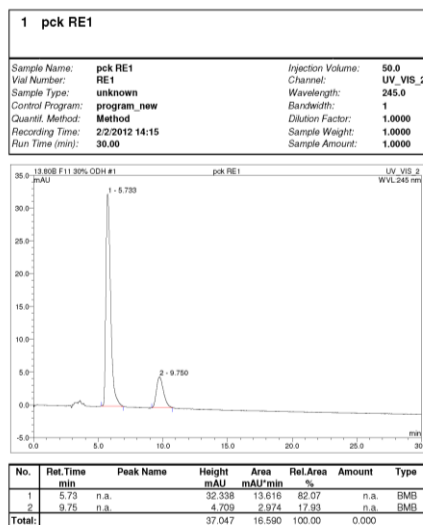

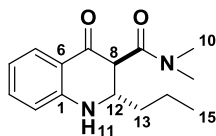

**Conditions:** Daicel Chiralpak OD-H, 30% IPA, 70% hexane, 1.0 mL.min<sup>-1</sup>,  $\lambda$  = 245 nm;  $t_R$ (major) = 5.4 min,  $t_R$ (minor) = 10.0 min

Operator:mdsgroup Timebase:Reismann\_3000 Sequence:14.06 30% ODH Page 1-1  
11/6/2012 2:36 PM

| 10 K n-butyraldehyde |                   |
|----------------------|-------------------|
| Sample Name:         | K n-butyraldehyde |
| Vial Number:         | GE2               |
| Sample Type:         | unknown           |
| Control Program:     | 20min             |
| Quantil. Method:     | Method            |
| Recording Time:      | 12/2/2012 22:46   |
| Run Time (min):      | 29.00             |
| Injection Volume:    | 50.0              |
| Channel:             | UV_VIS_2          |
| Wavelength:          | 245.0             |
| Bandwidth:           | 1                 |
| Dilution Factor:     | 1.0000            |
| Sample Weight:       | 1.0000            |
| Sample Amount:       | 1.0000            |

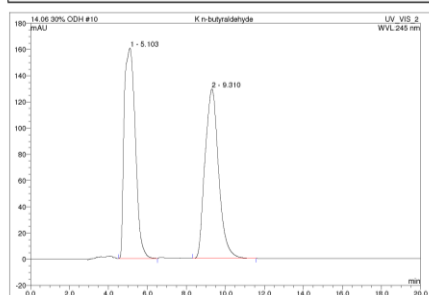

| No.    | Ret. Time min | Peak Name | Height mAU | Area mAU*min | Rel. Area % | Amount | Type |
|--------|---------------|-----------|------------|--------------|-------------|--------|------|
| 1      | 5.10          | n.a.      | 160.409    | 105.852      | 50.45       | n.a.   | BMB  |
| 2      | 9.31          | n.a.      | 129.184    | 103.960      | 49.55       | n.a.   | BMB  |
| Total: |               |           | 289.594    | 209.812      | 100.00      | 0.000  |      |

Operator:mdsgroup Timebase:ultimate\_3000 Sequence:13.77A F18-32 30% ODH Page 1-1  
11/6/2012 2:37 PM

| 1 pck RD2         |                 |
|-------------------|-----------------|
| Sample Name:      | pck RD2         |
| Vial Number:      | RD2             |
| Sample Type:      | unknown         |
| Control Program:  | program_new     |
| Quantil. Method:  | Method          |
| Recording Time:   | 30/1/2012 15:07 |
| Run Time (min):   | 30.00           |
| Injection Volume: | 20.0            |
| Channel:          | UV_VIS_2        |
| Wavelength:       | 245.0           |
| Bandwidth:        | 1               |
| Dilution Factor:  | 1.0000          |
| Sample Weight:    | 1.0000          |
| Sample Amount:    | 1.0000          |

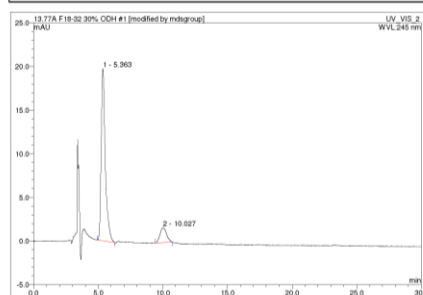

| No.    | Ret. Time min | Peak Name | Height mAU | Area mAU*min | Rel. Area % | Amount | Type |
|--------|---------------|-----------|------------|--------------|-------------|--------|------|
| 1      | 5.36          | n.a.      | 19.723     | 1.200        | 87.78       | n.a.   | BMB  |
| 2      | 10.03         | n.a.      | 1.728      | 1.003        | 12.22       | n.a.   | BMB  |
| Total: |               |           | 21.449     | 8.203        | 100.00      | 0.000  |      |

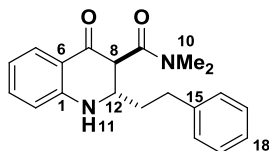

**Conditions:** Daicel Chiralpak OD-H, 30% IPA, 70% hexane, 1.0 mL.min<sup>-1</sup>,  $\lambda$  = 245 nm;  $t_R$ (minor) = 18.0 min,  $t_R$ (minor) = 27.4 min

Operator:mdsgroup Timebase:Reismann\_3000 Sequence:14.06 30% ODH Page 1-1  
11/6/2012 2:29 PM

| 13 O 3-phenyl propionaldehyde |                            |
|-------------------------------|----------------------------|
| Sample Name:                  | O 3-phenyl propionaldehyde |
| Vial Number:                  | GES                        |
| Sample Type:                  | unknown                    |
| Control Program:              | 40min                      |
| Quantil. Method:              | Method                     |
| Recording Time:               | 12/2/2012 23:50            |
| Run Time (min):               | 40.00                      |
| Injection Volume:             | 50.0                       |
| Channel:                      | UV_VIS_2                   |
| Wavelength:                   | 245.0                      |
| Bandwidth:                    | 1                          |
| Dilution Factor:              | 1.0000                     |
| Sample Weight:                | 1.0000                     |
| Sample Amount:                | 1.0000                     |

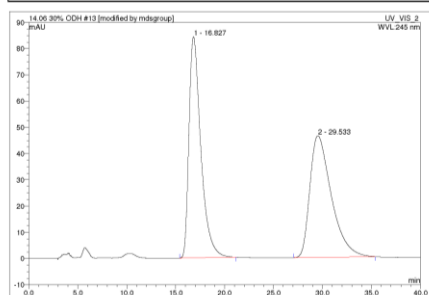

| No.    | Ret. Time min | Peak Name | Height mAU | Area mAU*min | Rel. Area % | Amount | Type |
|--------|---------------|-----------|------------|--------------|-------------|--------|------|
| 1      | 16.83         | n.a.      | 84.185     | 118.382      | 50.16       | n.a.   | BMB  |
| 2      | 29.53         | n.a.      | 46.354     | 117.620      | 49.84       | n.a.   | BMB  |
| Total: |               |           | 130.539    | 236.001      | 100.00      | 0.000  |      |

Operator:mdsgroup Timebase:ultimate\_3000 Sequence:13.80C 30% ODH Page 1-1  
11/6/2012 2:28 PM

| 2 stronger sample! |                  |
|--------------------|------------------|
| Sample Name:       | stronger sample! |
| Vial Number:       | RD7              |
| Sample Type:       | unknown          |
| Control Program:   | program_new      |
| Quantil. Method:   | Method           |
| Recording Time:    | 12/2/2012 18:14  |
| Run Time (min):    | 40.00            |
| Injection Volume:  | 50.0             |
| Channel:           | UV_VIS_2         |
| Wavelength:        | 245.0            |
| Bandwidth:         | 1                |
| Dilution Factor:   | 1.0000           |
| Sample Weight:     | 1.0000           |
| Sample Amount:     | 1.0000           |

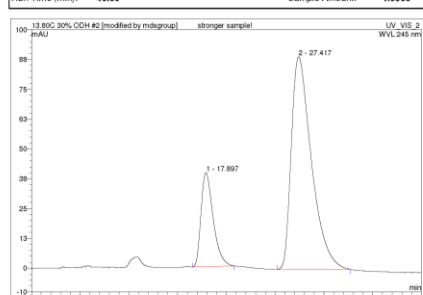

| No.    | Ret. Time min | Peak Name | Height mAU | Area mAU*min | Rel. Area % | Amount | Type |
|--------|---------------|-----------|------------|--------------|-------------|--------|------|
| 1      | 17.90         | n.a.      | 39.420     | 56.963       | 21.07       | n.a.   | BMB  |
| 2      | 27.42         | n.a.      | 89.122     | 213.409      | 78.93       | n.a.   | BMB  |
| Total: |               |           | 128.543    | 270.372      | 100.00      | 0.000  |      |

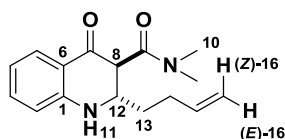

**Conditions:** Daicel Chiralpak OD-H, 30% IPA, 70% hexane, 1.0 mL.min<sup>-1</sup>,  $\lambda$  = 245 nm;  $t_R$ (major) = 5.5 min,  $t_R$ (minor) = 9.6 min

Operator:mdsgroup Timebase:Reismann\_3000 Sequence:14.13 30% odh

Page 1-1  
4/5/2012 12:58 PM

| 5 B rac          |                 |                   |          |
|------------------|-----------------|-------------------|----------|
| Sample Name:     | B rac           | Injection Volume: | 20.0     |
| Vial Number:     | BB5             | Channel:          | UV_VIS_2 |
| Sample Type:     | unknown         | Wavelength:       | 245.0    |
| Control Program: | program_new     | Bandwidth:        | 1        |
| Quantil. Method: | Method          | Dilution Factor:  | 1.0000   |
| Recording Time:  | 23/2/2012 15:47 | Sample Weight:    | 1.0000   |
| Run Time (min):  | 30.00           | Sample Amount:    | 1.0000   |

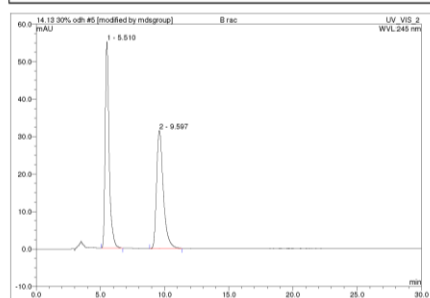

| No.    | Ret. Time min | Peak Name | Height mAU | Area mAU/min | Rel. Area % | Amount | Type |
|--------|---------------|-----------|------------|--------------|-------------|--------|------|
| 1      | 5.51          | n.a.      | 55.153     | 19.663       | 50.78       | n.a.   | BMB  |
| 2      | 9.60          | n.a.      | 31.544     | 19.060       | 49.22       | n.a.   | BMB  |
| Total: |               |           | 86.698     | 38.723       | 100.00      | 0.000  |      |

Operator:mdsgroup Timebase:Reismann\_3000 Sequence:14.13 30% odh

Page 1-1  
4/5/2012 1:37 PM

| 4 B f20          |                 |                   |          |
|------------------|-----------------|-------------------|----------|
| Sample Name:     | B f20           | Injection Volume: | 20.0     |
| Vial Number:     | BB4             | Channel:          | UV_VIS_2 |
| Sample Type:     | unknown         | Wavelength:       | 245.0    |
| Control Program: | program_new     | Bandwidth:        | 1        |
| Quantil. Method: | Method          | Dilution Factor:  | 1.0000   |
| Recording Time:  | 23/2/2012 15:16 | Sample Weight:    | 1.0000   |
| Run Time (min):  | 30.00           | Sample Amount:    | 1.0000   |

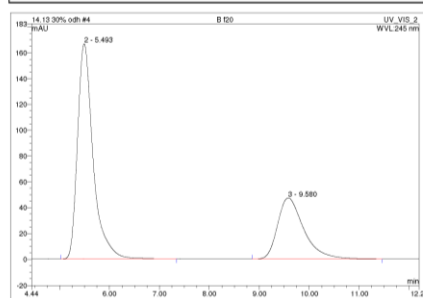

| No.    | Ret. Time min | Peak Name | Height mAU | Area mAU/min | Rel. Area % | Amount | Type |
|--------|---------------|-----------|------------|--------------|-------------|--------|------|
| 1      | 5.49          | n.a.      | 2.670      | 1.184        | 1.92        | n.a.   | BMB  |
| 2      | 5.49          | n.a.      | 156.756    | 60.119       | 66.84       | n.a.   | BMB  |
| 3      | 9.58          | n.a.      | 47.288     | 28.645       | 31.85       | n.a.   | BMB  |
| Total: |               |           | 216.911    | 89.948       | 100.00      | 0.000  |      |

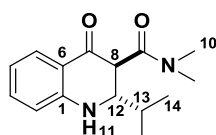

**Conditions:** Daicel Chiralpak OD-H, 30% IPA, 70% hexane, 1.0 mL.min<sup>-1</sup>,  $\lambda$  = 245 nm;  $t_R$ (major) = 5.5 min,  $t_R$ (minor) = 9.7 min

Operator:mdsgroup Timebase:Reismann\_3000 Sequence:14.06 30% ODH

Page 1-1  
11/6/2012 2:35 PM

| 11 L i-butylaldehyde |                   |                   |          |
|----------------------|-------------------|-------------------|----------|
| Sample Name:         | L i-butylaldehyde | Injection Volume: | 50.0     |
| Vial Number:         | OE3               | Channel:          | UV_VIS_2 |
| Sample Type:         | unknown           | Wavelength:       | 245.0    |
| Control Program:     | 20min             | Bandwidth:        | 1        |
| Quantil. Method:     | Method            | Dilution Factor:  | 1.0000   |
| Recording Time:      | 12/2/2012 23:07   | Sample Weight:    | 1.0000   |
| Run Time (min):      | 20.00             | Sample Amount:    | 1.0000   |

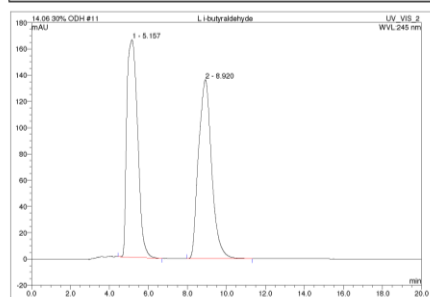

| No.    | Ret. Time min | Peak Name | Height mAU | Area mAU/min | Rel. Area % | Amount | Type |
|--------|---------------|-----------|------------|--------------|-------------|--------|------|
| 1      | 5.16          | n.a.      | 165.578    | 105.002      | 50.03       | n.a.   | BMB  |
| 2      | 8.92          | n.a.      | 136.277    | 105.869      | 49.97       | n.a.   | BMB  |
| Total: |               |           | 301.855    | 211.871      | 100.00      | 0.000  |      |

Operator:mdsgroup Timebase:ultimate\_3000 Sequence:13.77B F22-36 30% ODH

Page 1-1  
11/6/2012 2:35 PM

| 1 pck RD1        |                 |                   |          |
|------------------|-----------------|-------------------|----------|
| Sample Name:     | pck RD1         | Injection Volume: | 20.0     |
| Vial Number:     | RD1             | Channel:          | UV_VIS_2 |
| Sample Type:     | unknown         | Wavelength:       | 245.0    |
| Control Program: | program_new     | Bandwidth:        | 1        |
| Quantil. Method: | Method          | Dilution Factor:  | 1.0000   |
| Recording Time:  | 30/1/2012 14:23 | Sample Weight:    | 1.0000   |
| Run Time (min):  | 30.00           | Sample Amount:    | 1.0000   |

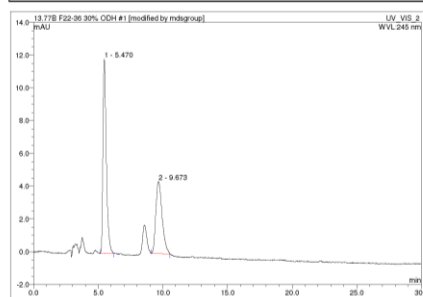

| No.    | Ret. Time min | Peak Name | Height mAU | Area mAU/min | Rel. Area % | Amount | Type |
|--------|---------------|-----------|------------|--------------|-------------|--------|------|
| 1      | 5.47          | n.a.      | 11.877     | 3.605        | 59.18       | n.a.   | BMB  |
| 2      | 9.67          | n.a.      | 4.404      | 2.486        | 40.82       | n.a.   | BMB  |
| Total: |               |           | 16.281     | 6.092        | 100.00      | 0.000  |      |

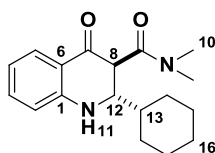

**Conditions:** Daicel Chiralpak OD-H, 30% IPA, 70% hexane, 1.0 mL.min<sup>-1</sup>,  $\lambda$  = 245 nm;  $t_R$ (major) = 5.3 min,  $t_R$ (minor) = 9.8 min

Operator:mdsgroup Timebase:Reismann\_3000 Sequence:14.13 30% odh

Page 1-1  
4/5/2012 12:57 PM

| 3 A rac           |                 |
|-------------------|-----------------|
| Sample Name:      | A rac           |
| Vial Number:      | BB3             |
| Sample Type:      | unknown         |
| Control Program:  | program_new     |
| Quantif. Method:  | Method          |
| Recording Time:   | 23/2/2012 14:44 |
| Run Time (min):   | 30.00           |
| Injection Volume: | 20.0            |
| Channel:          | UV_VIS_2        |
| Wavelength:       | 245.0           |
| Bandwidth:        | 1               |
| Dilution Factor:  | 1.0000          |
| Sample Weight:    | 1.0000          |
| Sample Amount:    | 1.0000          |

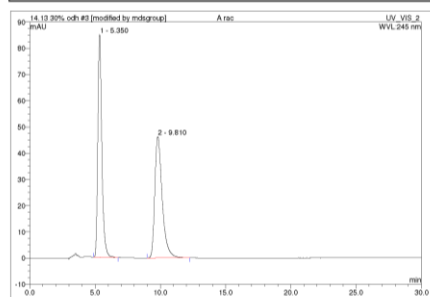

| No.    | Ret.Time min | Peak Name | Height mAU | Area mAU*min | Rel.Area % | Amount | Type |
|--------|--------------|-----------|------------|--------------|------------|--------|------|
| 1      | 5.35         | n.a.      | 84.087     | 30.169       | 49.84      | n.a.   | BMB  |
| 2      | 9.81         | n.a.      | 46.292     | 30.358       | 50.16      | n.a.   | BMB  |
| Total: |              |           | 131.179    | 60.527       | 100.00     | 0.000  |      |

Operator:mdsgroup Timebase:Reismann\_3000 Sequence:14.13 30% odh

Page 1-1  
4/5/2012 1:36 PM

| 2 A f26           |                 |
|-------------------|-----------------|
| Sample Name:      | A f26           |
| Vial Number:      | BB2             |
| Sample Type:      | unknown         |
| Control Program:  | program_new     |
| Quantif. Method:  | Method          |
| Recording Time:   | 23/2/2012 13:35 |
| Run Time (min):   | 30.00           |
| Injection Volume: | 20.0            |
| Channel:          | UV_VIS_2        |
| Wavelength:       | 245.0           |
| Bandwidth:        | 1               |
| Dilution Factor:  | 1.0000          |
| Sample Weight:    | 1.0000          |
| Sample Amount:    | 1.0000          |

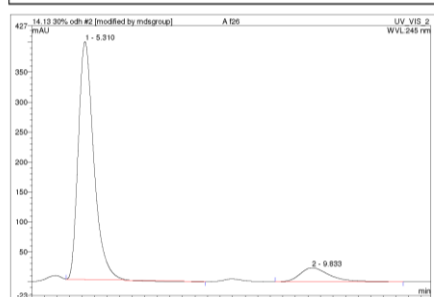

| No.    | Ret.Time min | Peak Name | Height mAU | Area mAU*min | Rel.Area % | Amount | Type |
|--------|--------------|-----------|------------|--------------|------------|--------|------|
| 1      | 5.31         | n.a.      | 397.159    | 141.572      | 90.26      | n.a.   | BMB  |
| 2      | 9.83         | n.a.      | 23.091     | 15.284       | 9.74       | n.a.   | BMB  |
| Total: |              |           | 420.250    | 156.856      | 100.00     | 0.000  |      |

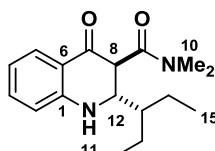

**Conditions:** Daicel Chiralpak IC, 50% IPA, 50% hexane, 1.0 mL.min<sup>-1</sup>,  $\lambda$  = 245 nm;  $t_R$ (major) = 10.0 min,  $t_R$ (minor) = 13.6 min

Operator:mdsadmin Timebase:reismann\_3000 Sequence:18.86 50% IC

Page 1-1  
18/1/2014 1:41 PM

| 2 rac repeat      |                 |
|-------------------|-----------------|
| Sample Name:      | rac repeat      |
| Vial Number:      | BA2             |
| Sample Type:      | unknown         |
| Control Program:  | program_new     |
| Quantif. Method:  | Method          |
| Recording Time:   | 27/4/2013 12:31 |
| Run Time (min):   | 60.00           |
| Injection Volume: | 50.0            |
| Channel:          | UV_VIS_2        |
| Wavelength:       | 245.0           |
| Bandwidth:        | 1               |
| Dilution Factor:  | 1.0000          |
| Sample Weight:    | 1.0000          |
| Sample Amount:    | 1.0000          |

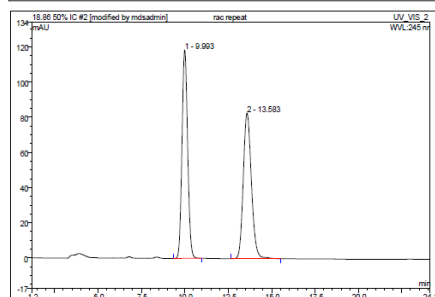

| No.    | Ret.Time min | Peak Name | Height mAU | Area mAU*min | Rel.Area % | Amount | Type |
|--------|--------------|-----------|------------|--------------|------------|--------|------|
| 1      | 9.99         | n.a.      | 118.560    | 44.572       | 49.81      | n.a.   | BMB  |
| 2      | 13.58        | n.a.      | 92.981     | 44.912       | 50.19      | n.a.   | BMB  |
| Total: |              |           | 201.422    | 89.484       | 100.00     | 0.000  |      |

Operator:mdsadmin Timebase:reismann\_3000 Sequence:18.86 50% IC

Page 1-1  
18/1/2014 1:44 PM

| 3 Asym            |                 |
|-------------------|-----------------|
| Sample Name:      | Asym            |
| Vial Number:      | BA3             |
| Sample Type:      | unknown         |
| Control Program:  | program_new     |
| Quantif. Method:  | Method          |
| Recording Time:   | 27/4/2013 13:49 |
| Run Time (min):   | 16.00           |
| Injection Volume: | 50.0            |
| Channel:          | UV_VIS_2        |
| Wavelength:       | 245.0           |
| Bandwidth:        | 1               |
| Dilution Factor:  | 1.0000          |
| Sample Weight:    | 1.0000          |
| Sample Amount:    | 1.0000          |

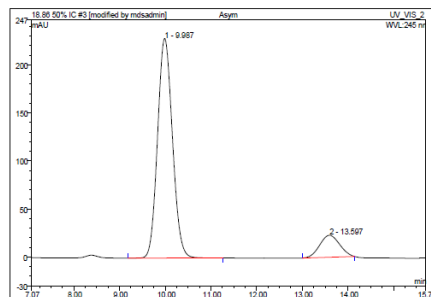

| No.    | Ret.Time min | Peak Name | Height mAU | Area mAU*min | Rel.Area % | Amount | Type |
|--------|--------------|-----------|------------|--------------|------------|--------|------|
| 1      | 9.99         | n.a.      | 226.694    | 86.361       | 86.25      | n.a.   | BMB  |
| 2      | 13.60        | n.a.      | 22.638     | 11.501       | 11.75      | n.a.   | BMB  |
| Total: |              |           | 251.533    | 97.862       | 100.00     | 0.000  |      |

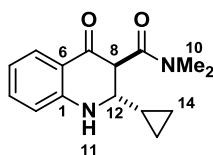

**Conditions:** Daicel Chiralpak IC, 50% IPA, 50% hexane, 1.0 mL.min<sup>-1</sup>,  $\lambda$  = 245 nm;  $t_R$ (major) = 14.2 min,  $t_R$ (minor) = 18.5 min

Operator:mdsadmin Timebase:reismann\_3000 Sequence:19.03 50% IC

Page 1-1  
18/12/2014 1:45 PM

| 1 rac            |                |                   |          |
|------------------|----------------|-------------------|----------|
| Sample Name:     | rac            | Injection Volume: | 50.0     |
| Vial Number:     | BB1            | Channel:          | UV_VIS_2 |
| Sample Type:     | unknown        | Wavelength:       | 245.0    |
| Control Program: | program_new    | Bandwidth:        | 1        |
| Quantif. Method: | Method         | Dilution Factor:  | 1.0000   |
| Recording Time:  | 1/5/2013 13:56 | Sample Weight:    | 1.0000   |
| Run Time (min):  | 30.00          | Sample Amount:    | 1.0000   |

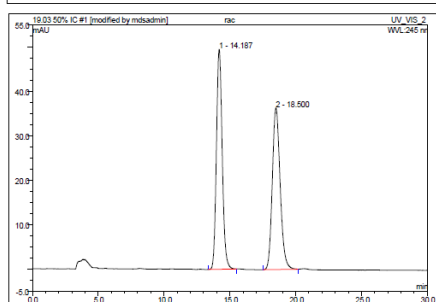

| No.    | Ret.Time<br>min | Peak Name | Height<br>mAU | Area<br>mAU*min | Rel.Area<br>% | Amount | Type |
|--------|-----------------|-----------|---------------|-----------------|---------------|--------|------|
| 1      | 14.19           | n.a.      | 49.588        | 25.275          | 50.18         | n.a.   | BMB  |
| 2      | 18.50           | n.a.      | 38.417        | 25.093          | 49.82         | n.a.   | BMB  |
| Total: |                 |           | 85.985        | 50.369          | 100.00        | 0.000  |      |

Operator:mdsadmin Timebase:reismann\_3000 Sequence:19.03 50% IC

Page 1-1  
18/12/2014 1:45 PM

| 2 asym           |                |                   |          |
|------------------|----------------|-------------------|----------|
| Sample Name:     | asym           | Injection Volume: | 50.0     |
| Vial Number:     | BB1            | Channel:          | UV_VIS_2 |
| Sample Type:     | unknown        | Wavelength:       | 245.0    |
| Control Program: | program_new    | Bandwidth:        | 1        |
| Quantif. Method: | Method         | Dilution Factor:  | 1.0000   |
| Recording Time:  | 1/5/2013 14:29 | Sample Weight:    | 1.0000   |
| Run Time (min):  | 25.41          | Sample Amount:    | 1.0000   |

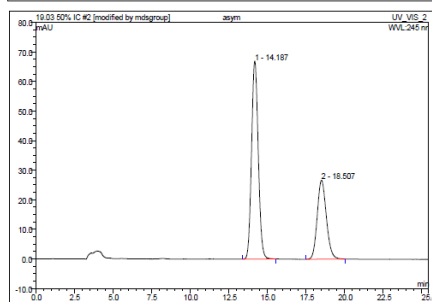

| No.    | Ret.Time<br>min | Peak Name | Height<br>mAU | Area<br>mAU*min | Rel.Area<br>% | Amount | Type |
|--------|-----------------|-----------|---------------|-----------------|---------------|--------|------|
| 1      | 14.19           | n.a.      | 66.837        | 33.009          | 64.81         | n.a.   | BMB  |
| 2      | 18.51           | n.a.      | 28.685        | 18.252          | 35.19         | n.a.   | BMB  |
| Total: |                 |           | 93.623        | 51.861          | 100.00        | 0.000  |      |

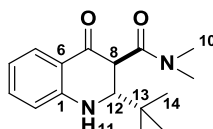

**Conditions:** Daicel Chiralpak OD-H, 30% IPA, 70% hexane, 1.0 mL.min<sup>-1</sup>,  $\lambda$  = 245 nm;  $t_R$ (major) = 5.6 min,  $t_R$ (minor) = 7.7 min

Operator:mdsadmin Timebase:ultimate\_3000 Sequence:13.77C RAC + ASYM 30% IA

Page 1-1  
11/6/2012 2:33 PM

| 2 rac            |                 |                   |          |
|------------------|-----------------|-------------------|----------|
| Sample Name:     | rac             | Injection Volume: | 10.0     |
| Vial Number:     | RD4             | Channel:          | UV_VIS_2 |
| Sample Type:     | unknown         | Wavelength:       | 245.0    |
| Control Program: | program_new     | Bandwidth:        | 1        |
| Quantif. Method: | Method          | Dilution Factor:  | 1.0000   |
| Recording Time:  | 30/1/2012 19:21 | Sample Weight:    | 1.0000   |
| Run Time (min):  | 30.00           | Sample Amount:    | 1.0000   |

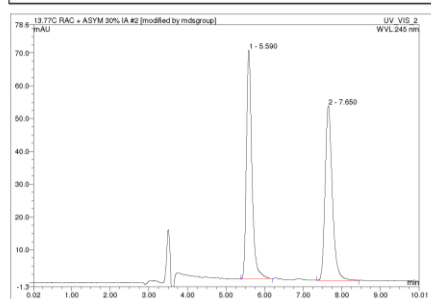

| No.    | Ret.Time<br>min | Peak Name | Height<br>mAU | Area<br>mAU*min | Rel.Area<br>% | Amount | Type |
|--------|-----------------|-----------|---------------|-----------------|---------------|--------|------|
| 1      | 5.59            | n.a.      | 69.748        | 11.520          | 50.17         | n.a.   | BMB  |
| 2      | 7.65            | n.a.      | 53.159        | 11.443          | 49.83         | n.a.   | BMB  |
| Total: |                 |           | 122.907       | 22.962          | 100.00        | 0.000  |      |

Operator:mdsadmin Timebase:ultimate\_3000 Sequence:13.77C ASYM REPEAT 30% IA

Page 1-1  
11/6/2012 2:34 PM

| 1 pck RD3        |                |                   |          |
|------------------|----------------|-------------------|----------|
| Sample Name:     | pck RD3        | Injection Volume: | 50.0     |
| Vial Number:     | RD3            | Channel:          | UV_VIS_2 |
| Sample Type:     | unknown        | Wavelength:       | 245.0    |
| Control Program: | program_new    | Bandwidth:        | 1        |
| Quantif. Method: | Method         | Dilution Factor:  | 1.0000   |
| Recording Time:  | 31/1/2012 8:36 | Sample Weight:    | 1.0000   |
| Run Time (min):  | 10.00          | Sample Amount:    | 1.0000   |

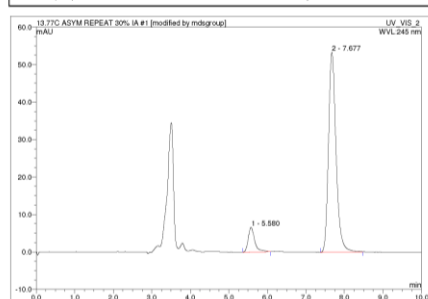

| No.    | Ret.Time<br>min | Peak Name | Height<br>mAU | Area<br>mAU*min | Rel.Area<br>% | Amount | Type |
|--------|-----------------|-----------|---------------|-----------------|---------------|--------|------|
| 1      | 5.58            | n.a.      | 6.576         | 1.275           | 9.58          | n.a.   | BMB  |
| 2      | 7.68            | n.a.      | 53.306        | 12.034          | 90.42         | n.a.   | BMB  |
| Total: |                 |           | 59.881        | 13.309          | 100.00        | 0.000  |      |





## 6. REFERENCES

- (1) Pangborn, A. B.; Giardello, M. A.; Grubbs, R. H.; Rosen, R. K.; Timmers, F. J. *Organometallics* **1996**, *15*, 1518–1520.
- (2) Armarego, W. L. F.; Perrin, D. D. *Purification of Laboratory Chemicals*; 4th ed.; Butterworth-Heinemann: Oxford, UK, 1996.
- (3) Corkey, B. K.; Toste, F. D. *J. Am. Chem. Soc.* **2007**, *129*, 2764–2765.
- (4) Kehler, J.; Ritzen, A.; Langgard, M.; Nielsen, J.; Farah, M.; Leth-Peterson, S.; Kilburn, J.-P. Triazolo- and pyrazoloquinazoline derivatives as PDE10A enzyme inhibitor. WO 2012007006, 2012.
- (5) Sicker, D.; Wilde, H. *J. für Prakt. Chemie/Chemiker-Zeitung* **1992**, *334*, 76–80.
- (6) Alkhatlan, H. Z.; Al-Farhan, K. A. *Heterocycles* **1998**, *48*, 641–655.
- (7) Genin, M. J.; Biles, C.; Keiser, B. J.; Poppe, S. M.; Swaney, S. M.; Tarpley, W. G.; Yagi, Y.; Romero, D. L. *J. Med. Chem.* **2000**, *43*, 1034–1040.
- (8) Jonsson, C.; Lundgren, S.; Haswell, S.; Moberg, C. *Tetrahedron* **2004**, *60*, 10515–10520.
- (9) Nishiyama, H.; Kondo, M.; Nakamura, T.; Itoh, K. *Organometallics* **1991**, *10*, 500–508.
- (10) Wipf, P.; Jung, J. K. *J. Org. Chem.* **2000**, *65*, 6319–6337.
- (11) Klussmann, M.; Ratjen, L.; Hoffmann, S.; Wakchaure, V.; Goddard, R.; List, B. *Synlett* **2010**, 2189–2192.
- (12) Nakashima, D.; Yamamoto, H. *J. Am. Chem. Soc.* **2006**, *128*, 9626–9627.
- (13) Hamilton, G. L.; Kang, E. J.; Mba, M.; Toste, F. D. *Science* **2007**, *317*, 496–499.
- (14) Rauniyar, V.; Wang, Z. J.; Burks, H. E.; Toste, F. D. *J. Am. Chem. Soc.* **2011**, *133*, 8486–8489.
- (15) Evans, D. A.; Wu, J. *J. Am. Chem. Soc.* **2003**, *125*, 10162–10163.
- (16) Liang, G. X.; Trauner, D. *J. Am. Chem. Soc.* **2004**, *126*, 9544–9545.
- (17) Prakash, M.; Kesavan, V. *Org. Lett.* **2012**, *14*, 1896–1899.
- (18) Kobayashi, S.; Araki, M.; Hachiya, I. *J. Org. Chem.* **1994**, *59*, 3758–3759.
- (19) Arai, T.; Sasai, H.; Aoe, K.; Okamura, K.; Date, T.; Shibasaki, M. *Angew. Chem. Int. Ed.* **1996**, *35*, 104–106.
